# Supplementary material
Source: publisher figshare collection journal article supplement (https://gsajournals.figshare.com/ndownloader/files/17710727)
Supplement: Supplementary file 1 [file 17710727]

## Sheet: S4.1_Figure 1 - TW_SC
S4.1 Data source for Figure 1
ID	Strain	B.W.	T.W.	S.C.
21G-96704	DX1	25.9	194	76.825
21G-96705	DX1	25.01	192	54.425			LEGEND:
21G-96706	DX1	25.56	177	41.825			mouse_id - mouse identification number from PyRAT system
21G-96707	DX1	27.64	197	41.3			strain - name of the strain
21G-94782	DX1	25.47	175	45.375			B.W. - Body weight [g]
21G-94783	DX1	23.71	182	45.75			T.W. - weight of pair of the testes [mg]
21G-94784	DX1	25.23	172	54.375			S.C. - sperm count - number of sperms [x106]
21G-95224	DX1	21.35	188	35
21G-95225	DX1	22.89	210	58.8
21O-B1348	DX1s	29.92	186	39.4
21O-B1349	DX1s	28.02	182	51
21O-B1501	DX1s	25.1	170	52.7
21O-B1502	DX1s	25.34	159	46.4
21O-B1503	DX1s	27.03	177	57.2
21S-74408	DX1s	23.98	168	60.8
21S-74409	DX1s	26.16	161	67.6
21G-79647	DX1s	28.89	176	55.2
21S-79073	DX1s	25.3	180	68.6
21S-84616	DX1s	27.44	173	64.5
21S-84617	DX1s	28.21	171	49.65
21S-84618	DX1s	23.91	168	49.95
21S-84619	DX1s	27.34	157	33.5
21G-81644	DX1s	29.23	179	52.7
21G-96021	DX64-69	33.33	207	67.2
21G-96022	DX64-69	31.11	189	65.25
21G-96023	DX64-69	31.73	198	44.1
21G-96024	DX64-69	32.33	187	73.05
21S-99856	DX64-69	25.7	155	45.6
21S-99314	DX64-69	21.97	146	31
21S-99315	DX64-69	26.57	160	48.3
21S-99316	DX64-69	22.37	131	38.3
21S-99317	DX64-69	24.48	152	42
21G-E1725	DX66-69	22.59	149	45.1
21G-E4490	DX66-69	21.82	157	32.1
21G-E4491	DX66-69	23.15	154	28.35
21G-E4492	DX66-69	25.18	162	28.2
21G-94842	DX66-69	24.22	152	22.625
21G-81967	(B6 x PWD)F1	23.46	106	5.15
21G-81969	(B6 x PWD)F1	27.32	98	4.25
21G-81971	(B6 x PWD)F1	28.67	114	12.7
21G-82281	(B6 x PWD)F1	27.78	121	10.05
21G-82283	(B6 x PWD)F1	27.59	110	8.5
21G-82284	(B6 x PWD)F1	26.99	106	7.2
21G-83092	(B6 x PWD)F1	27.39	99	5.5
21G-83093	(B6 x PWD)F1	26.32	102	4.05
21G-83094	(B6 x PWD)F1	24.29	98	4.9
21G-83095	(B6 x PWD)F1	23.76	93	5.7
21G-82814	(B6 x PWD)F1	27.13	102	9
21G-82815	(B6 x PWD)F1	27.25	95	3.5
21G-82817	(B6 x PWD)F1	28.45	117	12.2
21G-85328	(B6 x PWD)F1	23.77	113	18.7
21G-85330	(B6 x PWD)F1	20.34	90	4.6
21G-85331	(B6 x PWD)F1	22.17	86	2.15
21G-85399	(B6 x PWD)F1	21.35	104	4.25
21G-85806	(B6 x PWD)F1	22.88	100	7.25
21G-85807	(B6 x PWD)F1	23.09	96	5.25
21G-86422	(B6 x PWD)F1	28.83	119	2.35
21G-86423	(B6 x PWD)F1	29.65	116	2.7
21G-86425	(B6 x PWD)F1	26.27	108	3.1
21G-86427	(B6 x PWD)F1	25.94	100	2.65
21G-84529	(B6 x PWD)F1	28.42	106	8.6
21G-84530	(B6 x PWD)F1	25.74	109	5.8
21G-84532	(B6 x PWD)F1	25.61	106	7.65
21G-84533	(B6 x PWD)F1	27.26	112	11.35
21G-84945	(B6 x PWD)F1	24.68	88	5.45
21G-97103	(B6 x PWD)F1	23.56	99	7.2
21G-97105	(B6 x PWD)F1	25.11	103	7.85
21G-97107	(B6 x PWD)F1	25.53	114	16.7
21G-97108	(B6 x PWD)F1	24.95	104	6.2
21G-97109	(B6 x PWD)F1	23.32	86	2.8
21G-97110	(B6 x PWD)F1	25.42	109	8.5
21G-97112	(B6 x PWD)F1	25.89	88	0.99
21G-97914	(B6 x PWD)F1	24.98	90	2.85
21G-97918	(B6 x PWD)F1	25.93	92	2.55
21G-98088	(B6 x PWD)F1	23.11	102	5.45
21G-98091	(B6 x PWD)F1	21.89	86	1.4
21G-98610	(B6 x PWD)F1	29.26	106	3.4
21G-99215	(B6 x PWD)F1	26.88	102	6.175
21G-99217	(B6 x PWD)F1	25.09	100	4.375
18S-48365	(DX1 x PWD)F1	26.22	114	12.61
18S-48366	(DX1 x PWD)F1	25.83	105	5.7
18S-48367	(DX1 x PWD)F1	25.9	99	3.89
21G-94950	(PWD x B6)F1	25.84	68	0.045
21G-94951	(PWD x B6)F1	26.71	65	0
21G-89986	(PWD x B6)F1	28.23	63	0
21G-89987	(PWD x B6)F1	27.46	66	0
21G-89988	(PWD x B6)F1	24.13	64	0
21G-84239	(DX1S x PWD)F1	24.38	62	0.07
21G-84240	(DX1S x PWD)F1	23.89	63	0
21G-84241	(DX1S x PWD)F1	27.12	66	0
21G-84294	(DX1S x PWD)F1	26.21	62	0.08
21G-84295	(DX1S x PWD)F1	22.47	58	0
21G-84296	(DX1S x PWD)F1	25.09	67	0
21G-84321	(DX1S x PWD)F1	21.42	66	0.005
21G-84329	(DX1S x PWD)F1	23.99	67	0
21G-84330	(DX1S x PWD)F1	23.79	63	0
21G-84331	(DX1S x PWD)F1	24.26	65	0
21G-84347	(DX1S x PWD)F1	21.81	62	0
21G-84348	(DX1S x PWD)F1	23.42	61	0
21G-84349	(DX1S x PWD)F1	23.23	59	0.005
21G-84350	(DX1S x PWD)F1	25.15	63	0
21G-84351	(DX1S x PWD)F1	20.26	61	0
21G-88964	(DX1S x PWD)F1	23.01	60	0
21G-88965	(DX1S x PWD)F1	23.07	61	0
21G-88966	(DX1S x PWD)F1	24.47	62	0
21G-84403	(DX1S x PWD)F1	25.83	69	0.015
21G-84404	(DX1S x PWD)F1	21.69	60	0
21G-81745	(DX64-69 x PWD)F1	22.11	57	0
21G-81746	(DX64-69 x PWD)F1	24.65	62	0
21G-81968	(DX64-69 x PWD)F1	25.63	58	0
21G-81970	(DX64-69 x PWD)F1	26.93	57	0
21G-81972	(DX64-69 x PWD)F1	24.78	52	0
21G-81973	(DX64-69 x PWD)F1	29.83	60	0
21G-82282	(DX64-69 x PWD)F1	24.8	53	0
21G-83085	(DX64-69 x PWD)F1	20.76	43	0
21G-83086	(DX64-69 x PWD)F1	20.08	39	0
21G-83087	(DX64-69 x PWD)F1	23.35	47	0
21G-83088	(DX64-69 x PWD)F1	24.12	48	0
21G-83090	(DX64-69 x PWD)F1	22.31	48	0
21G-83091	(DX64-69 x PWD)F1	24.38	63	0
21G-85329	(DX64-69 x PWD)F1	21.47	50	0.02
21G-85332	(DX64-69 x PWD)F1	24.02	55	0
21G-85400	(DX64-69 x PWD)F1	23.27	56	0
21G-85503	(DX64-69 x PWD)F1	20.91	49	0
21G-85504	(DX64-69 x PWD)F1	26.71	62	0.01
21G-85805	(DX64-69 x PWD)F1	23.46	52	0
21G-85808	(DX64-69 x PWD)F1	27.07	56	0
21G-84528	(DX64-69 x PWD)F1	26.58	63	0.05
21G-84531	(DX64-69 x PWD)F1	25.23	60	0
21G-84534	(DX64-69 x PWD)F1	28.26	59	0
21G-84535	(DX64-69 x PWD)F1	27.7	57	0.01
21G-84536	(DX64-69 x PWD)F1	25.92	61	0
21G-96193	(DX66-69 x PWD)F1	21.57	49	0
21G-96196	(DX66-69 x PWD)F1	22.64	52	0
21G-97104	(DX66-69 x PWD)F1	22.89	50	0.18
21G-97106	(DX66-69 x PWD)F1	21.85	59	0.005
21G-97111	(DX66-69 x PWD)F1	23.88	55	0
21G-97113	(DX66-69 x PWD)F1	21.69	50	0.005
21G-97114	(DX66-69 x PWD)F1	26.54	58	0
21G-97915	(DX66-69 x PWD)F1	22.69	53	0.07
21G-97916	(DX66-69 x PWD)F1	23.3	58	0
21G-97917	(DX66-69 x PWD)F1	21.17	52	0
21G-97919	(DX66-69 x PWD)F1	23.97	67	0
21G-98084	(DX66-69 x PWD)F1	23.3	55	0
21G-98085	(DX66-69 x PWD)F1	23.14	63	0
21G-98086	(DX66-69 x PWD)F1	21.64	48	0
21G-98087	(DX66-69 x PWD)F1	21.05	60	0
21G-98089	(DX66-69 x PWD)F1	22.78	52	0
21G-98090	(DX66-69 x PWD)F1	23.68	53	0
21G-98608	(DX66-69 x PWD)F1	28.93	59	0.01
21G-98609	(DX66-69 x PWD)F1	26.25	61	0.005
21G-99216	(DX66-69 x PWD)F1	24.14	55	0

## Sheet: S4.2_Figure 1 - Sperm malforms
S4.2 Data source for Figure 1
nr	ID	Strain	normal	malformation of head shape	malformation of hook
1	21G-96704	DX1	1	0	0				LEGEND:
2	21G-96704	DX1	0	0	1				mouse_id - mouse identification number from PyRAT system
3	21G-96704	DX1	1	0	0				strain - name of the strain
4	21G-96704	DX1	1	0	0				normal - normal shape of sperm head
5	21G-96704	DX1	0	0	1
6	21G-96704	DX1	0	1	0
7	21G-96704	DX1	1	0	0
8	21G-96704	DX1	1	0	0
9	21G-96704	DX1	0	1	0
10	21G-96704	DX1	1	0	0
11	21G-96704	DX1	0	1	0
12	21G-96704	DX1	1	0	0
13	21G-96704	DX1	1	0	0
14	21G-96704	DX1	0	1	0
15	21G-96704	DX1	1	0	0
16	21G-96704	DX1	1	0	0
17	21G-96704	DX1	0	0	1
18	21G-96704	DX1	1	0	0
19	21G-96704	DX1	0	0	1
20	21G-96704	DX1	1	0	0
21	21G-96704	DX1	1	0	0
22	21G-96704	DX1	1	0	0
23	21G-96704	DX1	1	0	0
24	21G-96704	DX1	0	0	1
25	21G-96704	DX1	0	0	1
26	21G-96704	DX1	1	0	0
27	21G-96704	DX1	1	0	0
28	21G-96704	DX1	1	0	0
29	21G-96704	DX1	1	0	0
30	21G-96704	DX1	1	0	0
31	21G-96704	DX1	1	0	0
32	21G-96704	DX1	1	0	0
33	21G-96704	DX1	1	0	0
34	21G-96704	DX1	1	0	0
35	21G-96704	DX1	1	0	0
36	21G-96704	DX1	1	0	0
37	21G-96704	DX1	1	0	0
38	21G-96704	DX1	0	0	1
39	21G-96704	DX1	1	0	0
40	21G-96704	DX1	1	0	0
41	21G-96704	DX1	1	0	0
42	21G-96704	DX1	1	0	0
43	21G-96704	DX1	1	0	0
44	21G-96704	DX1	1	0	0
45	21G-96704	DX1	1	0	0
46	21G-96704	DX1	0	0	1
47	21G-96704	DX1	0	0	1
48	21G-96704	DX1	1	0	0
49	21G-96704	DX1	1	0	0
50	21G-96704	DX1	1	0	0
51	21G-96704	DX1	1	0	0
52	21G-96704	DX1	0	1	0
53	21G-96704	DX1	0	1	0
54	21G-96704	DX1	1	0	0
55	21G-96704	DX1	1	0	0
56	21G-96704	DX1	1	0	0
57	21G-96704	DX1	0	0	1
58	21G-96704	DX1	1	0	0
59	21G-96704	DX1	1	0	0
60	21G-96704	DX1	0	1	0
61	21G-96704	DX1	1	0	0
62	21G-96704	DX1	1	0	0
63	21G-96704	DX1	1	0	0
64	21G-96704	DX1	1	0	0
65	21G-96704	DX1	1	0	0
66	21G-96704	DX1	1	0	0
67	21G-96704	DX1	1	0	0
68	21G-96704	DX1	1	0	0
69	21G-96704	DX1	1	0	0
70	21G-96704	DX1	1	0	0
71	21G-96704	DX1	1	0	0
72	21G-96704	DX1	1	0	0
73	21G-96704	DX1	0	0	1
74	21G-96704	DX1	1	0	0
75	21G-96704	DX1	1	0	0
76	21G-96704	DX1	1	0	0
77	21G-96704	DX1	1	0	0
78	21G-96704	DX1	1	0	0
79	21G-96704	DX1	1	0	0
80	21G-96704	DX1	1	0	0
81	21G-96704	DX1	0	1	0
82	21G-96704	DX1	1	0	0
83	21G-96704	DX1	1	0	0
84	21G-96704	DX1	1	0	0
85	21G-96704	DX1	0	0	1
86	21G-96704	DX1	1	0	0
87	21G-96704	DX1	1	0	0
88	21G-96704	DX1	1	0	0
89	21G-96704	DX1	0	0	1
90	21G-96704	DX1	1	0	0
91	21G-96704	DX1	1	0	0
92	21G-96704	DX1	1	0	0
93	21G-96704	DX1	1	0	0
94	21G-96704	DX1	1	0	0
95	21G-96704	DX1	0	0	1
96	21G-96704	DX1	0	0	1
97	21G-96704	DX1	1	0	0
98	21G-96704	DX1	0	0	1
99	21G-96704	DX1	1	0	0
100	21G-96704	DX1	1	0	0
1	21G-96705	DX1	1	0	0
2	21G-96705	DX1	1	0	0
3	21G-96705	DX1	0	1	0
4	21G-96705	DX1	1	0	0
5	21G-96705	DX1	1	0	0
6	21G-96705	DX1	0	1	0
7	21G-96705	DX1	1	0	0
8	21G-96705	DX1	1	0	0
9	21G-96705	DX1	1	0	0
10	21G-96705	DX1	1	0	0
11	21G-96705	DX1	1	0	0
12	21G-96705	DX1	1	0	0
13	21G-96705	DX1	1	0	0
14	21G-96705	DX1	0	0	1
15	21G-96705	DX1	0	0	1
16	21G-96705	DX1	1	0	0
17	21G-96705	DX1	1	0	0
18	21G-96705	DX1	1	0	0
19	21G-96705	DX1	1	0	0
20	21G-96705	DX1	1	0	0
21	21G-96705	DX1	1	0	0
22	21G-96705	DX1	1	0	0
23	21G-96705	DX1	1	0	0
24	21G-96705	DX1	1	0	0
25	21G-96705	DX1	0	1	0
26	21G-96705	DX1	0	0	1
27	21G-96705	DX1	0	0	1
28	21G-96705	DX1	1	0	0
29	21G-96705	DX1	0	0	1
30	21G-96705	DX1	1	0	0
31	21G-96705	DX1	1	0	0
32	21G-96705	DX1	1	0	0
33	21G-96705	DX1	1	0	0
34	21G-96705	DX1	1	0	0
35	21G-96705	DX1	0	0	1
36	21G-96705	DX1	1	0	0
37	21G-96705	DX1	1	0	0
38	21G-96705	DX1	1	0	0
39	21G-96705	DX1	1	0	0
40	21G-96705	DX1	0	0	1
41	21G-96705	DX1	1	0	0
42	21G-96705	DX1	1	0	0
43	21G-96705	DX1	0	1	0
44	21G-96705	DX1	0	0	1
45	21G-96705	DX1	1	0	0
46	21G-96705	DX1	1	0	0
47	21G-96705	DX1	1	0	0
48	21G-96705	DX1	1	0	0
49	21G-96705	DX1	1	0	0
50	21G-96705	DX1	1	0	0
51	21G-96705	DX1	1	0	0
52	21G-96705	DX1	1	0	0
53	21G-96705	DX1	0	0	1
54	21G-96705	DX1	1	0	0
55	21G-96705	DX1	1	0	0
56	21G-96705	DX1	0	1	0
57	21G-96705	DX1	1	0	0
58	21G-96705	DX1	1	0	0
59	21G-96705	DX1	0	0	1
60	21G-96705	DX1	1	0	0
61	21G-96705	DX1	1	0	0
62	21G-96705	DX1	1	0	0
63	21G-96705	DX1	1	0	0
64	21G-96705	DX1	1	0	0
65	21G-96705	DX1	0	0	1
66	21G-96705	DX1	1	0	0
67	21G-96705	DX1	1	0	0
68	21G-96705	DX1	1	0	0
69	21G-96705	DX1	0	0	1
70	21G-96705	DX1	1	0	0
71	21G-96705	DX1	1	0	0
72	21G-96705	DX1	0	0	1
73	21G-96705	DX1	0	0	1
74	21G-96705	DX1	0	0	1
75	21G-96705	DX1	1	0	0
76	21G-96705	DX1	1	0	0
77	21G-96705	DX1	1	0	0
78	21G-96705	DX1	1	0	0
79	21G-96705	DX1	1	0	0
80	21G-96705	DX1	1	0	0
81	21G-96705	DX1	1	0	0
82	21G-96705	DX1	0	0	1
83	21G-96705	DX1	1	0	0
84	21G-96705	DX1	0	0	1
85	21G-96705	DX1	1	0	0
86	21G-96705	DX1	0	1	0
87	21G-96705	DX1	1	0	0
88	21G-96705	DX1	1	0	0
89	21G-96705	DX1	1	0	0
90	21G-96705	DX1	1	0	0
91	21G-96705	DX1	1	0	0
92	21G-96705	DX1	0	1	0
93	21G-96705	DX1	1	0	0
94	21G-96705	DX1	1	0	0
95	21G-96705	DX1	1	0	0
96	21G-96705	DX1	1	0	0
97	21G-96705	DX1	1	0	0
98	21G-96705	DX1	0	0	1
99	21G-96705	DX1	1	0	0
100	21G-96705	DX1	0	0	1
1	21G-96706	DX1	1	0	0
2	21G-96706	DX1	1	0	0
3	21G-96706	DX1	1	0	0
4	21G-96706	DX1	1	0	0
5	21G-96706	DX1	1	0	0
6	21G-96706	DX1	1	0	0
7	21G-96706	DX1	1	0	0
8	21G-96706	DX1	1	0	0
9	21G-96706	DX1	1	0	0
10	21G-96706	DX1	0	1	0
11	21G-96706	DX1	0	1	0
12	21G-96706	DX1	1	0	0
13	21G-96706	DX1	1	0	0
14	21G-96706	DX1	0	0	1
15	21G-96706	DX1	1	0	0
16	21G-96706	DX1	1	0	0
17	21G-96706	DX1	1	0	0
18	21G-96706	DX1	1	0	0
19	21G-96706	DX1	0	1	0
20	21G-96706	DX1	1	0	0
21	21G-96706	DX1	1	0	0
22	21G-96706	DX1	0	0	1
23	21G-96706	DX1	1	0	0
24	21G-96706	DX1	0	0	1
25	21G-96706	DX1	1	0	0
26	21G-96706	DX1	1	0	0
27	21G-96706	DX1	0	0	1
28	21G-96706	DX1	1	0	0
29	21G-96706	DX1	1	0	0
30	21G-96706	DX1	1	0	0
31	21G-96706	DX1	1	0	0
32	21G-96706	DX1	1	0	0
33	21G-96706	DX1	1	0	0
34	21G-96706	DX1	0	1	0
35	21G-96706	DX1	0	0	1
36	21G-96706	DX1	1	0	0
37	21G-96706	DX1	1	0	0
38	21G-96706	DX1	1	0	0
39	21G-96706	DX1	0	0	1
40	21G-96706	DX1	1	0	0
41	21G-96706	DX1	0	0	1
42	21G-96706	DX1	1	0	0
43	21G-96706	DX1	1	0	0
44	21G-96706	DX1	1	0	0
45	21G-96706	DX1	0	1	0
46	21G-96706	DX1	0	1	0
47	21G-96706	DX1	1	0	0
48	21G-96706	DX1	1	0	0
49	21G-96706	DX1	1	0	0
50	21G-96706	DX1	0	0	1
51	21G-96706	DX1	0	1	0
52	21G-96706	DX1	1	0	0
53	21G-96706	DX1	1	0	0
54	21G-96706	DX1	1	0	0
55	21G-96706	DX1	1	0	0
56	21G-96706	DX1	1	0	0
57	21G-96706	DX1	1	0	0
58	21G-96706	DX1	1	0	0
59	21G-96706	DX1	1	0	0
60	21G-96706	DX1	0	0	1
61	21G-96706	DX1	1	0	0
62	21G-96706	DX1	0	1	0
63	21G-96706	DX1	1	0	0
64	21G-96706	DX1	1	0	0
65	21G-96706	DX1	1	0	0
66	21G-96706	DX1	1	0	0
67	21G-96706	DX1	1	0	0
68	21G-96706	DX1	1	0	0
69	21G-96706	DX1	1	0	0
70	21G-96706	DX1	0	0	1
71	21G-96706	DX1	1	0	0
72	21G-96706	DX1	1	0	0
73	21G-96706	DX1	0	1	0
74	21G-96706	DX1	1	0	0
75	21G-96706	DX1	0	1	0
76	21G-96706	DX1	0	0	1
77	21G-96706	DX1	1	0	0
78	21G-96706	DX1	1	0	0
79	21G-96706	DX1	1	0	0
80	21G-96706	DX1	0	0	1
81	21G-96706	DX1	1	0	0
82	21G-96706	DX1	1	0	0
83	21G-96706	DX1	1	0	0
84	21G-96706	DX1	1	0	0
85	21G-96706	DX1	1	0	0
86	21G-96706	DX1	1	0	0
87	21G-96706	DX1	0	0	1
88	21G-96706	DX1	0	0	1
89	21G-96706	DX1	1	0	0
90	21G-96706	DX1	0	0	1
91	21G-96706	DX1	0	1	0
92	21G-96706	DX1	0	1	0
93	21G-96706	DX1	1	0	0
94	21G-96706	DX1	1	0	0
95	21G-96706	DX1	1	0	0
96	21G-96706	DX1	1	0	0
97	21G-96706	DX1	1	0	0
98	21G-96706	DX1	1	0	0
99	21G-96706	DX1	1	0	0
100	21G-96706	DX1	1	0	0
1	21G-96707	DX1	0	0	1
2	21G-96707	DX1	0	1	0
3	21G-96707	DX1	1	0	0
4	21G-96707	DX1	1	0	0
5	21G-96707	DX1	1	0	0
6	21G-96707	DX1	1	0	0
7	21G-96707	DX1	0	0	1
8	21G-96707	DX1	1	0	0
9	21G-96707	DX1	1	0	0
10	21G-96707	DX1	1	0	0
11	21G-96707	DX1	1	0	0
12	21G-96707	DX1	1	0	0
13	21G-96707	DX1	1	0	0
14	21G-96707	DX1	0	1	0
15	21G-96707	DX1	1	0	0
16	21G-96707	DX1	1	0	0
17	21G-96707	DX1	1	0	0
18	21G-96707	DX1	1	0	0
19	21G-96707	DX1	0	0	1
20	21G-96707	DX1	0	0	1
21	21G-96707	DX1	1	0	0
22	21G-96707	DX1	1	0	0
23	21G-96707	DX1	1	0	0
24	21G-96707	DX1	1	0	0
25	21G-96707	DX1	1	0	0
26	21G-96707	DX1	1	0	0
27	21G-96707	DX1	0	0	1
28	21G-96707	DX1	0	0	1
29	21G-96707	DX1	1	0	0
30	21G-96707	DX1	1	0	0
31	21G-96707	DX1	1	0	0
32	21G-96707	DX1	1	0	0
33	21G-96707	DX1	1	0	0
34	21G-96707	DX1	1	0	0
35	21G-96707	DX1	1	0	0
36	21G-96707	DX1	0	0	1
37	21G-96707	DX1	1	0	0
38	21G-96707	DX1	1	0	0
39	21G-96707	DX1	0	1	0
40	21G-96707	DX1	1	0	0
41	21G-96707	DX1	1	0	0
42	21G-96707	DX1	1	0	0
43	21G-96707	DX1	0	1	0
44	21G-96707	DX1	1	0	0
45	21G-96707	DX1	0	0	1
46	21G-96707	DX1	1	0	0
47	21G-96707	DX1	1	0	0
48	21G-96707	DX1	0	1	0
49	21G-96707	DX1	1	0	0
50	21G-96707	DX1	0	1	0
51	21G-96707	DX1	1	0	0
52	21G-96707	DX1	1	0	0
53	21G-96707	DX1	1	0	0
54	21G-96707	DX1	1	0	0
55	21G-96707	DX1	1	0	0
56	21G-96707	DX1	0	1	0
57	21G-96707	DX1	1	0	0
58	21G-96707	DX1	1	0	0
59	21G-96707	DX1	1	0	0
60	21G-96707	DX1	1	0	0
61	21G-96707	DX1	1	0	0
62	21G-96707	DX1	0	1	0
63	21G-96707	DX1	1	0	0
64	21G-96707	DX1	1	0	0
65	21G-96707	DX1	0	1	0
66	21G-96707	DX1	1	0	0
67	21G-96707	DX1	1	0	0
68	21G-96707	DX1	1	0	0
69	21G-96707	DX1	1	0	0
70	21G-96707	DX1	1	0	0
71	21G-96707	DX1	1	0	0
72	21G-96707	DX1	0	1	0
73	21G-96707	DX1	0	0	1
74	21G-96707	DX1	1	0	0
75	21G-96707	DX1	1	0	0
76	21G-96707	DX1	0	1	0
77	21G-96707	DX1	1	0	0
78	21G-96707	DX1	0	1	0
79	21G-96707	DX1	0	1	0
80	21G-96707	DX1	1	0	0
81	21G-96707	DX1	1	0	0
82	21G-96707	DX1	1	0	0
83	21G-96707	DX1	1	0	0
84	21G-96707	DX1	1	0	0
85	21G-96707	DX1	1	0	0
86	21G-96707	DX1	1	0	0
87	21G-96707	DX1	1	0	0
88	21G-96707	DX1	1	0	0
89	21G-96707	DX1	1	0	0
90	21G-96707	DX1	1	0	0
91	21G-96707	DX1	1	0	0
92	21G-96707	DX1	1	0	0
93	21G-96707	DX1	1	0	0
94	21G-96707	DX1	1	0	0
95	21G-96707	DX1	1	0	0
96	21G-96707	DX1	1	0	0
97	21G-96707	DX1	1	0	0
98	21G-96707	DX1	1	0	0
99	21G-96707	DX1	1	0	0
100	21G-96707	DX1	1	0	0
1	21S-74408	DX1s	1	0	0
2	21S-74408	DX1s	1	0	0
3	21S-74408	DX1s	0	1	0
4	21S-74408	DX1s	0	1	0
5	21S-74408	DX1s	1	0	0
6	21S-74408	DX1s	1	0	0
7	21S-74408	DX1s	0	1	0
8	21S-74408	DX1s	1	0	0
9	21S-74408	DX1s	1	0	0
10	21S-74408	DX1s	0	1	0
11	21S-74408	DX1s	0	1	0
12	21S-74408	DX1s	1	0	0
13	21S-74408	DX1s	0	1	0
14	21S-74408	DX1s	0	1	0
15	21S-74408	DX1s	1	0	0
16	21S-74408	DX1s	0	0	1
17	21S-74408	DX1s	0	1	0
18	21S-74408	DX1s	0	1	0
19	21S-74408	DX1s	1	0	0
20	21S-74408	DX1s	1	0	0
21	21S-74408	DX1s	1	0	0
22	21S-74408	DX1s	1	0	0
23	21S-74408	DX1s	0	1	0
24	21S-74408	DX1s	0	1	0
25	21S-74408	DX1s	0	1	0
26	21S-74408	DX1s	1	0	0
27	21S-74408	DX1s	0	1	0
28	21S-74408	DX1s	1	0	0
29	21S-74408	DX1s	0	1	0
30	21S-74408	DX1s	0	0	1
31	21S-74408	DX1s	1	0	0
32	21S-74408	DX1s	0	0	1
33	21S-74408	DX1s	0	0	1
34	21S-74408	DX1s	1	0	0
35	21S-74408	DX1s	1	0	0
36	21S-74408	DX1s	1	0	0
37	21S-74408	DX1s	1	0	0
38	21S-74408	DX1s	0	1	0
39	21S-74408	DX1s	1	0	0
40	21S-74408	DX1s	0	1	0
41	21S-74408	DX1s	1	0	0
42	21S-74408	DX1s	0	1	0
43	21S-74408	DX1s	0	1	0
44	21S-74408	DX1s	1	0	0
45	21S-74408	DX1s	1	0	0
46	21S-74408	DX1s	0	1	0
47	21S-74408	DX1s	1	0	0
48	21S-74408	DX1s	0	0	1
49	21S-74408	DX1s	1	0	0
50	21S-74408	DX1s	0	1	0
51	21S-74408	DX1s	0	1	0
52	21S-74408	DX1s	0	1	0
53	21S-74408	DX1s	1	0	0
54	21S-74408	DX1s	0	1	0
55	21S-74408	DX1s	1	0	0
56	21S-74408	DX1s	1	0	0
57	21S-74408	DX1s	0	0	1
58	21S-74408	DX1s	0	1	0
59	21S-74408	DX1s	1	0	0
60	21S-74408	DX1s	1	0	0
61	21S-74408	DX1s	0	1	0
62	21S-74408	DX1s	0	1	0
63	21S-74408	DX1s	0	1	0
64	21S-74408	DX1s	1	0	0
65	21S-74408	DX1s	1	0	0
66	21S-74408	DX1s	0	1	0
67	21S-74408	DX1s	1	0	0
68	21S-74408	DX1s	1	0	0
69	21S-74408	DX1s	0	0	1
70	21S-74408	DX1s	0	0	1
71	21S-74408	DX1s	1	0	0
72	21S-74408	DX1s	0	1	0
73	21S-74408	DX1s	0	0	1
74	21S-74408	DX1s	1	0	0
75	21S-74408	DX1s	0	0	1
76	21S-74408	DX1s	0	1	0
77	21S-74408	DX1s	1	0	0
78	21S-74408	DX1s	1	0	0
79	21S-74408	DX1s	0	1	0
80	21S-74408	DX1s	1	0	0
81	21S-74408	DX1s	0	1	0
82	21S-74408	DX1s	0	0	1
83	21S-74408	DX1s	0	1	0
84	21S-74408	DX1s	0	0	1
85	21S-74408	DX1s	1	0	0
86	21S-74408	DX1s	0	1	0
87	21S-74408	DX1s	1	0	0
88	21S-74408	DX1s	0	1	0
89	21S-74408	DX1s	0	1	0
90	21S-74408	DX1s	0	1	0
91	21S-74408	DX1s	0	1	0
92	21S-74408	DX1s	0	1	0
93	21S-74408	DX1s	0	0	1
94	21S-74408	DX1s	0	1	0
95	21S-74408	DX1s	1	0	0
96	21S-74408	DX1s	0	1	0
97	21S-74408	DX1s	1	0	0
98	21S-74408	DX1s	0	0	1
99	21S-74408	DX1s	1	0	0
100	21S-74408	DX1s	0	0	1
1	21S-74409	DX1s	1	0	0
2	21S-74409	DX1s	0	1	0
3	21S-74409	DX1s	1	0	0
4	21S-74409	DX1s	0	1	0
5	21S-74409	DX1s	0	0	1
6	21S-74409	DX1s	1	0	0
7	21S-74409	DX1s	0	1	0
8	21S-74409	DX1s	1	0	0
9	21S-74409	DX1s	0	0	1
10	21S-74409	DX1s	0	0	1
11	21S-74409	DX1s	0	1	0
12	21S-74409	DX1s	1	0	0
13	21S-74409	DX1s	1	0	0
14	21S-74409	DX1s	0	0	1
15	21S-74409	DX1s	0	1	0
16	21S-74409	DX1s	0	1	0
17	21S-74409	DX1s	0	1	0
18	21S-74409	DX1s	0	0	1
19	21S-74409	DX1s	0	1	0
20	21S-74409	DX1s	0	1	0
21	21S-74409	DX1s	1	0	0
22	21S-74409	DX1s	1	0	0
23	21S-74409	DX1s	1	0	0
24	21S-74409	DX1s	0	0	1
25	21S-74409	DX1s	1	0	0
26	21S-74409	DX1s	1	0	0
27	21S-74409	DX1s	0	0	1
28	21S-74409	DX1s	0	0	1
29	21S-74409	DX1s	0	1	0
30	21S-74409	DX1s	0	1	0
31	21S-74409	DX1s	1	0	0
32	21S-74409	DX1s	1	0	0
33	21S-74409	DX1s	0	0	1
34	21S-74409	DX1s	1	0	0
35	21S-74409	DX1s	1	0	0
36	21S-74409	DX1s	0	1	0
37	21S-74409	DX1s	0	1	0
38	21S-74409	DX1s	0	1	0
39	21S-74409	DX1s	0	0	1
40	21S-74409	DX1s	0	1	0
41	21S-74409	DX1s	1	0	0
42	21S-74409	DX1s	0	1	0
43	21S-74409	DX1s	0	0	1
44	21S-74409	DX1s	0	0	1
45	21S-74409	DX1s	1	0	0
46	21S-74409	DX1s	0	1	0
47	21S-74409	DX1s	0	1	0
48	21S-74409	DX1s	0	0	1
49	21S-74409	DX1s	0	0	1
50	21S-74409	DX1s	0	1	0
51	21S-74409	DX1s	1	0	0
52	21S-74409	DX1s	0	1	0
53	21S-74409	DX1s	0	1	0
54	21S-74409	DX1s	0	1	0
55	21S-74409	DX1s	0	1	0
56	21S-74409	DX1s	0	1	0
57	21S-74409	DX1s	0	1	0
58	21S-74409	DX1s	0	1	0
59	21S-74409	DX1s	0	1	0
60	21S-74409	DX1s	1	0	0
61	21S-74409	DX1s	0	1	0
62	21S-74409	DX1s	0	0	1
63	21S-74409	DX1s	1	0	0
64	21S-74409	DX1s	0	1	0
65	21S-74409	DX1s	0	1	0
66	21S-74409	DX1s	1	0	0
67	21S-74409	DX1s	0	0	1
68	21S-74409	DX1s	0	1	0
69	21S-74409	DX1s	0	0	1
70	21S-74409	DX1s	0	1	0
71	21S-74409	DX1s	0	1	0
72	21S-74409	DX1s	0	1	0
73	21S-74409	DX1s	0	1	0
74	21S-74409	DX1s	0	1	0
75	21S-74409	DX1s	1	0	0
76	21S-74409	DX1s	1	0	0
77	21S-74409	DX1s	0	1	0
78	21S-74409	DX1s	0	1	0
79	21S-74409	DX1s	1	0	0
80	21S-74409	DX1s	0	0	1
81	21S-74409	DX1s	1	0	0
82	21S-74409	DX1s	0	1	0
83	21S-74409	DX1s	0	1	0
84	21S-74409	DX1s	0	1	0
85	21S-74409	DX1s	0	0	1
86	21S-74409	DX1s	0	1	0
87	21S-74409	DX1s	0	1	0
88	21S-74409	DX1s	0	0	1
89	21S-74409	DX1s	0	0	1
90	21S-74409	DX1s	1	0	0
91	21S-74409	DX1s	0	0	1
92	21S-74409	DX1s	0	0	1
93	21S-74409	DX1s	1	0	0
94	21S-74409	DX1s	0	1	0
95	21S-74409	DX1s	1	0	0
96	21S-74409	DX1s	0	1	0
97	21S-74409	DX1s	0	0	1
98	21S-74409	DX1s	1	0	0
99	21S-74409	DX1s	1	0	0
100	21S-74409	DX1s	0	1	0
1	21G-78291	DX1s	1	0	0
2	21G-78291	DX1s	1	0	0
3	21G-78291	DX1s	0	1	0
4	21G-78291	DX1s	1	0	0
5	21G-78291	DX1s	0	1	0
6	21G-78291	DX1s	1	0	0
7	21G-78291	DX1s	1	0	0
8	21G-78291	DX1s	1	0	0
9	21G-78291	DX1s	1	0	0
10	21G-78291	DX1s	1	0	0
11	21G-78291	DX1s	1	0	0
12	21G-78291	DX1s	0	1	0
13	21G-78291	DX1s	0	1	0
14	21G-78291	DX1s	1	0	0
15	21G-78291	DX1s	0	1	0
16	21G-78291	DX1s	0	0	1
17	21G-78291	DX1s	0	1	0
18	21G-78291	DX1s	1	0	0
19	21G-78291	DX1s	0	0	1
20	21G-78291	DX1s	0	1	0
21	21G-78291	DX1s	0	1	0
22	21G-78291	DX1s	0	0	1
23	21G-78291	DX1s	1	0	0
24	21G-78291	DX1s	1	0	0
25	21G-78291	DX1s	1	0	0
26	21G-78291	DX1s	0	1	0
27	21G-78291	DX1s	0	1	0
28	21G-78291	DX1s	0	1	0
29	21G-78291	DX1s	0	0	1
30	21G-78291	DX1s	0	0	1
31	21G-78291	DX1s	0	0	1
32	21G-78291	DX1s	1	0	0
33	21G-78291	DX1s	0	1	0
34	21G-78291	DX1s	0	1	0
35	21G-78291	DX1s	0	1	0
36	21G-78291	DX1s	0	1	0
37	21G-78291	DX1s	0	1	0
38	21G-78291	DX1s	1	0	0
39	21G-78291	DX1s	0	1	0
40	21G-78291	DX1s	0	0	1
41	21G-78291	DX1s	0	0	1
42	21G-78291	DX1s	0	0	1
43	21G-78291	DX1s	1	0	0
44	21G-78291	DX1s	0	0	1
45	21G-78291	DX1s	0	1	0
46	21G-78291	DX1s	1	0	0
47	21G-78291	DX1s	1	0	0
48	21G-78291	DX1s	0	1	0
49	21G-78291	DX1s	0	0	1
50	21G-78291	DX1s	0	1	0
51	21G-78291	DX1s	1	0	0
52	21G-78291	DX1s	0	1	0
53	21G-78291	DX1s	1	0	0
54	21G-78291	DX1s	1	0	0
55	21G-78291	DX1s	0	0	1
56	21G-78291	DX1s	0	0	1
57	21G-78291	DX1s	0	0	1
58	21G-78291	DX1s	0	1	0
59	21G-78291	DX1s	0	1	0
60	21G-78291	DX1s	0	0	1
61	21G-78291	DX1s	0	0	1
62	21G-78291	DX1s	0	0	1
63	21G-78291	DX1s	1	0	0
64	21G-78291	DX1s	0	0	1
65	21G-78291	DX1s	0	0	1
66	21G-78291	DX1s	0	1	0
67	21G-78291	DX1s	1	0	0
68	21G-78291	DX1s	0	0	1
69	21G-78291	DX1s	0	0	1
70	21G-78291	DX1s	0	1	0
71	21G-78291	DX1s	0	1	0
72	21G-78291	DX1s	0	1	0
73	21G-78291	DX1s	1	0	0
74	21G-78291	DX1s	0	0	1
75	21G-78291	DX1s	1	0	0
76	21G-78291	DX1s	0	1	0
77	21G-78291	DX1s	1	0	0
78	21G-78291	DX1s	0	1	0
79	21G-78291	DX1s	0	0	1
80	21G-78291	DX1s	0	1	0
81	21G-78291	DX1s	0	0	1
82	21G-78291	DX1s	0	1	0
83	21G-78291	DX1s	1	0	0
84	21G-78291	DX1s	1	0	0
85	21G-78291	DX1s	1	0	0
86	21G-78291	DX1s	0	1	0
87	21G-78291	DX1s	0	1	0
88	21G-78291	DX1s	0	0	1
89	21G-78291	DX1s	0	1	0
90	21G-78291	DX1s	0	1	0
91	21G-78291	DX1s	0	0	1
92	21G-78291	DX1s	0	1	0
93	21G-78291	DX1s	1	0	0
94	21G-78291	DX1s	0	1	0
95	21G-78291	DX1s	0	1	0
96	21G-78291	DX1s	1	0	0
97	21G-78291	DX1s	0	0	1
98	21G-78291	DX1s	1	0	0
99	21G-78291	DX1s	0	0	1
100	21G-78291	DX1s	0	0	1
1	21G-78292	DX1s	0	1	0
2	21G-78292	DX1s	1	0	0
3	21G-78292	DX1s	0	0	1
4	21G-78292	DX1s	0	1	0
5	21G-78292	DX1s	1	0	0
6	21G-78292	DX1s	1	0	0
7	21G-78292	DX1s	0	0	1
8	21G-78292	DX1s	1	0	0
9	21G-78292	DX1s	1	0	0
10	21G-78292	DX1s	0	1	0
11	21G-78292	DX1s	0	0	1
12	21G-78292	DX1s	1	0	0
13	21G-78292	DX1s	0	1	0
14	21G-78292	DX1s	0	1	0
15	21G-78292	DX1s	0	1	0
16	21G-78292	DX1s	0	0	1
17	21G-78292	DX1s	1	0	0
18	21G-78292	DX1s	0	0	1
19	21G-78292	DX1s	0	1	0
20	21G-78292	DX1s	0	1	0
21	21G-78292	DX1s	1	0	0
22	21G-78292	DX1s	0	1	0
23	21G-78292	DX1s	1	0	0
24	21G-78292	DX1s	0	1	0
25	21G-78292	DX1s	1	0	0
26	21G-78292	DX1s	1	0	0
27	21G-78292	DX1s	1	0	0
28	21G-78292	DX1s	1	0	0
29	21G-78292	DX1s	0	1	0
30	21G-78292	DX1s	0	0	1
31	21G-78292	DX1s	0	0	1
32	21G-78292	DX1s	0	1	0
33	21G-78292	DX1s	1	0	0
34	21G-78292	DX1s	1	0	0
35	21G-78292	DX1s	0	1	0
36	21G-78292	DX1s	0	0	1
37	21G-78292	DX1s	0	1	0
38	21G-78292	DX1s	1	0	0
39	21G-78292	DX1s	0	1	0
40	21G-78292	DX1s	0	1	0
41	21G-78292	DX1s	1	0	0
42	21G-78292	DX1s	0	0	1
43	21G-78292	DX1s	0	0	1
44	21G-78292	DX1s	0	0	1
45	21G-78292	DX1s	0	0	1
46	21G-78292	DX1s	1	0	0
47	21G-78292	DX1s	0	1	0
48	21G-78292	DX1s	1	0	0
49	21G-78292	DX1s	1	0	0
50	21G-78292	DX1s	1	0	0
51	21G-78292	DX1s	0	1	0
52	21G-78292	DX1s	0	1	0
53	21G-78292	DX1s	0	1	0
54	21G-78292	DX1s	0	0	1
55	21G-78292	DX1s	0	1	0
56	21G-78292	DX1s	1	0	0
57	21G-78292	DX1s	0	1	0
58	21G-78292	DX1s	0	0	1
59	21G-78292	DX1s	0	1	0
60	21G-78292	DX1s	0	1	0
61	21G-78292	DX1s	0	0	1
62	21G-78292	DX1s	0	1	0
63	21G-78292	DX1s	0	0	1
64	21G-78292	DX1s	0	1	0
65	21G-78292	DX1s	0	1	0
66	21G-78292	DX1s	0	1	0
67	21G-78292	DX1s	0	1	0
68	21G-78292	DX1s	1	0	0
69	21G-78292	DX1s	0	1	0
70	21G-78292	DX1s	1	0	0
71	21G-78292	DX1s	1	0	0
72	21G-78292	DX1s	1	0	0
73	21G-78292	DX1s	0	0	1
74	21G-78292	DX1s	0	1	0
75	21G-78292	DX1s	0	0	1
76	21G-78292	DX1s	0	1	0
77	21G-78292	DX1s	0	1	0
78	21G-78292	DX1s	0	1	0
79	21G-78292	DX1s	1	0	0
80	21G-78292	DX1s	1	0	0
81	21G-78292	DX1s	1	0	0
82	21G-78292	DX1s	0	1	0
83	21G-78292	DX1s	0	1	0
84	21G-78292	DX1s	0	1	0
85	21G-78292	DX1s	0	1	0
86	21G-78292	DX1s	0	1	0
87	21G-78292	DX1s	0	1	0
88	21G-78292	DX1s	1	0	0
89	21G-78292	DX1s	0	1	0
90	21G-78292	DX1s	0	1	0
91	21G-78292	DX1s	0	1	0
92	21G-78292	DX1s	0	0	1
93	21G-78292	DX1s	0	1	0
94	21G-78292	DX1s	1	0	0
95	21G-78292	DX1s	0	0	0
96	21G-78292	DX1s	0	1	0
97	21G-78292	DX1s	1	0	0
98	21G-78292	DX1s	0	0	1
99	21G-78292	DX1s	0	0	1
100	21G-78292	DX1s	1	0	0
1	21G-78293	DX1s	1	0	0
2	21G-78293	DX1s	0	0	1
3	21G-78293	DX1s	0	1	0
4	21G-78293	DX1s	0	1	0
5	21G-78293	DX1s	0	1	0
6	21G-78293	DX1s	0	1	0
7	21G-78293	DX1s	0	1	0
8	21G-78293	DX1s	1	0	0
9	21G-78293	DX1s	0	0	1
10	21G-78293	DX1s	0	0	1
11	21G-78293	DX1s	0	0	1
12	21G-78293	DX1s	0	1	0
13	21G-78293	DX1s	1	0	0
14	21G-78293	DX1s	0	0	1
15	21G-78293	DX1s	1	0	0
16	21G-78293	DX1s	0	0	1
17	21G-78293	DX1s	0	1	0
18	21G-78293	DX1s	0	1	0
19	21G-78293	DX1s	1	0	0
20	21G-78293	DX1s	1	0	0
21	21G-78293	DX1s	0	1	0
22	21G-78293	DX1s	0	1	0
23	21G-78293	DX1s	1	0	0
24	21G-78293	DX1s	1	0	0
25	21G-78293	DX1s	1	0	0
26	21G-78293	DX1s	0	1	0
27	21G-78293	DX1s	1	0	0
28	21G-78293	DX1s	0	1	0
29	21G-78293	DX1s	0	0	1
30	21G-78293	DX1s	0	1	0
31	21G-78293	DX1s	0	1	0
32	21G-78293	DX1s	0	1	0
33	21G-78293	DX1s	0	0	1
34	21G-78293	DX1s	0	0	1
35	21G-78293	DX1s	0	0	1
36	21G-78293	DX1s	1	0	0
37	21G-78293	DX1s	0	1	0
38	21G-78293	DX1s	0	0	1
39	21G-78293	DX1s	1	0	0
40	21G-78293	DX1s	0	1	0
41	21G-78293	DX1s	1	0	0
42	21G-78293	DX1s	0	1	0
43	21G-78293	DX1s	0	1	0
44	21G-78293	DX1s	0	0	1
45	21G-78293	DX1s	0	1	0
46	21G-78293	DX1s	0	1	0
47	21G-78293	DX1s	0	1	0
48	21G-78293	DX1s	0	0	1
49	21G-78293	DX1s	1	0	0
50	21G-78293	DX1s	0	0	1
51	21G-78293	DX1s	1	0	0
52	21G-78293	DX1s	1	0	0
53	21G-78293	DX1s	1	0	0
54	21G-78293	DX1s	0	0	1
55	21G-78293	DX1s	0	1	0
56	21G-78293	DX1s	0	1	0
57	21G-78293	DX1s	0	1	0
58	21G-78293	DX1s	0	1	0
59	21G-78293	DX1s	0	1	0
60	21G-78293	DX1s	0	1	0
61	21G-78293	DX1s	0	1	0
62	21G-78293	DX1s	1	0	0
63	21G-78293	DX1s	1	0	0
64	21G-78293	DX1s	1	0	0
65	21G-78293	DX1s	0	0	1
66	21G-78293	DX1s	0	1	0
67	21G-78293	DX1s	0	1	0
68	21G-78293	DX1s	0	1	0
69	21G-78293	DX1s	1	0	0
70	21G-78293	DX1s	0	1	0
71	21G-78293	DX1s	1	0	0
72	21G-78293	DX1s	0	1	0
73	21G-78293	DX1s	0	1	0
74	21G-78293	DX1s	0	1	0
75	21G-78293	DX1s	0	1	0
76	21G-78293	DX1s	1	0	0
77	21G-78293	DX1s	0	0	1
78	21G-78293	DX1s	1	0	0
79	21G-78293	DX1s	0	1	0
80	21G-78293	DX1s	1	0	0
81	21G-78293	DX1s	0	0	1
82	21G-78293	DX1s	0	1	0
83	21G-78293	DX1s	0	1	0
84	21G-78293	DX1s	0	1	0
85	21G-78293	DX1s	1	0	0
86	21G-78293	DX1s	1	0	0
87	21G-78293	DX1s	0	0	1
88	21G-78293	DX1s	1	0	0
89	21G-78293	DX1s	0	1	0
90	21G-78293	DX1s	0	0	1
91	21G-78293	DX1s	0	1	0
92	21G-78293	DX1s	0	1	0
93	21G-78293	DX1s	1	0	0
94	21G-78293	DX1s	0	1	0
95	21G-78293	DX1s	0	1	0
96	21G-78293	DX1s	0	0	1
97	21G-78293	DX1s	0	1	0
98	21G-78293	DX1s	1	0	0
99	21G-78293	DX1s	0	1	0
100	21G-78293	DX1s	1	0	0
1	21S-84616	DX1s	0	1	0
2	21S-84616	DX1s	0	0	1
3	21S-84616	DX1s	0	1	0
4	21S-84616	DX1s	0	0	1
5	21S-84616	DX1s	0	0	1
6	21S-84616	DX1s	0	0	1
7	21S-84616	DX1s	1	0	0
8	21S-84616	DX1s	0	0	1
9	21S-84616	DX1s	1	0	0
10	21S-84616	DX1s	1	0	0
11	21S-84616	DX1s	0	1	0
12	21S-84616	DX1s	0	1	0
13	21S-84616	DX1s	0	0	1
14	21S-84616	DX1s	1	0	0
15	21S-84616	DX1s	0	1	0
16	21S-84616	DX1s	1	0	0
17	21S-84616	DX1s	1	0	0
18	21S-84616	DX1s	0	1	0
19	21S-84616	DX1s	0	0	1
20	21S-84616	DX1s	0	0	1
21	21S-84616	DX1s	0	0	1
22	21S-84616	DX1s	0	0	1
23	21S-84616	DX1s	1	0	0
24	21S-84616	DX1s	1	0	0
25	21S-84616	DX1s	1	0	0
26	21S-84616	DX1s	0	1	0
27	21S-84616	DX1s	0	0	1
28	21S-84616	DX1s	0	1	0
29	21S-84616	DX1s	1	0	0
30	21S-84616	DX1s	1	0	0
31	21S-84616	DX1s	1	0	0
32	21S-84616	DX1s	1	0	0
33	21S-84616	DX1s	1	0	0
34	21S-84616	DX1s	0	1	0
35	21S-84616	DX1s	1	0	0
36	21S-84616	DX1s	1	0	0
37	21S-84616	DX1s	0	1	0
38	21S-84616	DX1s	0	1	0
39	21S-84616	DX1s	1	0	0
40	21S-84616	DX1s	0	0	1
41	21S-84616	DX1s	0	0	1
42	21S-84616	DX1s	1	0	0
43	21S-84616	DX1s	0	1	0
44	21S-84616	DX1s	0	1	0
45	21S-84616	DX1s	1	0	0
46	21S-84616	DX1s	1	0	0
47	21S-84616	DX1s	0	1	0
48	21S-84616	DX1s	0	0	1
49	21S-84616	DX1s	0	0	1
50	21S-84616	DX1s	0	1	0
51	21S-84616	DX1s	0	0	1
52	21S-84616	DX1s	1	0	0
53	21S-84616	DX1s	0	0	1
54	21S-84616	DX1s	0	1	0
55	21S-84616	DX1s	0	1	0
56	21S-84616	DX1s	1	0	0
57	21S-84616	DX1s	1	0	0
58	21S-84616	DX1s	0	1	0
59	21S-84616	DX1s	0	1	0
60	21S-84616	DX1s	0	0	1
61	21S-84616	DX1s	1	0	0
62	21S-84616	DX1s	0	0	1
63	21S-84616	DX1s	0	0	1
64	21S-84616	DX1s	0	0	1
65	21S-84616	DX1s	0	0	1
66	21S-84616	DX1s	0	0	1
67	21S-84616	DX1s	0	0	1
68	21S-84616	DX1s	0	1	0
69	21S-84616	DX1s	0	0	1
70	21S-84616	DX1s	0	0	1
71	21S-84616	DX1s	1	0	0
72	21S-84616	DX1s	0	1	0
73	21S-84616	DX1s	0	0	1
74	21S-84616	DX1s	0	1	0
75	21S-84616	DX1s	0	0	1
76	21S-84616	DX1s	0	0	1
77	21S-84616	DX1s	0	1	0
78	21S-84616	DX1s	0	1	0
79	21S-84616	DX1s	1	0	0
80	21S-84616	DX1s	0	0	1
81	21S-84616	DX1s	0	1	0
82	21S-84616	DX1s	0	0	1
83	21S-84616	DX1s	1	0	0
84	21S-84616	DX1s	0	0	1
85	21S-84616	DX1s	1	0	0
86	21S-84616	DX1s	1	0	0
87	21S-84616	DX1s	1	0	0
88	21S-84616	DX1s	0	0	1
89	21S-84616	DX1s	0	1	0
90	21S-84616	DX1s	1	0	0
91	21S-84616	DX1s	1	0	0
92	21S-84616	DX1s	1	0	0
93	21S-84616	DX1s	0	0	1
94	21S-84616	DX1s	1	0	0
95	21S-84616	DX1s	1	0	0
96	21S-84616	DX1s	1	0	0
97	21S-84616	DX1s	1	0	0
98	21S-84616	DX1s	0	1	0
99	21S-84616	DX1s	0	1	0
100	21S-84616	DX1s	0	0	1
1	21S-84617	DX1s	0	0	1
2	21S-84617	DX1s	1	0	0
3	21S-84617	DX1s	1	0	0
4	21S-84617	DX1s	0	0	1
5	21S-84617	DX1s	0	0	1
6	21S-84617	DX1s	1	0	0
7	21S-84617	DX1s	0	0	1
8	21S-84617	DX1s	0	1	0
9	21S-84617	DX1s	0	1	0
10	21S-84617	DX1s	0	1	0
11	21S-84617	DX1s	0	1	0
12	21S-84617	DX1s	0	1	0
13	21S-84617	DX1s	0	0	1
14	21S-84617	DX1s	1	0	0
15	21S-84617	DX1s	0	1	0
16	21S-84617	DX1s	1	0	0
17	21S-84617	DX1s	1	0	0
18	21S-84617	DX1s	0	1	0
19	21S-84617	DX1s	0	1	0
20	21S-84617	DX1s	0	0	1
21	21S-84617	DX1s	1	0	0
22	21S-84617	DX1s	0	0	1
23	21S-84617	DX1s	0	0	1
24	21S-84617	DX1s	0	0	1
25	21S-84617	DX1s	0	1	0
26	21S-84617	DX1s	0	0	1
27	21S-84617	DX1s	0	1	0
28	21S-84617	DX1s	0	0	1
29	21S-84617	DX1s	0	1	0
30	21S-84617	DX1s	0	1	0
31	21S-84617	DX1s	0	1	0
32	21S-84617	DX1s	0	0	1
33	21S-84617	DX1s	0	1	0
34	21S-84617	DX1s	0	1	0
35	21S-84617	DX1s	0	1	0
36	21S-84617	DX1s	0	1	0
37	21S-84617	DX1s	0	0	1
38	21S-84617	DX1s	0	1	0
39	21S-84617	DX1s	0	1	0
40	21S-84617	DX1s	0	0	1
41	21S-84617	DX1s	0	1	0
42	21S-84617	DX1s	0	1	0
43	21S-84617	DX1s	0	0	1
44	21S-84617	DX1s	0	0	1
45	21S-84617	DX1s	0	0	1
46	21S-84617	DX1s	1	0	0
47	21S-84617	DX1s	0	0	1
48	21S-84617	DX1s	0	0	1
49	21S-84617	DX1s	0	1	0
50	21S-84617	DX1s	0	0	1
51	21S-84617	DX1s	0	1	0
52	21S-84617	DX1s	0	1	0
53	21S-84617	DX1s	0	1	0
54	21S-84617	DX1s	1	0	0
55	21S-84617	DX1s	0	1	0
56	21S-84617	DX1s	0	0	1
57	21S-84617	DX1s	0	1	0
58	21S-84617	DX1s	0	0	1
59	21S-84617	DX1s	0	0	1
60	21S-84617	DX1s	1	0	0
61	21S-84617	DX1s	0	1	0
62	21S-84617	DX1s	1	0	0
63	21S-84617	DX1s	1	0	0
64	21S-84617	DX1s	1	0	0
65	21S-84617	DX1s	0	0	1
66	21S-84617	DX1s	0	0	1
67	21S-84617	DX1s	0	1	0
68	21S-84617	DX1s	0	0	1
69	21S-84617	DX1s	1	0	0
70	21S-84617	DX1s	0	0	1
71	21S-84617	DX1s	1	0	0
72	21S-84617	DX1s	0	0	1
73	21S-84617	DX1s	0	0	1
74	21S-84617	DX1s	1	0	0
75	21S-84617	DX1s	0	1	0
76	21S-84617	DX1s	0	1	0
77	21S-84617	DX1s	0	0	1
78	21S-84617	DX1s	0	1	0
79	21S-84617	DX1s	0	1	0
80	21S-84617	DX1s	0	0	1
81	21S-84617	DX1s	0	1	0
82	21S-84617	DX1s	1	0	0
83	21S-84617	DX1s	0	1	0
84	21S-84617	DX1s	0	1	0
85	21S-84617	DX1s	0	0	1
86	21S-84617	DX1s	0	1	0
87	21S-84617	DX1s	0	0	1
88	21S-84617	DX1s	1	0	0
89	21S-84617	DX1s	0	1	0
90	21S-84617	DX1s	0	1	0
91	21S-84617	DX1s	1	0	0
92	21S-84617	DX1s	0	0	1
93	21S-84617	DX1s	0	0	1
94	21S-84617	DX1s	0	0	1
95	21S-84617	DX1s	1	0	0
96	21S-84617	DX1s	1	0	0
97	21S-84617	DX1s	0	1	0
98	21S-84617	DX1s	0	1	0
99	21S-84617	DX1s	0	0	1
100	21S-84617	DX1s	1	0	0
1	21S-84618	DX1s	0	0	1
2	21S-84618	DX1s	1	0	0
3	21S-84618	DX1s	1	0	0
4	21S-84618	DX1s	0	1	0
5	21S-84618	DX1s	0	1	0
6	21S-84618	DX1s	0	1	0
7	21S-84618	DX1s	1	0	0
8	21S-84618	DX1s	0	0	1
9	21S-84618	DX1s	0	0	1
10	21S-84618	DX1s	0	0	1
11	21S-84618	DX1s	0	1	0
12	21S-84618	DX1s	0	1	0
13	21S-84618	DX1s	0	1	0
14	21S-84618	DX1s	0	1	0
15	21S-84618	DX1s	0	1	0
16	21S-84618	DX1s	0	0	1
17	21S-84618	DX1s	0	0	1
18	21S-84618	DX1s	0	1	0
19	21S-84618	DX1s	1	0	0
20	21S-84618	DX1s	0	0	1
21	21S-84618	DX1s	0	1	0
22	21S-84618	DX1s	0	1	0
23	21S-84618	DX1s	0	0	1
24	21S-84618	DX1s	0	0	1
25	21S-84618	DX1s	0	1	0
26	21S-84618	DX1s	0	1	0
27	21S-84618	DX1s	0	1	0
28	21S-84618	DX1s	0	1	0
29	21S-84618	DX1s	0	1	0
30	21S-84618	DX1s	0	1	0
31	21S-84618	DX1s	0	1	0
32	21S-84618	DX1s	1	0	0
33	21S-84618	DX1s	0	1	0
34	21S-84618	DX1s	1	0	0
35	21S-84618	DX1s	0	1	0
36	21S-84618	DX1s	0	1	0
37	21S-84618	DX1s	1	0	0
38	21S-84618	DX1s	0	1	0
39	21S-84618	DX1s	1	0	0
40	21S-84618	DX1s	0	1	0
41	21S-84618	DX1s	0	1	0
42	21S-84618	DX1s	0	0	1
43	21S-84618	DX1s	1	0	0
44	21S-84618	DX1s	0	1	0
45	21S-84618	DX1s	1	0	0
46	21S-84618	DX1s	0	1	0
47	21S-84618	DX1s	0	0	1
48	21S-84618	DX1s	1	0	0
49	21S-84618	DX1s	0	1	0
50	21S-84618	DX1s	1	0	0
51	21S-84618	DX1s	1	0	0
52	21S-84618	DX1s	0	1	0
53	21S-84618	DX1s	0	0	1
54	21S-84618	DX1s	0	0	1
55	21S-84618	DX1s	0	0	1
56	21S-84618	DX1s	0	0	1
57	21S-84618	DX1s	1	0	0
58	21S-84618	DX1s	0	1	0
59	21S-84618	DX1s	0	1	0
60	21S-84618	DX1s	0	1	0
61	21S-84618	DX1s	1	0	0
62	21S-84618	DX1s	0	0	1
63	21S-84618	DX1s	0	1	0
64	21S-84618	DX1s	0	1	0
65	21S-84618	DX1s	0	1	0
66	21S-84618	DX1s	0	1	0
67	21S-84618	DX1s	1	0	0
68	21S-84618	DX1s	1	0	0
69	21S-84618	DX1s	0	0	1
70	21S-84618	DX1s	0	1	0
71	21S-84618	DX1s	1	0	0
72	21S-84618	DX1s	1	0	0
73	21S-84618	DX1s	1	0	0
74	21S-84618	DX1s	1	0	0
75	21S-84618	DX1s	1	0	0
76	21S-84618	DX1s	0	0	1
77	21S-84618	DX1s	1	0	0
78	21S-84618	DX1s	1	0	0
79	21S-84618	DX1s	0	0	1
80	21S-84618	DX1s	1	0	0
81	21S-84618	DX1s	1	0	0
82	21S-84618	DX1s	0	1	0
83	21S-84618	DX1s	1	0	0
84	21S-84618	DX1s	1	0	0
85	21S-84618	DX1s	0	0	1
86	21S-84618	DX1s	0	0	1
87	21S-84618	DX1s	1	0	0
88	21S-84618	DX1s	0	1	0
89	21S-84618	DX1s	0	1	0
90	21S-84618	DX1s	0	1	0
91	21S-84618	DX1s	1	0	0
92	21S-84618	DX1s	1	0	0
93	21S-84618	DX1s	1	0	0
94	21S-84618	DX1s	0	1	0
95	21S-84618	DX1s	0	0	1
96	21S-84618	DX1s	1	0	0
97	21S-84618	DX1s	1	0	0
98	21S-84618	DX1s	0	1	0
99	21S-84618	DX1s	1	0	0
100	21S-84618	DX1s	1	0	0
1	21S-84619	DX1s	0	1	0
2	21S-84619	DX1s	1	0	0
3	21S-84619	DX1s	0	1	0
4	21S-84619	DX1s	0	0	1
5	21S-84619	DX1s	1	0	0
6	21S-84619	DX1s	0	1	0
7	21S-84619	DX1s	0	0	1
8	21S-84619	DX1s	0	0	1
9	21S-84619	DX1s	0	0	1
10	21S-84619	DX1s	1	0	0
11	21S-84619	DX1s	1	0	0
12	21S-84619	DX1s	0	1	0
13	21S-84619	DX1s	0	0	1
14	21S-84619	DX1s	1	0	0
15	21S-84619	DX1s	0	0	1
16	21S-84619	DX1s	1	0	0
17	21S-84619	DX1s	0	0	1
18	21S-84619	DX1s	0	0	1
19	21S-84619	DX1s	0	0	1
20	21S-84619	DX1s	1	0	0
21	21S-84619	DX1s	1	0	0
22	21S-84619	DX1s	0	1	0
23	21S-84619	DX1s	0	0	1
24	21S-84619	DX1s	0	1	0
25	21S-84619	DX1s	1	0	0
26	21S-84619	DX1s	0	0	1
27	21S-84619	DX1s	0	1	0
28	21S-84619	DX1s	0	0	1
29	21S-84619	DX1s	0	1	0
30	21S-84619	DX1s	1	0	0
31	21S-84619	DX1s	0	1	0
32	21S-84619	DX1s	0	1	0
33	21S-84619	DX1s	0	1	0
34	21S-84619	DX1s	1	0	0
35	21S-84619	DX1s	0	1	0
36	21S-84619	DX1s	0	1	0
37	21S-84619	DX1s	0	1	0
38	21S-84619	DX1s	1	0	0
39	21S-84619	DX1s	0	0	1
40	21S-84619	DX1s	1	0	0
41	21S-84619	DX1s	0	1	0
42	21S-84619	DX1s	1	0	0
43	21S-84619	DX1s	0	0	1
44	21S-84619	DX1s	1	0	0
45	21S-84619	DX1s	1	0	0
46	21S-84619	DX1s	0	0	1
47	21S-84619	DX1s	1	0	0
48	21S-84619	DX1s	0	1	0
49	21S-84619	DX1s	0	0	1
50	21S-84619	DX1s	1	0	0
51	21S-84619	DX1s	1	0	0
52	21S-84619	DX1s	1	0	0
53	21S-84619	DX1s	1	0	0
54	21S-84619	DX1s	1	0	0
55	21S-84619	DX1s	0	0	1
56	21S-84619	DX1s	0	1	0
57	21S-84619	DX1s	0	0	1
58	21S-84619	DX1s	0	1	0
59	21S-84619	DX1s	0	1	0
60	21S-84619	DX1s	0	1	0
61	21S-84619	DX1s	0	0	1
62	21S-84619	DX1s	0	1	0
63	21S-84619	DX1s	0	0	1
64	21S-84619	DX1s	0	1	0
65	21S-84619	DX1s	0	1	0
66	21S-84619	DX1s	1	0	0
67	21S-84619	DX1s	0	1	0
68	21S-84619	DX1s	0	1	0
69	21S-84619	DX1s	0	1	0
70	21S-84619	DX1s	0	0	1
71	21S-84619	DX1s	0	1	0
72	21S-84619	DX1s	0	1	0
73	21S-84619	DX1s	1	0	0
74	21S-84619	DX1s	1	0	0
75	21S-84619	DX1s	0	1	0
76	21S-84619	DX1s	0	1	0
77	21S-84619	DX1s	0	0	1
78	21S-84619	DX1s	0	1	0
79	21S-84619	DX1s	0	1	0
80	21S-84619	DX1s	0	0	1
81	21S-84619	DX1s	1	0	0
82	21S-84619	DX1s	0	1	0
83	21S-84619	DX1s	0	1	0
84	21S-84619	DX1s	1	0	0
85	21S-84619	DX1s	0	1	0
86	21S-84619	DX1s	0	1	0
87	21S-84619	DX1s	0	1	0
88	21S-84619	DX1s	0	0	1
89	21S-84619	DX1s	1	0	0
90	21S-84619	DX1s	0	0	1
91	21S-84619	DX1s	0	1	0
92	21S-84619	DX1s	1	0	0
93	21S-84619	DX1s	0	1	0
94	21S-84619	DX1s	0	0	1
95	21S-84619	DX1s	0	1	0
96	21S-84619	DX1s	0	0	1
97	21S-84619	DX1s	1	0	0
98	21S-84619	DX1s	0	1	0
99	21S-84619	DX1s	1	0	0
100	21S-84619	DX1s	0	1	0
1	21G-80504	DX1s	0	1	0
2	21G-80504	DX1s	0	0	1
3	21G-80504	DX1s	0	1	0
4	21G-80504	DX1s	0	1	0
5	21G-80504	DX1s	0	1	0
6	21G-80504	DX1s	0	0	1
7	21G-80504	DX1s	1	0	0
8	21G-80504	DX1s	0	1	0
9	21G-80504	DX1s	0	0	1
10	21G-80504	DX1s	0	0	1
11	21G-80504	DX1s	1	0	0
12	21G-80504	DX1s	0	1	0
13	21G-80504	DX1s	0	0	1
14	21G-80504	DX1s	0	1	0
15	21G-80504	DX1s	0	1	0
16	21G-80504	DX1s	1	0	0
17	21G-80504	DX1s	1	0	0
18	21G-80504	DX1s	1	0	0
19	21G-80504	DX1s	1	0	0
20	21G-80504	DX1s	1	0	0
21	21G-80504	DX1s	0	0	1
22	21G-80504	DX1s	0	1	0
23	21G-80504	DX1s	1	0	0
24	21G-80504	DX1s	0	1	0
25	21G-80504	DX1s	0	0	1
26	21G-80504	DX1s	0	0	1
27	21G-80504	DX1s	0	0	1
28	21G-80504	DX1s	0	1	0
29	21G-80504	DX1s	0	1	0
30	21G-80504	DX1s	0	0	1
31	21G-80504	DX1s	1	0	0
32	21G-80504	DX1s	0	0	1
33	21G-80504	DX1s	1	0	0
34	21G-80504	DX1s	0	1	0
35	21G-80504	DX1s	0	0	1
36	21G-80504	DX1s	1	0	0
37	21G-80504	DX1s	0	0	1
38	21G-80504	DX1s	0	1	0
39	21G-80504	DX1s	0	1	0
40	21G-80504	DX1s	0	0	1
41	21G-80504	DX1s	1	0	0
42	21G-80504	DX1s	0	1	0
43	21G-80504	DX1s	1	0	0
44	21G-80504	DX1s	1	0	0
45	21G-80504	DX1s	0	1	0
46	21G-80504	DX1s	0	1	0
47	21G-80504	DX1s	0	0	1
48	21G-80504	DX1s	0	0	1
49	21G-80504	DX1s	0	0	1
50	21G-80504	DX1s	1	0	0
51	21G-80504	DX1s	1	0	0
52	21G-80504	DX1s	1	0	0
53	21G-80504	DX1s	1	0	0
54	21G-80504	DX1s	0	1	0
55	21G-80504	DX1s	1	0	0
56	21G-80504	DX1s	0	1	0
57	21G-80504	DX1s	1	0	0
58	21G-80504	DX1s	0	0	1
59	21G-80504	DX1s	1	0	0
60	21G-80504	DX1s	0	1	0
61	21G-80504	DX1s	0	0	1
62	21G-80504	DX1s	0	0	1
63	21G-80504	DX1s	0	1	0
64	21G-80504	DX1s	0	1	0
65	21G-80504	DX1s	0	0	1
66	21G-80504	DX1s	1	0	0
67	21G-80504	DX1s	1	0	0
68	21G-80504	DX1s	0	0	1
69	21G-80504	DX1s	0	0	1
70	21G-80504	DX1s	0	0	1
71	21G-80504	DX1s	0	1	0
72	21G-80504	DX1s	1	0	0
73	21G-80504	DX1s	1	0	0
74	21G-80504	DX1s	0	0	1
75	21G-80504	DX1s	0	0	1
76	21G-80504	DX1s	0	1	0
77	21G-80504	DX1s	0	0	1
78	21G-80504	DX1s	0	0	1
79	21G-80504	DX1s	0	1	0
80	21G-80504	DX1s	0	1	0
81	21G-80504	DX1s	1	0	0
82	21G-80504	DX1s	0	0	1
83	21G-80504	DX1s	1	0	0
84	21G-80504	DX1s	1	0	0
85	21G-80504	DX1s	0	0	1
86	21G-80504	DX1s	0	1	0
87	21G-80504	DX1s	0	1	0
88	21G-80504	DX1s	0	0	1
89	21G-80504	DX1s	0	0	1
90	21G-80504	DX1s	0	0	1
91	21G-80504	DX1s	0	0	1
92	21G-80504	DX1s	0	1	0
93	21G-80504	DX1s	1	0	0
94	21G-80504	DX1s	1	0	0
95	21G-80504	DX1s	0	0	1
96	21G-80504	DX1s	1	0	0
97	21G-80504	DX1s	0	1	0
98	21G-80504	DX1s	0	1	0
99	21G-80504	DX1s	1	0	0
100	21G-80504	DX1s	0	1	0
1	21G-80505	DX1s	0	1	0
2	21G-80505	DX1s	0	0	1
3	21G-80505	DX1s	0	1	0
4	21G-80505	DX1s	0	0	1
5	21G-80505	DX1s	1	0	0
6	21G-80505	DX1s	0	0	1
7	21G-80505	DX1s	0	0	1
8	21G-80505	DX1s	0	0	1
9	21G-80505	DX1s	0	0	1
10	21G-80505	DX1s	1	0	0
11	21G-80505	DX1s	0	1	0
12	21G-80505	DX1s	0	1	0
13	21G-80505	DX1s	0	1	0
14	21G-80505	DX1s	0	0	1
15	21G-80505	DX1s	0	0	1
16	21G-80505	DX1s	0	1	0
17	21G-80505	DX1s	0	0	1
18	21G-80505	DX1s	0	0	1
19	21G-80505	DX1s	1	0	0
20	21G-80505	DX1s	1	0	0
21	21G-80505	DX1s	0	0	1
22	21G-80505	DX1s	0	1	0
23	21G-80505	DX1s	0	0	1
24	21G-80505	DX1s	0	1	0
25	21G-80505	DX1s	0	1	0
26	21G-80505	DX1s	0	0	1
27	21G-80505	DX1s	0	0	1
28	21G-80505	DX1s	0	1	0
29	21G-80505	DX1s	0	1	0
30	21G-80505	DX1s	0	0	1
31	21G-80505	DX1s	1	0	0
32	21G-80505	DX1s	0	1	0
33	21G-80505	DX1s	1	0	0
34	21G-80505	DX1s	1	0	0
35	21G-80505	DX1s	0	0	1
36	21G-80505	DX1s	0	0	1
37	21G-80505	DX1s	0	0	1
38	21G-80505	DX1s	0	1	0
39	21G-80505	DX1s	0	0	1
40	21G-80505	DX1s	0	1	0
41	21G-80505	DX1s	0	1	0
42	21G-80505	DX1s	1	0	0
43	21G-80505	DX1s	1	0	0
44	21G-80505	DX1s	0	0	1
45	21G-80505	DX1s	0	1	0
46	21G-80505	DX1s	0	1	0
47	21G-80505	DX1s	0	0	1
48	21G-80505	DX1s	0	1	0
49	21G-80505	DX1s	0	1	0
50	21G-80505	DX1s	0	0	1
51	21G-80505	DX1s	0	1	0
52	21G-80505	DX1s	1	0	0
53	21G-80505	DX1s	1	0	0
54	21G-80505	DX1s	0	1	0
55	21G-80505	DX1s	0	1	0
56	21G-80505	DX1s	0	1	0
57	21G-80505	DX1s	0	1	0
58	21G-80505	DX1s	0	0	1
59	21G-80505	DX1s	0	1	0
60	21G-80505	DX1s	0	0	1
61	21G-80505	DX1s	0	1	0
62	21G-80505	DX1s	0	1	0
63	21G-80505	DX1s	0	0	1
64	21G-80505	DX1s	0	1	0
65	21G-80505	DX1s	0	0	1
66	21G-80505	DX1s	0	0	1
67	21G-80505	DX1s	0	1	0
68	21G-80505	DX1s	1	0	0
69	21G-80505	DX1s	0	0	1
70	21G-80505	DX1s	0	1	0
71	21G-80505	DX1s	0	0	1
72	21G-80505	DX1s	1	0	0
73	21G-80505	DX1s	1	0	0
74	21G-80505	DX1s	0	1	0
75	21G-80505	DX1s	1	0	0
76	21G-80505	DX1s	0	0	1
77	21G-80505	DX1s	0	1	0
78	21G-80505	DX1s	0	0	1
79	21G-80505	DX1s	0	0	1
80	21G-80505	DX1s	1	0	0
81	21G-80505	DX1s	0	1	0
82	21G-80505	DX1s	0	0	1
83	21G-80505	DX1s	0	1	0
84	21G-80505	DX1s	0	1	0
85	21G-80505	DX1s	0	1	0
86	21G-80505	DX1s	0	1	0
87	21G-80505	DX1s	0	1	0
88	21G-80505	DX1s	1	0	0
89	21G-80505	DX1s	0	1	0
90	21G-80505	DX1s	0	0	1
91	21G-80505	DX1s	0	1	0
92	21G-80505	DX1s	0	1	0
93	21G-80505	DX1s	1	0	0
94	21G-80505	DX1s	0	1	0
95	21G-80505	DX1s	0	1	0
96	21G-80505	DX1s	0	1	0
97	21G-80505	DX1s	1	0	0
98	21G-80505	DX1s	1	0	0
99	21G-80505	DX1s	1	0	0
100	21G-80505	DX1s	1	0	0
1	21G-80506	DX1s	0	0	1
2	21G-80506	DX1s	1	0	0
3	21G-80506	DX1s	0	0	1
4	21G-80506	DX1s	0	0	1
5	21G-80506	DX1s	1	0	0
6	21G-80506	DX1s	0	0	1
7	21G-80506	DX1s	1	0	0
8	21G-80506	DX1s	0	1	0
9	21G-80506	DX1s	0	0	1
10	21G-80506	DX1s	1	0	0
11	21G-80506	DX1s	0	0	1
12	21G-80506	DX1s	1	0	0
13	21G-80506	DX1s	1	0	0
14	21G-80506	DX1s	0	1	0
15	21G-80506	DX1s	0	1	0
16	21G-80506	DX1s	1	0	0
17	21G-80506	DX1s	0	0	1
18	21G-80506	DX1s	1	0	0
19	21G-80506	DX1s	0	1	0
20	21G-80506	DX1s	1	0	0
21	21G-80506	DX1s	0	1	0
22	21G-80506	DX1s	0	1	0
23	21G-80506	DX1s	1	0	0
24	21G-80506	DX1s	0	1	0
25	21G-80506	DX1s	0	1	0
26	21G-80506	DX1s	1	0	0
27	21G-80506	DX1s	0	0	1
28	21G-80506	DX1s	0	1	0
29	21G-80506	DX1s	0	1	0
30	21G-80506	DX1s	0	1	0
31	21G-80506	DX1s	0	0	1
32	21G-80506	DX1s	0	1	0
33	21G-80506	DX1s	0	1	0
34	21G-80506	DX1s	1	0	0
35	21G-80506	DX1s	0	1	0
36	21G-80506	DX1s	0	0	1
37	21G-80506	DX1s	0	0	1
38	21G-80506	DX1s	0	1	0
39	21G-80506	DX1s	1	0	0
40	21G-80506	DX1s	0	1	0
41	21G-80506	DX1s	0	1	0
42	21G-80506	DX1s	1	0	0
43	21G-80506	DX1s	0	1	0
44	21G-80506	DX1s	1	0	0
45	21G-80506	DX1s	0	1	0
46	21G-80506	DX1s	0	1	0
47	21G-80506	DX1s	0	1	0
48	21G-80506	DX1s	0	1	0
49	21G-80506	DX1s	0	0	1
50	21G-80506	DX1s	1	0	0
51	21G-80506	DX1s	0	1	0
52	21G-80506	DX1s	0	1	0
53	21G-80506	DX1s	0	0	1
54	21G-80506	DX1s	1	0	0
55	21G-80506	DX1s	0	0	1
56	21G-80506	DX1s	0	1	0
57	21G-80506	DX1s	0	1	0
58	21G-80506	DX1s	0	0	1
59	21G-80506	DX1s	1	0	0
60	21G-80506	DX1s	0	1	0
61	21G-80506	DX1s	0	1	0
62	21G-80506	DX1s	0	1	0
63	21G-80506	DX1s	0	0	1
64	21G-80506	DX1s	0	0	1
65	21G-80506	DX1s	0	0	1
66	21G-80506	DX1s	0	1	0
67	21G-80506	DX1s	1	0	0
68	21G-80506	DX1s	1	0	0
69	21G-80506	DX1s	0	0	1
70	21G-80506	DX1s	0	1	0
71	21G-80506	DX1s	1	0	0
72	21G-80506	DX1s	0	0	1
73	21G-80506	DX1s	1	0	0
74	21G-80506	DX1s	0	1	0
75	21G-80506	DX1s	1	0	0
76	21G-80506	DX1s	1	0	0
77	21G-80506	DX1s	0	0	1
78	21G-80506	DX1s	0	1	0
79	21G-80506	DX1s	0	0	1
80	21G-80506	DX1s	0	1	0
81	21G-80506	DX1s	1	0	0
82	21G-80506	DX1s	0	0	1
83	21G-80506	DX1s	0	0	1
84	21G-80506	DX1s	0	0	1
85	21G-80506	DX1s	0	1	0
86	21G-80506	DX1s	0	1	0
87	21G-80506	DX1s	0	0	1
88	21G-80506	DX1s	0	0	1
89	21G-80506	DX1s	0	1	0
90	21G-80506	DX1s	0	0	1
91	21G-80506	DX1s	0	1	0
92	21G-80506	DX1s	0	0	1
93	21G-80506	DX1s	0	0	1
94	21G-80506	DX1s	0	1	0
95	21G-80506	DX1s	1	0	0
96	21G-80506	DX1s	0	1	0
97	21G-80506	DX1s	0	0	1
98	21G-80506	DX1s	0	0	1
99	21G-80506	DX1s	1	0	0
100	21G-80506	DX1s	1	0	0
1	21G-81644	DX1s	0	0	1
2	21G-81644	DX1s	0	1	0
3	21G-81644	DX1s	0	0	1
4	21G-81644	DX1s	0	0	1
5	21G-81644	DX1s	0	0	1
6	21G-81644	DX1s	0	0	1
7	21G-81644	DX1s	0	1	0
8	21G-81644	DX1s	0	0	1
9	21G-81644	DX1s	0	1	0
10	21G-81644	DX1s	0	0	1
11	21G-81644	DX1s	0	1	0
12	21G-81644	DX1s	0	1	0
13	21G-81644	DX1s	0	1	0
14	21G-81644	DX1s	0	1	0
15	21G-81644	DX1s	1	0	0
16	21G-81644	DX1s	0	0	1
17	21G-81644	DX1s	0	1	0
18	21G-81644	DX1s	0	1	0
19	21G-81644	DX1s	0	0	1
20	21G-81644	DX1s	0	0	1
21	21G-81644	DX1s	0	1	0
22	21G-81644	DX1s	1	0	0
23	21G-81644	DX1s	0	1	0
24	21G-81644	DX1s	0	1	0
25	21G-81644	DX1s	0	1	0
26	21G-81644	DX1s	1	0	0
27	21G-81644	DX1s	0	1	0
28	21G-81644	DX1s	0	1	0
29	21G-81644	DX1s	0	0	1
30	21G-81644	DX1s	0	0	1
31	21G-81644	DX1s	0	0	1
32	21G-81644	DX1s	0	0	1
33	21G-81644	DX1s	0	1	0
34	21G-81644	DX1s	0	0	1
35	21G-81644	DX1s	0	0	1
36	21G-81644	DX1s	1	0	0
37	21G-81644	DX1s	1	0	0
38	21G-81644	DX1s	0	0	1
39	21G-81644	DX1s	1	0	0
40	21G-81644	DX1s	0	0	1
41	21G-81644	DX1s	0	0	1
42	21G-81644	DX1s	0	0	1
43	21G-81644	DX1s	1	0	0
44	21G-81644	DX1s	1	0	0
45	21G-81644	DX1s	1	0	0
46	21G-81644	DX1s	0	0	1
47	21G-81644	DX1s	0	1	0
48	21G-81644	DX1s	0	1	0
49	21G-81644	DX1s	0	1	0
50	21G-81644	DX1s	1	0	0
51	21G-81644	DX1s	0	1	0
52	21G-81644	DX1s	0	0	1
53	21G-81644	DX1s	0	1	0
54	21G-81644	DX1s	0	0	1
55	21G-81644	DX1s	1	0	0
56	21G-81644	DX1s	0	1	0
57	21G-81644	DX1s	0	1	0
58	21G-81644	DX1s	0	0	1
59	21G-81644	DX1s	0	0	1
60	21G-81644	DX1s	0	1	0
61	21G-81644	DX1s	0	0	1
62	21G-81644	DX1s	0	1	0
63	21G-81644	DX1s	1	0	0
64	21G-81644	DX1s	0	0	1
65	21G-81644	DX1s	0	1	0
66	21G-81644	DX1s	1	0	0
67	21G-81644	DX1s	0	1	0
68	21G-81644	DX1s	0	0	1
69	21G-81644	DX1s	0	0	1
70	21G-81644	DX1s	0	1	0
71	21G-81644	DX1s	0	0	1
72	21G-81644	DX1s	1	0	0
73	21G-81644	DX1s	0	1	0
74	21G-81644	DX1s	0	1	0
75	21G-81644	DX1s	1	0	0
76	21G-81644	DX1s	1	0	0
77	21G-81644	DX1s	0	1	0
78	21G-81644	DX1s	0	0	1
79	21G-81644	DX1s	0	0	1
80	21G-81644	DX1s	1	0	0
81	21G-81644	DX1s	1	0	0
82	21G-81644	DX1s	0	0	1
83	21G-81644	DX1s	0	1	0
84	21G-81644	DX1s	0	1	0
85	21G-81644	DX1s	0	1	0
86	21G-81644	DX1s	0	0	1
87	21G-81644	DX1s	0	0	1
88	21G-81644	DX1s	0	0	1
89	21G-81644	DX1s	0	0	1
90	21G-81644	DX1s	0	1	0
91	21G-81644	DX1s	0	0	1
92	21G-81644	DX1s	0	0	1
93	21G-81644	DX1s	0	1	0
94	21G-81644	DX1s	0	1	0
95	21G-81644	DX1s	0	1	0
96	21G-81644	DX1s	0	0	1
97	21G-81644	DX1s	0	0	1
98	21G-81644	DX1s	0	0	1
99	21G-81644	DX1s	0	1	0
100	21G-81644	DX1s	0	0	1
1	21G-96021	DX64-69	0	1	0
2	21G-96021	DX64-69	0	1	0
3	21G-96021	DX64-69	1	0	0
4	21G-96021	DX64-69	1	0	0
5	21G-96021	DX64-69	0	0	1
6	21G-96021	DX64-69	0	0	1
7	21G-96021	DX64-69	0	0	1
8	21G-96021	DX64-69	0	1	0
9	21G-96021	DX64-69	1	0	0
10	21G-96021	DX64-69	0	1	0
11	21G-96021	DX64-69	1	0	0
12	21G-96021	DX64-69	0	1	0
13	21G-96021	DX64-69	0	0	1
14	21G-96021	DX64-69	1	0	0
15	21G-96021	DX64-69	0	1	0
16	21G-96021	DX64-69	1	0	0
17	21G-96021	DX64-69	1	0	0
18	21G-96021	DX64-69	1	0	0
19	21G-96021	DX64-69	1	0	0
20	21G-96021	DX64-69	1	0	0
21	21G-96021	DX64-69	0	1	0
22	21G-96021	DX64-69	0	1	0
23	21G-96021	DX64-69	0	1	0
24	21G-96021	DX64-69	0	1	0
25	21G-96021	DX64-69	0	0	1
26	21G-96021	DX64-69	1	0	0
27	21G-96021	DX64-69	1	0	0
28	21G-96021	DX64-69	1	0	0
29	21G-96021	DX64-69	1	0	0
30	21G-96021	DX64-69	1	0	0
31	21G-96021	DX64-69	1	0	0
32	21G-96021	DX64-69	1	0	0
33	21G-96021	DX64-69	1	0	0
34	21G-96021	DX64-69	0	0	1
35	21G-96021	DX64-69	1	0	0
36	21G-96021	DX64-69	0	1	0
37	21G-96021	DX64-69	0	0	1
38	21G-96021	DX64-69	0	1	0
39	21G-96021	DX64-69	1	0	0
40	21G-96021	DX64-69	0	0	1
41	21G-96021	DX64-69	1	0	0
42	21G-96021	DX64-69	1	0	0
43	21G-96021	DX64-69	1	0	0
44	21G-96021	DX64-69	1	0	0
45	21G-96021	DX64-69	1	0	0
46	21G-96021	DX64-69	1	0	0
47	21G-96021	DX64-69	0	0	1
48	21G-96021	DX64-69	1	0	0
49	21G-96021	DX64-69	0	1	0
50	21G-96021	DX64-69	0	0	1
51	21G-96021	DX64-69	1	0	0
52	21G-96021	DX64-69	1	0	0
53	21G-96021	DX64-69	1	0	0
54	21G-96021	DX64-69	1	0	0
55	21G-96021	DX64-69	1	0	0
56	21G-96021	DX64-69	0	1	0
57	21G-96021	DX64-69	0	1	0
58	21G-96021	DX64-69	0	1	0
59	21G-96021	DX64-69	1	0	0
60	21G-96021	DX64-69	1	0	0
61	21G-96021	DX64-69	1	0	0
62	21G-96021	DX64-69	1	0	0
63	21G-96021	DX64-69	0	1	0
64	21G-96021	DX64-69	0	1	0
65	21G-96021	DX64-69	0	0	1
66	21G-96021	DX64-69	1	0	0
67	21G-96021	DX64-69	1	0	0
68	21G-96021	DX64-69	1	0	0
69	21G-96021	DX64-69	0	1	0
70	21G-96021	DX64-69	1	0	0
71	21G-96021	DX64-69	1	0	0
72	21G-96021	DX64-69	1	0	0
73	21G-96021	DX64-69	1	0	0
74	21G-96021	DX64-69	1	0	0
75	21G-96021	DX64-69	1	0	0
76	21G-96021	DX64-69	1	0	0
77	21G-96021	DX64-69	1	0	0
78	21G-96021	DX64-69	1	0	0
79	21G-96021	DX64-69	1	0	0
80	21G-96021	DX64-69	1	0	0
81	21G-96021	DX64-69	1	0	0
82	21G-96021	DX64-69	1	0	0
83	21G-96021	DX64-69	0	0	1
84	21G-96021	DX64-69	0	0	1
85	21G-96021	DX64-69	0	0	1
86	21G-96021	DX64-69	1	0	0
87	21G-96021	DX64-69	1	0	0
88	21G-96021	DX64-69	1	0	0
89	21G-96021	DX64-69	0	1	0
90	21G-96021	DX64-69	1	0	0
91	21G-96021	DX64-69	1	0	0
92	21G-96021	DX64-69	1	0	0
93	21G-96021	DX64-69	0	1	0
94	21G-96021	DX64-69	0	0	1
95	21G-96021	DX64-69	1	0	0
96	21G-96021	DX64-69	0	0	1
97	21G-96021	DX64-69	0	1	0
98	21G-96021	DX64-69	1	0	0
99	21G-96021	DX64-69	0	0	1
100	21G-96021	DX64-69	1	0	0
1	21G-96022	DX64-69	1	0	0
2	21G-96022	DX64-69	0	1	0
3	21G-96022	DX64-69	1	0	0
4	21G-96022	DX64-69	0	1	0
5	21G-96022	DX64-69	0	1	0
6	21G-96022	DX64-69	1	0	0
7	21G-96022	DX64-69	1	0	0
8	21G-96022	DX64-69	0	0	1
9	21G-96022	DX64-69	0	1	0
10	21G-96022	DX64-69	0	1	0
11	21G-96022	DX64-69	1	0	0
12	21G-96022	DX64-69	0	0	1
13	21G-96022	DX64-69	1	0	0
14	21G-96022	DX64-69	1	0	0
15	21G-96022	DX64-69	1	0	0
16	21G-96022	DX64-69	1	0	0
17	21G-96022	DX64-69	1	0	0
18	21G-96022	DX64-69	1	0	0
19	21G-96022	DX64-69	1	0	0
20	21G-96022	DX64-69	0	0	1
21	21G-96022	DX64-69	1	0	0
22	21G-96022	DX64-69	1	0	0
23	21G-96022	DX64-69	0	0	1
24	21G-96022	DX64-69	0	1	0
25	21G-96022	DX64-69	1	0	0
26	21G-96022	DX64-69	0	0	1
27	21G-96022	DX64-69	0	1	0
28	21G-96022	DX64-69	0	0	1
29	21G-96022	DX64-69	1	0	0
30	21G-96022	DX64-69	1	0	0
31	21G-96022	DX64-69	1	0	0
32	21G-96022	DX64-69	1	0	0
33	21G-96022	DX64-69	1	0	0
34	21G-96022	DX64-69	0	1	0
35	21G-96022	DX64-69	1	0	0
36	21G-96022	DX64-69	0	1	0
37	21G-96022	DX64-69	1	0	0
38	21G-96022	DX64-69	1	0	0
39	21G-96022	DX64-69	0	1	0
40	21G-96022	DX64-69	0	0	1
41	21G-96022	DX64-69	1	0	0
42	21G-96022	DX64-69	1	0	0
43	21G-96022	DX64-69	0	0	1
44	21G-96022	DX64-69	0	0	1
45	21G-96022	DX64-69	1	0	0
46	21G-96022	DX64-69	1	0	0
47	21G-96022	DX64-69	1	0	0
48	21G-96022	DX64-69	1	0	0
49	21G-96022	DX64-69	0	0	1
50	21G-96022	DX64-69	0	1	0
51	21G-96022	DX64-69	0	0	1
52	21G-96022	DX64-69	1	0	0
53	21G-96022	DX64-69	1	0	0
54	21G-96022	DX64-69	1	0	0
55	21G-96022	DX64-69	0	1	0
56	21G-96022	DX64-69	1	0	0
57	21G-96022	DX64-69	1	0	0
58	21G-96022	DX64-69	0	1	0
59	21G-96022	DX64-69	0	1	0
60	21G-96022	DX64-69	1	0	0
61	21G-96022	DX64-69	1	0	0
62	21G-96022	DX64-69	1	0	0
63	21G-96022	DX64-69	1	0	0
64	21G-96022	DX64-69	0	0	1
65	21G-96022	DX64-69	0	1	0
66	21G-96022	DX64-69	1	0	0
67	21G-96022	DX64-69	0	1	0
68	21G-96022	DX64-69	0	1	0
69	21G-96022	DX64-69	0	1	0
70	21G-96022	DX64-69	1	0	0
71	21G-96022	DX64-69	1	0	0
72	21G-96022	DX64-69	1	0	0
73	21G-96022	DX64-69	1	0	0
74	21G-96022	DX64-69	1	0	0
75	21G-96022	DX64-69	1	0	0
76	21G-96022	DX64-69	1	0	0
77	21G-96022	DX64-69	0	1	0
78	21G-96022	DX64-69	0	1	0
79	21G-96022	DX64-69	1	0	0
80	21G-96022	DX64-69	1	0	0
81	21G-96022	DX64-69	1	0	0
82	21G-96022	DX64-69	0	1	0
83	21G-96022	DX64-69	1	0	0
84	21G-96022	DX64-69	0	0	1
85	21G-96022	DX64-69	1	0	0
86	21G-96022	DX64-69	0	0	1
87	21G-96022	DX64-69	1	0	0
88	21G-96022	DX64-69	1	0	0
89	21G-96022	DX64-69	0	1	0
90	21G-96022	DX64-69	0	1	0
91	21G-96022	DX64-69	0	1	0
92	21G-96022	DX64-69	0	0	1
93	21G-96022	DX64-69	1	0	0
94	21G-96022	DX64-69	0	1	0
95	21G-96022	DX64-69	1	0	0
96	21G-96022	DX64-69	0	1	0
97	21G-96022	DX64-69	1	0	0
98	21G-96022	DX64-69	1	0	0
99	21G-96022	DX64-69	1	0	0
100	21G-96022	DX64-69	0	1	0
1	21G-96023	DX64-69	0	0	1
2	21G-96023	DX64-69	0	0	1
3	21G-96023	DX64-69	0	1	0
4	21G-96023	DX64-69	0	0	1
5	21G-96023	DX64-69	0	0	1
6	21G-96023	DX64-69	0	0	1
7	21G-96023	DX64-69	1	0	0
8	21G-96023	DX64-69	1	0	0
9	21G-96023	DX64-69	1	0	0
10	21G-96023	DX64-69	1	0	0
11	21G-96023	DX64-69	0	0	1
12	21G-96023	DX64-69	0	0	1
13	21G-96023	DX64-69	1	0	0
14	21G-96023	DX64-69	0	0	1
15	21G-96023	DX64-69	1	0	0
16	21G-96023	DX64-69	0	0	1
17	21G-96023	DX64-69	1	0	0
18	21G-96023	DX64-69	1	0	0
19	21G-96023	DX64-69	1	0	0
20	21G-96023	DX64-69	0	1	0
21	21G-96023	DX64-69	1	0	0
22	21G-96023	DX64-69	1	0	0
23	21G-96023	DX64-69	1	0	0
24	21G-96023	DX64-69	0	1	0
25	21G-96023	DX64-69	0	1	0
26	21G-96023	DX64-69	1	0	0
27	21G-96023	DX64-69	1	0	0
28	21G-96023	DX64-69	1	0	0
29	21G-96023	DX64-69	1	0	0
30	21G-96023	DX64-69	0	1	0
31	21G-96023	DX64-69	0	1	0
32	21G-96023	DX64-69	1	0	0
33	21G-96023	DX64-69	0	1	0
34	21G-96023	DX64-69	0	1	0
35	21G-96023	DX64-69	1	0	0
36	21G-96023	DX64-69	1	0	0
37	21G-96023	DX64-69	1	0	0
38	21G-96023	DX64-69	1	0	0
39	21G-96023	DX64-69	0	1	0
40	21G-96023	DX64-69	1	0	0
41	21G-96023	DX64-69	1	0	0
42	21G-96023	DX64-69	1	0	0
43	21G-96023	DX64-69	1	0	0
44	21G-96023	DX64-69	0	1	0
45	21G-96023	DX64-69	0	0	1
46	21G-96023	DX64-69	1	0	0
47	21G-96023	DX64-69	0	0	1
48	21G-96023	DX64-69	1	0	0
49	21G-96023	DX64-69	1	0	0
50	21G-96023	DX64-69	1	0	0
51	21G-96023	DX64-69	1	0	0
52	21G-96023	DX64-69	1	0	0
53	21G-96023	DX64-69	1	0	0
54	21G-96023	DX64-69	1	0	0
55	21G-96023	DX64-69	1	0	0
56	21G-96023	DX64-69	1	0	0
57	21G-96023	DX64-69	0	1	0
58	21G-96023	DX64-69	0	1	0
59	21G-96023	DX64-69	0	1	0
60	21G-96023	DX64-69	0	1	0
61	21G-96023	DX64-69	1	0	0
62	21G-96023	DX64-69	1	0	0
63	21G-96023	DX64-69	1	0	0
64	21G-96023	DX64-69	1	0	0
65	21G-96023	DX64-69	0	1	0
66	21G-96023	DX64-69	1	0	0
67	21G-96023	DX64-69	0	1	0
68	21G-96023	DX64-69	0	0	1
69	21G-96023	DX64-69	1	0	0
70	21G-96023	DX64-69	1	0	0
71	21G-96023	DX64-69	0	1	0
72	21G-96023	DX64-69	0	1	0
73	21G-96023	DX64-69	0	1	0
74	21G-96023	DX64-69	1	0	0
75	21G-96023	DX64-69	0	0	1
76	21G-96023	DX64-69	1	0	0
77	21G-96023	DX64-69	0	1	0
78	21G-96023	DX64-69	0	1	0
79	21G-96023	DX64-69	0	0	1
80	21G-96023	DX64-69	0	0	1
81	21G-96023	DX64-69	1	0	0
82	21G-96023	DX64-69	0	0	1
83	21G-96023	DX64-69	1	0	0
84	21G-96023	DX64-69	1	0	0
85	21G-96023	DX64-69	0	0	1
86	21G-96023	DX64-69	1	0	0
87	21G-96023	DX64-69	1	0	0
88	21G-96023	DX64-69	1	0	0
89	21G-96023	DX64-69	0	1	0
90	21G-96023	DX64-69	0	1	0
91	21G-96023	DX64-69	0	0	1
92	21G-96023	DX64-69	1	0	0
93	21G-96023	DX64-69	0	0	1
94	21G-96023	DX64-69	1	0	0
95	21G-96023	DX64-69	1	0	0
96	21G-96023	DX64-69	0	1	0
97	21G-96023	DX64-69	1	0	0
98	21G-96023	DX64-69	1	0	0
[truncated: 402 more rows]

## Sheet: S4.3_Figure 3 - HORMAD2
S4.3 Data source for Figure 3
strain	obs_id	mouse_id	stage	total_asyn	chr_AS	partial_AS
DX1s	1	80902	pachytene	0
DX1s	2	80902	pachytene	0						LEGEND:
DX1s	3	80902	pachytene	0						strain - name of the strain
DX1s	4	80902	pachytene	0						mouse_id - mouse identification number from PyRAT system
DX1s	5	80902	pachytene	0						stage - stage of meiosis
DX1s	6	80902	pachytene	0						total_asyn - total number of asynapsed autosomes
DX1s	7	80902	pachytene	0						chr_AS - number of whole chromosome asynapsis
DX1s	8	80902	pachytene	0						partial_AS - number of partial chromosome asynapsis
DX1s	9	80902	pachytene	0
DX1s	10	80902	pachytene	0
DX1s	11	80902	pachytene	0
DX1s	12	80902	pachytene	0
DX1s	13	80902	pachytene	0
DX1s	14	80902	pachytene	0
DX1s	15	80902	pachytene	0
DX1s	16	80902	pachytene	0
DX1s	17	80902	pachytene	0
DX1s	18	80902	pachytene	0
DX1s	19	80902	pachytene	0
DX1s	20	80902	pachytene	0
DX1s	21	80902	pachytene	0
DX1s	22	80902	pachytene	0
DX1s	23	80902	pachytene	0
DX1s	24	80902	pachytene	0
DX1s	25	80902	pachytene	0
DX1s	26	80902	pachytene	0
DX1s	27	80902	pachytene	0
DX1s	28	80902	pachytene	0
DX1s	29	80902	pachytene	0
DX1s	30	80902	pachytene	0
DX1s	31	80902	pachytene	0
DX1s	32	80902	pachytene	0
DX1s	33	80902	pachytene	0
DX1s	34	80902	pachytene	0
DX1s	35	80902	pachytene	0
DX1s	36	80902	pachytene	0
DX1s	37	80902	pachytene	0
DX1s	38	80902	pachytene	0
DX1s	39	80902	pachytene	0
DX1s	40	80902	pachytene	0
DX1s	41	80902	pachytene	0
DX1s	42	80902	pachytene	0
DX1s	43	80902	pachytene	0
DX1s	44	80902	pachytene	0
DX1s	45	80902	pachytene	0
DX1s	46	80902	pachytene	0
DX1s	47	80902	pachytene	0
DX1s	48	80902	pachytene	0
DX1s	49	80902	pachytene	0
DX1s	50	80902	pachytene	0
DX1s	51	80902	pachytene	0
DX1s	52	80902	pachytene	0
DX1s	53	80902	pachytene	0
DX1s	54	80902	pachytene	0
DX1s	55	80902	pachytene	0
DX1s	56	80902	pachytene	0
DX1s	57	80902	pachytene	0
DX1s	58	80902	pachytene	0
DX1s	59	80902	pachytene	1	1	0
DX1s	60	80902	pachytene	0
DX1s	61	80902	pachytene	0
DX1s	62	80902	pachytene	0
DX1s	63	80902	pachytene	0
DX1s	64	80902	pachytene	0
DX1s	65	80902	pachytene	0
DX1s	66	80902	pachytene	0
DX1s	67	80902	pachytene	0
DX1s	68	80902	pachytene	0
DX1s	69	80902	pachytene	0
DX1s	70	80902	pachytene	0
DX1s	71	80902	pachytene	0
DX1s	72	80902	pachytene	0
DX1s	73	80902	pachytene	0
DX1s	1	80903	pachytene	1	1	0
DX1s	2	80903	pachytene	0
DX1s	3	80903	pachytene	0
DX1s	4	80903	pachytene	0
DX1s	5	80903	pachytene	0
DX1s	6	80903	pachytene	0
DX1s	7	80903	pachytene	0
DX1s	8	80903	pachytene	0
DX1s	9	80903	pachytene	0
DX1s	10	80903	pachytene	0
DX1s	11	80903	pachytene	0
DX1s	12	80903	pachytene	0
DX1s	13	80903	pachytene	0
DX1s	14	80903	pachytene	0
DX1s	15	80903	pachytene	0
DX1s	16	80903	pachytene	0
DX1s	17	80903	pachytene	0
DX1s	18	80903	pachytene	0
DX1s	19	80903	pachytene	0
DX1s	20	80903	pachytene	0
DX1s	21	80903	pachytene	0
DX1s	22	80903	pachytene	0
DX1s	23	80903	pachytene	0
DX1s	24	80903	pachytene	0
DX1s	25	80903	pachytene	0
DX1s	26	80903	pachytene	0
DX1s	27	80903	pachytene	0
DX1s	28	80903	pachytene	1	0	1
DX1s	29	80903	pachytene	0
DX1s	30	80903	pachytene	0
DX1s	31	80903	pachytene	0
DX1s	32	80903	pachytene	0
DX1s	33	80903	pachytene	0
DX1s	34	80903	pachytene	0
DX1s	35	80903	pachytene	0
DX1s	36	80903	pachytene	0
DX1s	37	80903	pachytene	0
DX1s	38	80903	pachytene	0
DX1s	39	80903	pachytene	0
DX1s	40	80903	pachytene	0
DX1s	41	80903	pachytene	0
DX1s	42	80903	pachytene	0
DX1s	43	80903	pachytene	0
DX1s	44	80903	pachytene	0
DX1s	45	80903	pachytene	0
DX1s	46	80903	pachytene	0
DX1s	47	80903	pachytene	0
DX1s	48	80903	pachytene	0
DX1s	49	80903	pachytene	0
DX1s	50	80903	pachytene	0
DX1s	51	80903	pachytene	0
DX1s	52	80903	pachytene	0
DX1s	53	80903	pachytene	0
DX1s	54	80903	pachytene	0
DX1s	55	80903	pachytene	0
DX1s	56	80903	pachytene	0
DX1s	57	80903	pachytene	0
DX1s	58	80903	pachytene	0
DX1s	59	80903	pachytene	0
DX1s	60	80903	pachytene	0
DX1s	61	80903	pachytene	0
DX1s	62	80903	pachytene	0
DX1s	63	80903	pachytene	0
DX1s	64	80903	pachytene	0
DX1s	65	80903	pachytene	0
DX1s	66	80903	pachytene	0
DX1s	67	80903	pachytene	0
DX1s	68	80903	pachytene	0
DX1s	69	80903	pachytene	0
DX1s	1	80904	pachytene	0
DX1s	2	80904	pachytene	0
DX1s	3	80904	pachytene	0
DX1s	4	80904	pachytene	0
DX1s	5	80904	pachytene	0
DX1s	6	80904	pachytene	0
DX1s	7	80904	pachytene	0
DX1s	8	80904	pachytene	0
DX1s	9	80904	pachytene	0
DX1s	10	80904	pachytene	0
DX1s	11	80904	pachytene	0
DX1s	12	80904	pachytene	0
DX1s	13	80904	pachytene	0
DX1s	14	80904	pachytene	0
DX1s	15	80904	pachytene	0
DX1s	16	80904	pachytene	0
DX1s	17	80904	pachytene	0
DX1s	18	80904	pachytene	0
DX1s	19	80904	pachytene	0
DX1s	20	80904	pachytene	0
DX1s	21	80904	pachytene	0
DX1s	22	80904	pachytene	0
DX1s	23	80904	pachytene	0
DX1s	24	80904	pachytene	0
DX1s	25	80904	pachytene	0
DX1s	26	80904	pachytene	0
DX1s	27	80904	pachytene	0
DX1s	28	80904	pachytene	0
DX1s	29	80904	pachytene	0
DX1s	30	80904	pachytene	0
DX1s	31	80904	pachytene	0
DX1s	32	80904	pachytene	0
DX1s	33	80904	pachytene	0
DX1s	34	80904	pachytene	0
DX1s	35	80904	pachytene	0
DX1s	36	80904	pachytene	0
DX1s	37	80904	pachytene	0
DX1s	38	80904	pachytene	0
DX1s	39	80904	pachytene	0
DX1s	40	80904	pachytene	0
DX1s	41	80904	pachytene	0
DX1s	42	80904	pachytene	0
DX1s	43	80904	pachytene	0
DX1s	44	80904	pachytene	0
DX1s	45	80904	pachytene	0
DX1s	46	80904	pachytene	0
DX1s	47	80904	pachytene	0
DX1s	48	80904	pachytene	0
DX1s	49	80904	pachytene	0
DX1s	50	80904	pachytene	0
DX1s	51	80904	pachytene	0
DX1s	52	80904	pachytene	0
DX1s	53	80904	pachytene	0
DX1s	54	80904	pachytene	0
DX1s	55	80904	pachytene	0
DX1s	56	80904	pachytene	0
DX1s	57	80904	pachytene	0
DX1s	58	80904	pachytene	0
DX1s	59	80904	pachytene	0
DX1s	60	80904	pachytene	0
(B6 x PWD)F1	1	83089	pachytene	1	0	1
(B6 x PWD)F1	2	83089	pachytene	1	1	0
(B6 x PWD)F1	3	83089	pachytene	0	0	0
(B6 x PWD)F1	4	83089	pachytene	0	0	0
(B6 x PWD)F1	5	83089	pachytene	1	1	0
(B6 x PWD)F1	6	83089	pachytene	0	0	0
(B6 x PWD)F1	7	83089	pachytene	0	0	0
(B6 x PWD)F1	8	83089	pachytene	1	1	0
(B6 x PWD)F1	9	83089	pachytene	0	0	0
(B6 x PWD)F1	10	83089	pachytene	1	1	0
(B6 x PWD)F1	11	83089	pachytene	0	0	0
(B6 x PWD)F1	12	83089	pachytene	0	0	0
(B6 x PWD)F1	13	83089	pachytene	1	1	0
(B6 x PWD)F1	14	83089	pachytene	0	0	0
(B6 x PWD)F1	15	83089	pachytene	0	0	0
(B6 x PWD)F1	16	83089	pachytene	2	2	0
(B6 x PWD)F1	17	83089	pachytene	0	0	0
(B6 x PWD)F1	18	83089	pachytene	1	1	0
(B6 x PWD)F1	19	83089	pachytene	1	0	1
(B6 x PWD)F1	20	83089	pachytene	2	2	0
(B6 x PWD)F1	21	83089	pachytene	0	0	0
(B6 x PWD)F1	22	83089	pachytene	1	1	0
(B6 x PWD)F1	23	83089	pachytene	1	1	0
(B6 x PWD)F1	24	83089	pachytene	0	0	0
(B6 x PWD)F1	25	83089	pachytene	0	0	0
(B6 x PWD)F1	26	83089	pachytene	0	0	0
(B6 x PWD)F1	27	83089	pachytene	0	0	0
(B6 x PWD)F1	28	83089	pachytene	1	1	0
(B6 x PWD)F1	29	83089	pachytene	1	1	0
(B6 x PWD)F1	30	83089	pachytene	0	0	0
(B6 x PWD)F1	31	83089	pachytene	1	1	0
(B6 x PWD)F1	32	83089	pachytene	2	1	1
(B6 x PWD)F1	33	83089	pachytene	0	0	0
(B6 x PWD)F1	34	83089	pachytene	1	1	0
(B6 x PWD)F1	35	83089	pachytene	0	0	0
(B6 x PWD)F1	36	83089	pachytene	0	0	0
(B6 x PWD)F1	37	83089	pachytene	1	1	0
(B6 x PWD)F1	38	83089	pachytene	0	0	0
(B6 x PWD)F1	39	83089	pachytene	0	0	0
(B6 x PWD)F1	40	83089	pachytene	0	0	0
(B6 x PWD)F1	41	83089	pachytene	0	0	0
(B6 x PWD)F1	42	83089	pachytene	0	0	0
(B6 x PWD)F1	43	83089	pachytene	1	1	0
(B6 x PWD)F1	44	83089	pachytene	1	0	1
(B6 x PWD)F1	1	85328	pachytene	0	0	0
(B6 x PWD)F1	2	85328	pachytene	2	2	0
(B6 x PWD)F1	3	85328	pachytene	0	0	0
(B6 x PWD)F1	4	85328	pachytene	0	0	0
(B6 x PWD)F1	5	85328	pachytene	1	1	0
(B6 x PWD)F1	6	85328	pachytene	0	0	0
(B6 x PWD)F1	7	85328	pachytene	0	0	0
(B6 x PWD)F1	8	85328	pachytene	0	0	0
(B6 x PWD)F1	9	85328	pachytene	1	1	0
(B6 x PWD)F1	10	85328	pachytene	0	0	0
(B6 x PWD)F1	11	85328	pachytene	0	0	0
(B6 x PWD)F1	12	85328	pachytene	0	0	0
(B6 x PWD)F1	13	85328	pachytene	0	0	0
(B6 x PWD)F1	14	85328	pachytene	0	0	0
(B6 x PWD)F1	15	85328	pachytene	0	0	0
(B6 x PWD)F1	16	85328	pachytene	0	0	0
(B6 x PWD)F1	17	85328	pachytene	1	1	0
(B6 x PWD)F1	18	85328	pachytene	0	0	0
(B6 x PWD)F1	19	85328	pachytene	0	0	0
(B6 x PWD)F1	20	85328	pachytene	1	1	0
(B6 x PWD)F1	21	85328	pachytene	0	0	0
(B6 x PWD)F1	22	85328	pachytene	3	2	1
(B6 x PWD)F1	23	85328	pachytene	0	0	0
(B6 x PWD)F1	24	85328	pachytene	0	0	0
(B6 x PWD)F1	25	85328	pachytene	2	2	0
(B6 x PWD)F1	26	85328	pachytene	0	0	0
(B6 x PWD)F1	27	85328	pachytene	2	1	1
(B6 x PWD)F1	28	85328	pachytene	0	0	0
(B6 x PWD)F1	29	85328	pachytene	2	1	1
(B6 x PWD)F1	30	85328	pachytene	0	0	0
(B6 x PWD)F1	31	85328	pachytene	1	0	1
(B6 x PWD)F1	32	85328	pachytene	0	0	0
(B6 x PWD)F1	33	85328	pachytene	0	0	0
(B6 x PWD)F1	34	85328	pachytene	0	0	0
(B6 x PWD)F1	35	85328	pachytene	1	1	0
(B6 x PWD)F1	36	85328	pachytene	0	0	0
(B6 x PWD)F1	37	85328	pachytene	1	1	0
(B6 x PWD)F1	38	85328	pachytene	0	0	0
(B6 x PWD)F1	39	85328	pachytene	0	0	0
(B6 x PWD)F1	40	85328	pachytene	1	1	0
(B6 x PWD)F1	41	85328	pachytene	1	1	0
(B6 x PWD)F1	42	85328	pachytene	1	1	0
(B6 x PWD)F1	43	85328	pachytene	0	0	0
(B6 x PWD)F1	44	85328	pachytene	0	0	0
(B6 x PWD)F1	45	85328	pachytene	2	1	1
(B6 x PWD)F1	46	85328	pachytene	0	0	0
(B6 x PWD)F1	47	85328	pachytene	2	2	0
(B6 x PWD)F1	48	85328	pachytene	0	0	0
(B6 x PWD)F1	49	85328	pachytene	0	0	0
(B6 x PWD)F1	50	85328	pachytene	0	0	0
(B6 x PWD)F1	51	85328	pachytene	0	0	0
(B6 x PWD)F1	52	85328	pachytene	2	1	1
(B6 x PWD)F1	53	85328	pachytene	2	2	0
(B6 x PWD)F1	54	85328	pachytene	0	0	0
(B6 x PWD)F1	1	85330	pachytene	1	1	0
(B6 x PWD)F1	2	85330	pachytene	2	1	1
(B6 x PWD)F1	3	85330	pachytene	0	0	0
(B6 x PWD)F1	4	85330	pachytene	0	0	0
(B6 x PWD)F1	5	85330	pachytene	0	0	0
(B6 x PWD)F1	6	85330	pachytene	0	0	0
(B6 x PWD)F1	7	85330	pachytene	0	0	0
(B6 x PWD)F1	8	85330	pachytene	1	1	0
(B6 x PWD)F1	9	85330	pachytene	0	0	0
(B6 x PWD)F1	10	85330	pachytene	3	2	1
(B6 x PWD)F1	11	85330	pachytene	0	0	0
(B6 x PWD)F1	12	85330	pachytene	0	0	0
(B6 x PWD)F1	13	85330	pachytene	0	0	0
(B6 x PWD)F1	14	85330	pachytene	0	0	0
(B6 x PWD)F1	15	85330	pachytene	0	0	0
(B6 x PWD)F1	16	85330	pachytene	1	0	1
(B6 x PWD)F1	17	85330	pachytene	1	0	1
(B6 x PWD)F1	18	85330	pachytene	1	1	0
(B6 x PWD)F1	19	85330	pachytene	0	0	0
(B6 x PWD)F1	20	85330	pachytene	0	0	0
(B6 x PWD)F1	21	85330	pachytene	1	1	0
(B6 x PWD)F1	22	85330	pachytene	0	0	0
(B6 x PWD)F1	23	85330	pachytene	0	0	0
(B6 x PWD)F1	24	85330	pachytene	0	0	0
(B6 x PWD)F1	25	85330	pachytene	0	0	0
(B6 x PWD)F1	26	85330	pachytene	0	0	0
(B6 x PWD)F1	27	85330	pachytene	0	0	0
(B6 x PWD)F1	28	85330	pachytene	0	0	0
(B6 x PWD)F1	29	85330	pachytene	0	0	0
(B6 x PWD)F1	30	85330	pachytene	1	0	1
(B6 x PWD)F1	31	85330	pachytene	1	1	0
(B6 x PWD)F1	32	85330	pachytene	0	0	0
(B6 x PWD)F1	33	85330	pachytene	0	0	0
(B6 x PWD)F1	34	85330	pachytene	1	1	0
(B6 x PWD)F1	35	85330	pachytene	1	0	1
(B6 x PWD)F1	36	85330	pachytene	0	0	0
(B6 x PWD)F1	37	85330	pachytene	1	1	0
(B6 x PWD)F1	38	85330	pachytene	1	0	1
(B6 x PWD)F1	39	85330	pachytene	0	0	0
(B6 x PWD)F1	40	85330	pachytene	0	0	0
(B6 x PWD)F1	41	85330	pachytene	0	0	0
(B6 x PWD)F1	42	85330	pachytene	0	0	0
(B6 x PWD)F1	43	85330	pachytene	0	0	0
(B6 x PWD)F1	44	85330	pachytene	0	0	0
(B6 x PWD)F1	45	85330	pachytene	1	0	1
(B6 x PWD)F1	46	85330	pachytene	0	0	0
(B6 x PWD)F1	47	85330	pachytene	0	0	0
(B6 x PWD)F1	48	85330	pachytene	0	0	0
(B6 x PWD)F1	49	85330	pachytene	0	0	0
(B6 x PWD)F1	50	85330	pachytene	1	1	0
(B6 x PWD)F1	51	85330	pachytene	1	1	0
(B6 x PWD)F1	52	85330	pachytene	0	0	0
(B6 x PWD)F1	53	85330	pachytene	0	0	0
(B6 x PWD)F1	54	85330	pachytene	1	1	0
(B6 x PWD)F1	55	85330	pachytene	0	0	0
(B6 x PWD)F1	56	85330	pachytene	2	2	0
(B6 x PWD)F1	57	85330	pachytene	1	1	0
(B6 x PWD)F1	58	85330	pachytene	0	0	0
(B6 x PWD)F1	59	85330	pachytene	0	0	0
(B6 x PWD)F1	60	85330	pachytene	0	0	0
(B6 x PWD)F1	61	85330	pachytene	0	0	0
(B6 x PWD)F1	62	85330	pachytene	0	0	0
(B6 x PWD)F1	1	85331	pachytene	0	0	0
(B6 x PWD)F1	2	85331	pachytene	0	0	0
(B6 x PWD)F1	3	85331	pachytene	1	0	1
(B6 x PWD)F1	4	85331	pachytene	1	1	0
(B6 x PWD)F1	5	85331	pachytene	1	1	0
(B6 x PWD)F1	6	85331	pachytene	1	1	0
(B6 x PWD)F1	7	85331	pachytene	0	0	0
(B6 x PWD)F1	8	85331	pachytene	1	1	0
(B6 x PWD)F1	9	85331	pachytene	0	0	0
(B6 x PWD)F1	10	85331	pachytene	0	0	0
(B6 x PWD)F1	11	85331	pachytene	0	0	0
(B6 x PWD)F1	12	85331	pachytene	0	0	0
(B6 x PWD)F1	13	85331	pachytene	0	0	0
(B6 x PWD)F1	14	85331	pachytene	0	0	0
(B6 x PWD)F1	15	85331	pachytene	3	1	2
(B6 x PWD)F1	16	85331	pachytene	2	2	0
(B6 x PWD)F1	17	85331	pachytene	1	1	0
(B6 x PWD)F1	18	85331	pachytene	0	0	0
(B6 x PWD)F1	19	85331	pachytene	0	0	0
(B6 x PWD)F1	20	85331	pachytene	0	0	0
(B6 x PWD)F1	21	85331	pachytene	1	1	0
(B6 x PWD)F1	22	85331	pachytene	1	0	1
(B6 x PWD)F1	23	85331	pachytene	2	2	0
(B6 x PWD)F1	24	85331	pachytene	1	1	0
(B6 x PWD)F1	25	85331	pachytene	0	0	0
(B6 x PWD)F1	26	85331	pachytene	0	0	0
(B6 x PWD)F1	27	85331	pachytene	0	0	0
(B6 x PWD)F1	28	85331	pachytene	0	0	0
(B6 x PWD)F1	29	85331	pachytene	0	0	0
(B6 x PWD)F1	30	85331	pachytene	0	0	0
(B6 x PWD)F1	31	85331	pachytene	0	0	0
(B6 x PWD)F1	32	85331	pachytene	0	0	0
(B6 x PWD)F1	33	85331	pachytene	1	1	0
(B6 x PWD)F1	34	85331	pachytene	0	0	0
(B6 x PWD)F1	35	85331	pachytene	1	1	0
(B6 x PWD)F1	36	85331	pachytene	0	0	0
(B6 x PWD)F1	37	85331	pachytene	0	0	0
(B6 x PWD)F1	38	85331	pachytene	1	1	0
(B6 x PWD)F1	39	85331	pachytene	0	0	0
(B6 x PWD)F1	40	85331	pachytene	0	0	0
(B6 x PWD)F1	41	85331	pachytene	0	0	0
(B6 x PWD)F1	42	85331	pachytene	0	0	0
(B6 x PWD)F1	43	85331	pachytene	1	1	0
(B6 x PWD)F1	44	85331	pachytene	0	0	0
(B6 x PWD)F1	45	85331	pachytene	2	2	0
(B6 x PWD)F1	46	85331	pachytene	1	1	0
(B6 x PWD)F1	47	85331	pachytene	0	0	0
(B6 x PWD)F1	48	85331	pachytene	1	1	0
(B6 x PWD)F1	49	85331	pachytene	0	0	0
(B6 x PWD)F1	50	85331	pachytene	0	0	0
(B6 x PWD)F1	51	85331	pachytene	0	0	0
(B6 x PWD)F1	52	85331	pachytene	1	1	0
(B6 x PWD)F1	53	85331	pachytene	1	1	0
(B6 x PWD)F1	1	82281	pachytene	0	0	0
(B6 x PWD)F1	2	82281	pachytene	0	0	0
(B6 x PWD)F1	3	82281	pachytene	0	0	0
(B6 x PWD)F1	4	82281	pachytene	1	1	0
(B6 x PWD)F1	5	82281	pachytene	0	0	0
(B6 x PWD)F1	6	82281	pachytene	0	0	0
(B6 x PWD)F1	7	82281	pachytene	0	0	0
(B6 x PWD)F1	8	82281	pachytene	0	0	0
(B6 x PWD)F1	9	82281	pachytene	1	0	1
(B6 x PWD)F1	10	82281	pachytene	0	0	0
(B6 x PWD)F1	11	82281	pachytene	3	2	1
(B6 x PWD)F1	12	82281	pachytene	0	0	0
(B6 x PWD)F1	13	82281	pachytene	1	1	0
(B6 x PWD)F1	14	82281	pachytene	2	2	0
(B6 x PWD)F1	15	82281	pachytene	0	0	0
(B6 x PWD)F1	16	82281	pachytene	1	1	0
(B6 x PWD)F1	17	82281	pachytene	0	0	0
(B6 x PWD)F1	18	82281	pachytene	1	1	0
(B6 x PWD)F1	19	82281	pachytene	0	0	0
(B6 x PWD)F1	20	82281	pachytene	1	1	0
(B6 x PWD)F1	21	82281	pachytene	0	0	0
(B6 x PWD)F1	22	82281	pachytene	2	2	0
(B6 x PWD)F1	23	82281	pachytene	0	0	0
(B6 x PWD)F1	24	82281	pachytene	1	1	0
(B6 x PWD)F1	25	82281	pachytene	0	0	0
(B6 x PWD)F1	26	82281	pachytene	1	1	0
(B6 x PWD)F1	27	82281	pachytene	1	1	0
(B6 x PWD)F1	28	82281	pachytene	0	0	0
(B6 x PWD)F1	29	82281	pachytene	0	0	0
(B6 x PWD)F1	30	82281	pachytene	2	2	0
(B6 x PWD)F1	31	82281	pachytene	0	0	0
(B6 x PWD)F1	32	82281	pachytene	0	0	0
(B6 x PWD)F1	33	82281	pachytene	0	0	0
(B6 x PWD)F1	34	82281	pachytene	0	0	0
(B6 x PWD)F1	35	82281	pachytene	0	0	0
(B6 x PWD)F1	36	82281	pachytene	0	0	0
(B6 x PWD)F1	37	82281	pachytene	1	1	0
(B6 x PWD)F1	38	82281	pachytene	1	1	0
(B6 x PWD)F1	39	82281	pachytene	1	1	0
(B6 x PWD)F1	40	82281	pachytene	0	0	0
(B6 x PWD)F1	41	82281	pachytene	0	0	0
(B6 x PWD)F1	1	82504	pachytene	0	0	0
(B6 x PWD)F1	2	82504	pachytene	0	0	0
(B6 x PWD)F1	3	82504	pachytene	0	0	0
(B6 x PWD)F1	4	82504	pachytene	1	1	0
(B6 x PWD)F1	5	82504	pachytene	1	1	0
(B6 x PWD)F1	6	82504	pachytene	0	0	0
(B6 x PWD)F1	7	82504	pachytene	0	0	0
(B6 x PWD)F1	8	82504	pachytene	1	1	0
(B6 x PWD)F1	9	82504	pachytene	0	0	0
(B6 x PWD)F1	10	82504	pachytene	0	0	0
(B6 x PWD)F1	11	82504	pachytene	1	0	1
(B6 x PWD)F1	12	82504	pachytene	0	0	0
(B6 x PWD)F1	13	82504	pachytene	0	0	0
(B6 x PWD)F1	14	82504	pachytene	0	0	0
(B6 x PWD)F1	15	82504	pachytene	0	0	0
(B6 x PWD)F1	16	82504	pachytene	1	0	1
(B6 x PWD)F1	17	82504	pachytene	0	0	0
(B6 x PWD)F1	18	82504	pachytene	2	2	0
(B6 x PWD)F1	19	82504	pachytene	0	0	0
(B6 x PWD)F1	20	82504	pachytene	0	0	0
(B6 x PWD)F1	21	82504	pachytene	0	0	0
(B6 x PWD)F1	22	82504	pachytene	1	0	1
(B6 x PWD)F1	23	82504	pachytene	1	0	1
(B6 x PWD)F1	24	82504	pachytene	2	1	1
(B6 x PWD)F1	25	82504	pachytene	0	0	0
(B6 x PWD)F1	26	82504	pachytene	0	0	0
(B6 x PWD)F1	27	82504	pachytene	1	1	0
(B6 x PWD)F1	28	82504	pachytene	0	0	0
(B6 x PWD)F1	29	82504	pachytene	0	0	0
(B6 x PWD)F1	30	82504	pachytene	0	0	0
(B6 x PWD)F1	31	82504	pachytene	0	0	0
(B6 x PWD)F1	32	82504	pachytene	1	1	0
(B6 x PWD)F1	33	82504	pachytene	0	0	0
(B6 x PWD)F1	34	82504	pachytene	3	2	1
(B6 x PWD)F1	35	82504	pachytene	0	0	0
(B6 x PWD)F1	36	82504	pachytene	2	1	1
(B6 x PWD)F1	37	82504	pachytene	1	1	0
(B6 x PWD)F1	38	82504	pachytene	0	0	0
(B6 x PWD)F1	39	82504	pachytene	1	0	1
(B6 x PWD)F1	40	82504	pachytene	1	1	0
(B6 x PWD)F1	41	82504	pachytene	1	1	0
(B6 x PWD)F1	42	82504	pachytene	1	1	0
(B6 x PWD)F1	43	82504	pachytene	1	1	0
(B6 x PWD)F1	44	82504	pachytene	2	0	2
(B6 x PWD)F1	45	82504	pachytene	0	0	0
(PWD x B6)F1	1	89986	pachytene	1	0	1
(PWD x B6)F1	2	89986	pachytene	2	1	1
(PWD x B6)F1	3	89986	pachytene	5	4	1
(PWD x B6)F1	4	89986	pachytene	1	0	1
(PWD x B6)F1	5	89986	pachytene	2	2	0
(PWD x B6)F1	6	89986	pachytene	4	4	0
(PWD x B6)F1	7	89986	pachytene	0	0	0
(PWD x B6)F1	8	89986	pachytene	1	0	1
(PWD x B6)F1	9	89986	pachytene	4	4	0
(PWD x B6)F1	10	89986	pachytene	3	1	2
(PWD x B6)F1	11	89986	pachytene	0	0	0
(PWD x B6)F1	12	89986	pachytene	4	3	1
(PWD x B6)F1	13	89986	pachytene	0	0	0
(PWD x B6)F1	14	89986	pachytene	2	0	2
(PWD x B6)F1	15	89986	pachytene	3	1	2
(PWD x B6)F1	16	89986	pachytene	4	2	2
(PWD x B6)F1	17	89986	pachytene	1	1	0
(PWD x B6)F1	18	89986	pachytene	4	2	2
(PWD x B6)F1	19	89986	pachytene	2	1	1
(PWD x B6)F1	20	89986	pachytene	0	0	0
(PWD x B6)F1	21	89986	pachytene	1	1	0
(PWD x B6)F1	22	89986	pachytene	1	1	0
(PWD x B6)F1	23	89986	pachytene	1	1	0
(PWD x B6)F1	24	89986	pachytene	3	3	0
(PWD x B6)F1	25	89986	pachytene	2	2	0
(PWD x B6)F1	26	89986	pachytene	2	2	0
(PWD x B6)F1	27	89986	pachytene	4	1	3
(PWD x B6)F1	28	89986	pachytene	4	2	2
(PWD x B6)F1	29	89986	pachytene	1	0	1
(PWD x B6)F1	30	89986	pachytene	2	0	2
(PWD x B6)F1	31	89986	pachytene	1	1	0
(PWD x B6)F1	32	89986	pachytene	1	1	0
(PWD x B6)F1	33	89986	pachytene	1	1	0
(PWD x B6)F1	34	89986	pachytene	1	1	0
(PWD x B6)F1	35	89986	pachytene	0	0	0
(PWD x B6)F1	36	89986	pachytene	3	3	0
(PWD x B6)F1	37	89986	pachytene	6	2	4
(PWD x B6)F1	38	89986	pachytene	3	2	1
(PWD x B6)F1	39	89986	pachytene	0	0	0
(PWD x B6)F1	40	89986	pachytene	0	0	0
(PWD x B6)F1	41	89986	pachytene	3	1	2
(PWD x B6)F1	42	89986	pachytene	0	0	0
(PWD x B6)F1	43	89986	pachytene	2	1	1
(PWD x B6)F1	44	89986	pachytene	3	1	2
(PWD x B6)F1	45	89986	pachytene	1	0	1
(PWD x B6)F1	46	89986	pachytene	2	1	1
(PWD x B6)F1	47	89986	pachytene	5	4	1
(PWD x B6)F1	48	89986	pachytene	2	2	0
(PWD x B6)F1	49	89986	pachytene	1	1	0
(PWD x B6)F1	50	89986	pachytene	4	4	0
(PWD x B6)F1	51	89986	pachytene	2	2	0
(PWD x B6)F1	52	89986	pachytene	1	1	0
(PWD x B6)F1	53	89986	pachytene	3	2	1
(PWD x B6)F1	54	89986	pachytene	3	3	0
(PWD x B6)F1	55	89986	pachytene	3	3	0
(PWD x B6)F1	56	89986	pachytene	2	1	1
(PWD x B6)F1	57	89986	pachytene	3	2	1
(PWD x B6)F1	58	89986	pachytene	2	2	0
(PWD x B6)F1	59	89986	pachytene	1	1	0
(PWD x B6)F1	60	89986	pachytene	3	3	0
(PWD x B6)F1	61	89986	pachytene	2	2	0
(PWD x B6)F1	62	89986	pachytene	3	3	0
(PWD x B6)F1	63	89986	pachytene	2	2	0
(PWD x B6)F1	64	89986	pachytene	0	0	0
(PWD x B6)F1	65	89986	pachytene	3	2	1
(PWD x B6)F1	1	89987	pachytene	1	0	1
(PWD x B6)F1	2	89987	pachytene	1	0	1
(PWD x B6)F1	3	89987	pachytene	3	3	0
(PWD x B6)F1	4	89987	pachytene	0	0	0
(PWD x B6)F1	5	89987	pachytene	1	0	1
(PWD x B6)F1	6	89987	pachytene	3	0	2
(PWD x B6)F1	7	89987	pachytene	2	2	0
(PWD x B6)F1	8	89987	pachytene	1	1	0
(PWD x B6)F1	9	89987	pachytene	0	0	0
(PWD x B6)F1	10	89987	pachytene	3	1	2
(PWD x B6)F1	11	89987	pachytene	4	1	3
(PWD x B6)F1	12	89987	pachytene	1	1	0
(PWD x B6)F1	13	89987	pachytene	1	1	0
(PWD x B6)F1	14	89987	pachytene	1	1	0
(PWD x B6)F1	15	89987	pachytene	0	0	0
(PWD x B6)F1	16	89987	pachytene	3	3	0
(PWD x B6)F1	17	89987	pachytene	1	1	0
(PWD x B6)F1	18	89987	pachytene	3	2	1
(PWD x B6)F1	19	89987	pachytene	0	0	0
(PWD x B6)F1	20	89987	pachytene	1	1	0
(PWD x B6)F1	21	89987	pachytene	4	2	2
(PWD x B6)F1	22	89987	pachytene	3	3	0
(PWD x B6)F1	23	89987	pachytene	2	2	0
(PWD x B6)F1	24	89987	pachytene	2	1	1
(PWD x B6)F1	25	89987	pachytene	3	2	1
(PWD x B6)F1	26	89987	pachytene	1	1	0
(PWD x B6)F1	27	89987	pachytene	4	4	0
(PWD x B6)F1	28	89987	pachytene	1	1	0
(PWD x B6)F1	29	89987	pachytene	1	0	1
(PWD x B6)F1	30	89987	pachytene	1	1	0
(PWD x B6)F1	31	89987	pachytene	4	1	3
(PWD x B6)F1	32	89987	pachytene	3	3	0
(PWD x B6)F1	33	89987	pachytene	2	2	0
(PWD x B6)F1	34	89987	pachytene	3	2	1
(PWD x B6)F1	35	89987	pachytene	1	1	0
(PWD x B6)F1	36	89987	pachytene	1	1	0
(PWD x B6)F1	37	89987	pachytene	2	1	1
(PWD x B6)F1	38	89987	pachytene	0	0	0
(PWD x B6)F1	39	89987	pachytene	0	0	0
(PWD x B6)F1	40	89987	pachytene	1	0	1
(PWD x B6)F1	41	89987	pachytene	0	0	0
(PWD x B6)F1	42	89987	pachytene	3	2	1
(PWD x B6)F1	43	89987	pachytene	4	3	1
(PWD x B6)F1	44	89987	pachytene	3	1	2
(PWD x B6)F1	45	89987	pachytene	2	1	1
(PWD x B6)F1	46	89987	pachytene	2	2	0
(PWD x B6)F1	47	89987	pachytene	1	1	0
(PWD x B6)F1	48	89987	pachytene	1	1	0
(PWD x B6)F1	49	89987	pachytene	1	1	0
(PWD x B6)F1	50	89987	pachytene	2	0	2
(PWD x B6)F1	51	89987	pachytene	2	1	1
(PWD x B6)F1	52	89987	pachytene	3	2	1
(PWD x B6)F1	53	89987	pachytene	4	2	2
(PWD x B6)F1	54	89987	pachytene	1	1	0
(PWD x B6)F1	55	89987	pachytene	1	1	0
(PWD x B6)F1	56	89987	pachytene	5	3	2
(PWD x B6)F1	57	89987	pachytene	4	3	1
(PWD x B6)F1	58	89987	pachytene	4	4	0
(PWD x B6)F1	59	89987	pachytene	0	0	0
(PWD x B6)F1	60	89987	pachytene	0	0	0
(PWD x B6)F1	61	89987	pachytene	6	5	1
(PWD x B6)F1	62	89987	pachytene	0	0	0
(PWD x B6)F1	63	89987	pachytene	1	0	1
(PWD x B6)F1	64	89987	pachytene	2	2	0
(PWD x B6)F1	65	89987	pachytene	1	0	1
(PWD x B6)F1	66	89987	pachytene	2	1	1
(PWD x B6)F1	67	89987	pachytene	6	3	3
(PWD x B6)F1	1	89988	pachytene	6	5	1
(PWD x B6)F1	2	89988	pachytene	0	0	0
(PWD x B6)F1	3	89988	pachytene	1	1	0
(PWD x B6)F1	4	89988	pachytene	1	1	0
(PWD x B6)F1	5	89988	pachytene	1	1	0
(PWD x B6)F1	6	89988	pachytene	1	1	0
(PWD x B6)F1	7	89988	pachytene	2	1	1
(PWD x B6)F1	8	89988	pachytene	3	1	2
(PWD x B6)F1	9	89988	pachytene	1	0	1
(PWD x B6)F1	10	89988	pachytene	2	1	1
(PWD x B6)F1	11	89988	pachytene	2	1	1
(PWD x B6)F1	12	89988	pachytene	5	3	2
(PWD x B6)F1	13	89988	pachytene	0	0	0
(PWD x B6)F1	14	89988	pachytene	1	0	1
(PWD x B6)F1	15	89988	pachytene	2	1	1
(PWD x B6)F1	16	89988	pachytene	6	2	4
(PWD x B6)F1	17	89988	pachytene	0	0	0
(PWD x B6)F1	18	89988	pachytene	3	3	0
(PWD x B6)F1	19	89988	pachytene	5	2	3
(PWD x B6)F1	20	89988	pachytene	3	2	1
(PWD x B6)F1	21	89988	pachytene	2	0	2
(PWD x B6)F1	22	89988	pachytene	4	2	2
(PWD x B6)F1	23	89988	pachytene	4	4	0
(PWD x B6)F1	24	89988	pachytene	0	0	0
(PWD x B6)F1	25	89988	pachytene	2	0	2
(PWD x B6)F1	26	89988	pachytene	0	0	0
(PWD x B6)F1	27	89988	pachytene	0	0	0
(PWD x B6)F1	28	89988	pachytene	5	3	2
(PWD x B6)F1	29	89988	pachytene	1	1	0
(PWD x B6)F1	30	89988	pachytene	1	0	1
(PWD x B6)F1	31	89988	pachytene	2	1	1
(PWD x B6)F1	32	89988	pachytene	3	2	1
(PWD x B6)F1	33	89988	pachytene	1	0	1
(PWD x B6)F1	34	89988	pachytene	4	4	0
(PWD x B6)F1	35	89988	pachytene	3	3	0
(PWD x B6)F1	36	89988	pachytene	1	1	0
(PWD x B6)F1	37	89988	pachytene	1	1	0
(PWD x B6)F1	38	89988	pachytene	3	2	1
(PWD x B6)F1	39	89988	pachytene	2	1	1
(PWD x B6)F1	40	89988	pachytene	3	2	1
(PWD x B6)F1	41	89988	pachytene	4	4	0
(PWD x B6)F1	42	89988	pachytene	3	2	1
(PWD x B6)F1	43	89988	pachytene	2	2	0
(PWD x B6)F1	44	89988	pachytene	1	1	0
(PWD x B6)F1	45	89988	pachytene	1	1	0
(PWD x B6)F1	46	89988	pachytene	5	5	0
(PWD x B6)F1	47	89988	pachytene	0	0	0
(PWD x B6)F1	48	89988	pachytene	0	0	0
(PWD x B6)F1	49	89988	pachytene	0	0	0
(PWD x B6)F1	50	89988	pachytene	2	2	0
(PWD x B6)F1	51	89988	pachytene	3	3	0
(PWD x B6)F1	52	89988	pachytene	3	3	0
(PWD x B6)F1	53	89988	pachytene	1	1	0
(PWD x B6)F1	54	89988	pachytene	5	3	2
(PWD x B6)F1	55	89988	pachytene	2	2	0
(PWD x B6)F1	56	89988	pachytene	4	4	0
(PWD x B6)F1	57	89988	pachytene	0	0	0
(PWD x B6)F1	58	89988	pachytene	2	2	0
(PWD x B6)F1	59	89988	pachytene	3	3	0
(PWD x B6)F1	60	89988	pachytene	1	1	0
(PWD x B6)F1	61	89988	pachytene	3	2	1
(PWD x B6)F1	62	89988	pachytene	0	0	0
(PWD x B6)F1	63	89988	pachytene	1	1	0
(PWD x B6)F1	64	89988	pachytene	3	3	0
(PWD x B6)F1	65	89988	pachytene	2	2	0
(PWD x B6)F1	1	94950	pachytene	6	5	1
(PWD x B6)F1	2	94950	pachytene	0	0	0
(PWD x B6)F1	3	94950	pachytene	2	0	2
(PWD x B6)F1	4	94950	pachytene	1	1	0
(PWD x B6)F1	5	94950	pachytene	1	1	0
(PWD x B6)F1	6	94950	pachytene	2	1	1
(PWD x B6)F1	7	94950	pachytene	3	2	1
(PWD x B6)F1	8	94950	pachytene	4	2	2
(PWD x B6)F1	9	94950	pachytene	1	0	1
(PWD x B6)F1	10	94950	pachytene	4	2	2
(PWD x B6)F1	11	94950	pachytene	0	0	0
(PWD x B6)F1	12	94950	pachytene	3	2	1
(PWD x B6)F1	13	94950	pachytene	1	0	1
(PWD x B6)F1	14	94950	pachytene	3	3	0
(PWD x B6)F1	15	94950	pachytene	0	0	0
(PWD x B6)F1	16	94950	pachytene	1	1	0
(PWD x B6)F1	17	94950	pachytene	6	4	2
(PWD x B6)F1	18	94950	pachytene	3	2	1
(PWD x B6)F1	19	94950	pachytene	4	4	0
(PWD x B6)F1	20	94950	pachytene	5	4	1
(PWD x B6)F1	21	94950	pachytene	0	0	0
(PWD x B6)F1	22	94950	pachytene	0	0	0
(PWD x B6)F1	23	94950	pachytene	4	4	0
(PWD x B6)F1	24	94950	pachytene	0	0	0
(PWD x B6)F1	25	94950	pachytene	2	2	0
(PWD x B6)F1	26	94950	pachytene	3	1	2
(PWD x B6)F1	27	94950	pachytene	2	2	0
(PWD x B6)F1	28	94950	pachytene	4	2	2
(PWD x B6)F1	29	94950	pachytene	1	1	0
(PWD x B6)F1	30	94950	pachytene	0	0	0
(PWD x B6)F1	31	94950	pachytene	2	2	0
(PWD x B6)F1	32	94950	pachytene	2	0	2
(PWD x B6)F1	33	94950	pachytene	2	1	1
(PWD x B6)F1	34	94950	pachytene	2	2	0
(PWD x B6)F1	35	94950	pachytene	4	4	0
(PWD x B6)F1	36	94950	pachytene	0	0	0
(PWD x B6)F1	37	94950	pachytene	3	1	2
(PWD x B6)F1	38	94950	pachytene	5	4	1
(PWD x B6)F1	39	94950	pachytene	1	1	0
(PWD x B6)F1	40	94950	pachytene	1	1	0
(PWD x B6)F1	41	94950	pachytene	4	2	2
(PWD x B6)F1	42	94950	pachytene	2	2	0
(PWD x B6)F1	43	94950	pachytene	3	3	0
(PWD x B6)F1	44	94950	pachytene	1	1	0
(PWD x B6)F1	45	94950	pachytene	3	2	1
(PWD x B6)F1	46	94950	pachytene	0	0	0
(PWD x B6)F1	47	94950	pachytene	1	1	0
(PWD x B6)F1	48	94950	pachytene	1	1	0
(PWD x B6)F1	49	94950	pachytene	1	0	1
(PWD x B6)F1	50	94950	pachytene	2	2	0
(PWD x B6)F1	51	94950	pachytene	1	0	1
(PWD x B6)F1	52	94950	pachytene	2	2	0
(PWD x B6)F1	53	94950	pachytene	3	3	0
(PWD x B6)F1	54	94950	pachytene	2	2	0
(PWD x B6)F1	55	94950	pachytene	1	1	0
(PWD x B6)F1	56	94950	pachytene	3	3	0
(PWD x B6)F1	57	94950	pachytene	5	4	1
(PWD x B6)F1	58	94950	pachytene	3	2	1
(PWD x B6)F1	59	94950	pachytene	5	3	2
(PWD x B6)F1	60	94950	pachytene	1	0	1
(PWD x B6)F1	61	94950	pachytene	2	2	0
(PWD x B6)F1	62	94950	pachytene	2	2	0
(PWD x B6)F1	63	94950	pachytene	2	1	1
(PWD x B6)F1	64	94950	pachytene	7	4	3
(PWD x B6)F1	1	94951	pachytene	1	0	1
(PWD x B6)F1	2	94951	pachytene	3	3	0
(PWD x B6)F1	3	94951	pachytene	3	2	1
(PWD x B6)F1	4	94951	pachytene	1	1	0
(PWD x B6)F1	5	94951	pachytene	3	3	0
(PWD x B6)F1	6	94951	pachytene	3	2	1
(PWD x B6)F1	7	94951	pachytene	0	0	0
(PWD x B6)F1	8	94951	pachytene	0	0	0
(PWD x B6)F1	9	94951	pachytene	3	2	1
(PWD x B6)F1	10	94951	pachytene	3	2	1
(PWD x B6)F1	11	94951	pachytene	1	0	1
(PWD x B6)F1	12	94951	pachytene	4	2	2
(PWD x B6)F1	13	94951	pachytene	1	1	0
(PWD x B6)F1	14	94951	pachytene	0	0	0
(PWD x B6)F1	15	94951	pachytene	1	0	1
(PWD x B6)F1	16	94951	pachytene	0	0	0
(PWD x B6)F1	17	94951	pachytene	5	3	2
(PWD x B6)F1	18	94951	pachytene	0	0	0
(PWD x B6)F1	19	94951	pachytene	2	2	0
(PWD x B6)F1	20	94951	pachytene	6	4	2
(PWD x B6)F1	21	94951	pachytene	3	2	1
(PWD x B6)F1	22	94951	pachytene	3	2	1
(PWD x B6)F1	23	94951	pachytene	1	0	1
(PWD x B6)F1	24	94951	pachytene	0	0	0
(PWD x B6)F1	25	94951	pachytene	1	1	0
(PWD x B6)F1	26	94951	pachytene	0	0	0
(PWD x B6)F1	27	94951	pachytene	2	2	0
(PWD x B6)F1	28	94951	pachytene	1	1	0
(PWD x B6)F1	29	94951	pachytene	1	1	0
(PWD x B6)F1	30	94951	pachytene	4	4	0
(PWD x B6)F1	31	94951	pachytene	4	4	0
(PWD x B6)F1	32	94951	pachytene	3	2	1
(PWD x B6)F1	33	94951	pachytene	1	1	0
(PWD x B6)F1	34	94951	pachytene	2	2	0
(PWD x B6)F1	35	94951	pachytene	2	2	0
(PWD x B6)F1	36	94951	pachytene	3	2	1
(PWD x B6)F1	37	94951	pachytene	1	1	0
(PWD x B6)F1	38	94951	pachytene	4	1	3
(PWD x B6)F1	39	94951	pachytene	0	0	0
(PWD x B6)F1	40	94951	pachytene	1	1	0
(PWD x B6)F1	41	94951	pachytene	4	3	1
(PWD x B6)F1	42	94951	pachytene	5	3	2
(PWD x B6)F1	43	94951	pachytene	2	1	1
(PWD x B6)F1	44	94951	pachytene	2	2	0
(PWD x B6)F1	45	94951	pachytene	3	3	0
(PWD x B6)F1	46	94951	pachytene	3	3	0
(PWD x B6)F1	47	94951	pachytene	2	2	0
(PWD x B6)F1	48	94951	pachytene	4	4	0
(PWD x B6)F1	49	94951	pachytene	2	2	0
(PWD x B6)F1	50	94951	pachytene	4	3	1
(PWD x B6)F1	51	94951	pachytene	2	2	0
(PWD x B6)F1	52	94951	pachytene	2	2	0
(PWD x B6)F1	53	94951	pachytene	5	4	1
(PWD x B6)F1	54	94951	pachytene	1	1	0
(PWD x B6)F1	55	94951	pachytene	3	2	1
(PWD x B6)F1	56	94951	pachytene	0	0	0
(PWD x B6)F1	57	94951	pachytene	1	1	0
(PWD x B6)F1	58	94951	pachytene	6	3	3
(PWD x B6)F1	59	94951	pachytene	2	1	1
(PWD x B6)F1	60	94951	pachytene	1	1	0
(PWD x B6)F1	61	94951	pachytene	3	2	1
(PWD x B6)F1	62	94951	pachytene	3	1	2
(PWD x B6)F1	63	94951	pachytene	4	4	0
(PWD x B6)F1	64	94951	pachytene	3	2	1
(PWD x B6)F1	65	94951	pachytene	1	1	0
(DX1s x PWD)F1	1	84239	pachytene	0	0	0
(DX1s x PWD)F1	2	84239	pachytene	2	2	0
(DX1s x PWD)F1	3	84239	pachytene	1	0	1
(DX1s x PWD)F1	4	84239	pachytene	2	2	0
(DX1s x PWD)F1	5	84239	pachytene	0	0	0
(DX1s x PWD)F1	6	84239	pachytene	2	2	0
(DX1s x PWD)F1	7	84239	pachytene	1	1	0
(DX1s x PWD)F1	8	84239	pachytene	2	1	1
(DX1s x PWD)F1	9	84239	pachytene	0	0	0
(DX1s x PWD)F1	10	84239	pachytene	1	1	0
(DX1s x PWD)F1	11	84239	pachytene	1	1	0
(DX1s x PWD)F1	12	84239	pachytene	1	0	1
(DX1s x PWD)F1	13	84239	pachytene	1	1	0
(DX1s x PWD)F1	14	84239	pachytene	1	1	0
(DX1s x PWD)F1	15	84239	pachytene	1	1	0
(DX1s x PWD)F1	16	84239	pachytene	0	0	0
(DX1s x PWD)F1	17	84239	pachytene	0	0	0
(DX1s x PWD)F1	18	84239	pachytene	0	0	0
(DX1s x PWD)F1	19	84239	pachytene	2	2	0
(DX1s x PWD)F1	20	84239	pachytene	0	0	0
(DX1s x PWD)F1	21	84239	pachytene	1	1	0
(DX1s x PWD)F1	22	84239	pachytene	2	2	0
(DX1s x PWD)F1	23	84239	pachytene	2	1	1
(DX1s x PWD)F1	24	84239	pachytene	4	3	1
(DX1s x PWD)F1	25	84239	pachytene	2	2	0
(DX1s x PWD)F1	26	84239	pachytene	2	1	1
(DX1s x PWD)F1	27	84239	pachytene	1	1	0
(DX1s x PWD)F1	28	84239	pachytene	2	2	0
(DX1s x PWD)F1	29	84239	pachytene	0	0	0
(DX1s x PWD)F1	30	84239	pachytene	3	1	2
(DX1s x PWD)F1	31	84239	pachytene	1	1	0
(DX1s x PWD)F1	32	84239	pachytene	1	1	0
(DX1s x PWD)F1	33	84239	pachytene	0	0	0
(DX1s x PWD)F1	34	84239	pachytene	1	1	0
(DX1s x PWD)F1	35	84239	pachytene	3	1	2
(DX1s x PWD)F1	36	84239	pachytene	1	1	0
(DX1s x PWD)F1	37	84239	pachytene	1	1	0
(DX1s x PWD)F1	38	84239	pachytene	0	0	0
(DX1s x PWD)F1	39	84239	pachytene	0	0	0
(DX1s x PWD)F1	40	84239	pachytene	1	1	0
(DX1s x PWD)F1	41	84239	pachytene	1	1	0
(DX1s x PWD)F1	42	84239	pachytene	5	4	1
(DX1s x PWD)F1	43	84239	pachytene	2	2	0
(DX1s x PWD)F1	44	84239	pachytene	2	2	0
(DX1s x PWD)F1	45	84239	pachytene	3	2	1
(DX1s x PWD)F1	46	84239	pachytene	2	2	0
(DX1s x PWD)F1	47	84239	pachytene	2	1	1
(DX1s x PWD)F1	48	84239	pachytene	1	1	0
(DX1s x PWD)F1	49	84239	pachytene	1	1	0
(DX1s x PWD)F1	50	84239	pachytene	2	2	0
(DX1s x PWD)F1	51	84239	pachytene	0	0	0
(DX1s x PWD)F1	52	84239	pachytene	2	2	0
(DX1s x PWD)F1	53	84239	pachytene	1	1	0
(DX1s x PWD)F1	54	84239	pachytene	2	2	0
(DX1s x PWD)F1	55	84239	pachytene	1	1	0
(DX1s x PWD)F1	56	84239	pachytene	1	1	0
(DX1s x PWD)F1	57	84239	pachytene	2	2	0
(DX1s x PWD)F1	58	84239	pachytene	1	0	1
(DX1s x PWD)F1	59	84239	pachytene	2	2	0
(DX1s x PWD)F1	60	84239	pachytene	0	0	0
(DX1s x PWD)F1	61	84239	pachytene	1	1	0
(DX1s x PWD)F1	62	84239	pachytene	0	0	0
(DX1s x PWD)F1	63	84239	pachytene	2	2	0
(DX1s x PWD)F1	64	84239	pachytene	1	1	0
(DX1s x PWD)F1	65	84239	pachytene	1	0	1
(DX1s x PWD)F1	66	84239	pachytene	2	0	2
(DX1s x PWD)F1	67	84239	pachytene	1	0	1
(DX1s x PWD)F1	68	84239	pachytene	0	0	0
(DX1s x PWD)F1	69	84239	pachytene	2	1	1
(DX1s x PWD)F1	70	84239	pachytene	0	0	0
(DX1s x PWD)F1	1	84240	pachytene	1	1	0
(DX1s x PWD)F1	2	84240	pachytene	2	2	0
(DX1s x PWD)F1	3	84240	pachytene	1	1	0
(DX1s x PWD)F1	4	84240	pachytene	1	1	0
(DX1s x PWD)F1	5	84240	pachytene	3	2	1
(DX1s x PWD)F1	6	84240	pachytene	0	0	0
(DX1s x PWD)F1	7	84240	pachytene	1	1	0
(DX1s x PWD)F1	8	84240	pachytene	3	3	0
(DX1s x PWD)F1	9	84240	pachytene	3	2	1
(DX1s x PWD)F1	10	84240	pachytene	1	0	1
(DX1s x PWD)F1	11	84240	pachytene	2	1	1
(DX1s x PWD)F1	12	84240	pachytene	1	1	0
(DX1s x PWD)F1	13	84240	pachytene	1	0	1
(DX1s x PWD)F1	14	84240	pachytene	2	2	0
(DX1s x PWD)F1	15	84240	pachytene	2	2	0
(DX1s x PWD)F1	16	84240	pachytene	0	0	0
(DX1s x PWD)F1	17	84240	pachytene	3	2	1
(DX1s x PWD)F1	18	84240	pachytene	4	4	0
(DX1s x PWD)F1	19	84240	pachytene	1	1	0
(DX1s x PWD)F1	20	84240	pachytene	0	0	0
(DX1s x PWD)F1	21	84240	pachytene	0	0	0
(DX1s x PWD)F1	22	84240	pachytene	3	3	0
(DX1s x PWD)F1	23	84240	pachytene	2	1	1
(DX1s x PWD)F1	24	84240	pachytene	2	2	0
(DX1s x PWD)F1	25	84240	pachytene	1	1	0
(DX1s x PWD)F1	26	84240	pachytene	0	0	0
(DX1s x PWD)F1	27	84240	pachytene	2	2	0
(DX1s x PWD)F1	28	84240	pachytene	2	0	2
(DX1s x PWD)F1	29	84240	pachytene	1	1	0
(DX1s x PWD)F1	30	84240	pachytene	2	0	2
(DX1s x PWD)F1	31	84240	pachytene	0	0	0
(DX1s x PWD)F1	32	84240	pachytene	5	3	2
(DX1s x PWD)F1	33	84240	pachytene	1	1	0
(DX1s x PWD)F1	34	84240	pachytene	4	4	0
(DX1s x PWD)F1	35	84240	pachytene	1	1	0
(DX1s x PWD)F1	36	84240	pachytene	5	4	1
(DX1s x PWD)F1	37	84240	pachytene	1	0	1
(DX1s x PWD)F1	38	84240	pachytene	2	2	0
(DX1s x PWD)F1	39	84240	pachytene	1	0	1
(DX1s x PWD)F1	40	84240	pachytene	2	2	0
(DX1s x PWD)F1	41	84240	pachytene	9	7	2
(DX1s x PWD)F1	42	84240	pachytene	0	0	0
(DX1s x PWD)F1	43	84240	pachytene	2	2	0
(DX1s x PWD)F1	44	84240	pachytene	6	4	2
(DX1s x PWD)F1	45	84240	pachytene	2	1	1
(DX1s x PWD)F1	46	84240	pachytene	0	0	0
(DX1s x PWD)F1	47	84240	pachytene	2	2	0
(DX1s x PWD)F1	48	84240	pachytene	1	1	0
(DX1s x PWD)F1	49	84240	pachytene	3	1	2
(DX1s x PWD)F1	50	84240	pachytene	2	0	2
(DX1s x PWD)F1	51	84240	pachytene	0	0	0
(DX1s x PWD)F1	52	84240	pachytene	0	0	0
(DX1s x PWD)F1	53	84240	pachytene	3	3	0
(DX1s x PWD)F1	54	84240	pachytene	0	0	0
(DX1s x PWD)F1	55	84240	pachytene	3	3	0
(DX1s x PWD)F1	56	84240	pachytene	2	2	0
(DX1s x PWD)F1	57	84240	pachytene	3	2	1
(DX1s x PWD)F1	58	84240	pachytene	2	2	0
(DX1s x PWD)F1	59	84240	pachytene	0	0	0
(DX1s x PWD)F1	1	84241	pachytene	1	1	0
(DX1s x PWD)F1	2	84241	pachytene	1	1	0
(DX1s x PWD)F1	3	84241	pachytene	0	0	0
(DX1s x PWD)F1	4	84241	pachytene	0	0	0
(DX1s x PWD)F1	5	84241	pachytene	2	1	1
(DX1s x PWD)F1	6	84241	pachytene	3	2	1
(DX1s x PWD)F1	7	84241	pachytene	1	1	0
(DX1s x PWD)F1	8	84241	pachytene	2	1	1
(DX1s x PWD)F1	9	84241	pachytene	2	1	1
(DX1s x PWD)F1	10	84241	pachytene	1	1	0
(DX1s x PWD)F1	11	84241	pachytene	1	1	0
(DX1s x PWD)F1	12	84241	pachytene	1	1	0
(DX1s x PWD)F1	13	84241	pachytene	0	0	0
(DX1s x PWD)F1	14	84241	pachytene	4	4	0
(DX1s x PWD)F1	15	84241	pachytene	3	2	1
(DX1s x PWD)F1	16	84241	pachytene	3	3	0
(DX1s x PWD)F1	17	84241	pachytene	3	3	0
(DX1s x PWD)F1	18	84241	pachytene	4	4	0
(DX1s x PWD)F1	19	84241	pachytene	0	0	0
(DX1s x PWD)F1	20	84241	pachytene	2	2	0
(DX1s x PWD)F1	21	84241	pachytene	5	3	2
(DX1s x PWD)F1	22	84241	pachytene	1	0	1
(DX1s x PWD)F1	23	84241	pachytene	1	0	1
(DX1s x PWD)F1	24	84241	pachytene	2	0	2
(DX1s x PWD)F1	25	84241	pachytene	1	0	1
(DX1s x PWD)F1	26	84241	pachytene	1	1	0
(DX1s x PWD)F1	27	84241	pachytene	0	0	0
(DX1s x PWD)F1	28	84241	pachytene	0	0	0
(DX1s x PWD)F1	29	84241	pachytene	2	1	1
(DX1s x PWD)F1	30	84241	pachytene	0	0	0
(DX1s x PWD)F1	31	84241	pachytene	1	1	0
(DX1s x PWD)F1	32	84241	pachytene	1	1	0
(DX1s x PWD)F1	33	84241	pachytene	1	1	0
(DX1s x PWD)F1	34	84241	pachytene	1	0	1
(DX1s x PWD)F1	35	84241	pachytene	2	1	1
(DX1s x PWD)F1	36	84241	pachytene	8	6	2
(DX1s x PWD)F1	37	84241	pachytene	2	1	1
(DX1s x PWD)F1	38	84241	pachytene	0	0	0
(DX1s x PWD)F1	39	84241	pachytene	1	1	0
(DX1s x PWD)F1	40	84241	pachytene	4	4	0
(DX1s x PWD)F1	41	84241	pachytene	4	4	0
(DX1s x PWD)F1	42	84241	pachytene	2	2	0
(DX1s x PWD)F1	43	84241	pachytene	4	3	1
(DX1s x PWD)F1	44	84241	pachytene	4	3	1
(DX1s x PWD)F1	45	84241	pachytene	3	0	3
(DX1s x PWD)F1	46	84241	pachytene	1	1	0
(DX1s x PWD)F1	47	84241	pachytene	5	4	1
(DX1s x PWD)F1	48	84241	pachytene	1	1	0
(DX1s x PWD)F1	49	84241	pachytene	2	2	0
(DX1s x PWD)F1	50	84241	pachytene	3	3	0
(DX1s x PWD)F1	51	84241	pachytene	0	0	0
(DX1s x PWD)F1	52	84241	pachytene	1	1	0
(DX1s x PWD)F1	53	84241	pachytene	3	3	0
(DX1s x PWD)F1	54	84241	pachytene	0	0	0
(DX1s x PWD)F1	55	84241	pachytene	0	0	0
(DX1s x PWD)F1	56	84241	pachytene	2	2	0
(DX1s x PWD)F1	57	84241	pachytene	2	2	0
(DX1s x PWD)F1	58	84241	pachytene	1	1	0
(DX1s x PWD)F1	59	84241	pachytene	2	1	1
(DX1s x PWD)F1	60	84241	pachytene	1	0	1
(DX1s x PWD)F1	61	84241	pachytene	0	0	0
(DX1s x PWD)F1	62	84241	pachytene	0	0	0
(DX1s x PWD)F1	63	84241	pachytene	1	1	0
(DX1s x PWD)F1	64	84241	pachytene	1	0	1
(DX1s x PWD)F1	65	84241	pachytene	0	0	0
(DX1s x PWD)F1	66	84241	pachytene	2	2	0
(DX1s x PWD)F1	67	84241	pachytene	1	1	0
(DX1s x PWD)F1	1	84295	pachytene	1	1	0
(DX1s x PWD)F1	2	84295	pachytene	0	0	0
(DX1s x PWD)F1	3	84295	pachytene	0	0	0
(DX1s x PWD)F1	4	84295	pachytene	3	3	0
(DX1s x PWD)F1	5	84295	pachytene	2	1	1
(DX1s x PWD)F1	6	84295	pachytene	3	3	0
(DX1s x PWD)F1	7	84295	pachytene	0	0	0
(DX1s x PWD)F1	8	84295	pachytene	1	1	0
(DX1s x PWD)F1	9	84295	pachytene	1	1	0
(DX1s x PWD)F1	10	84295	pachytene	3	2	1
(DX1s x PWD)F1	11	84295	pachytene	2	2	0
(DX1s x PWD)F1	12	84295	pachytene	2	2	0
(DX1s x PWD)F1	13	84295	pachytene	2	2	0
(DX1s x PWD)F1	14	84295	pachytene	1	1	0
(DX1s x PWD)F1	15	84295	pachytene	0	0	0
(DX1s x PWD)F1	16	84295	pachytene	0	0	0
(DX1s x PWD)F1	17	84295	pachytene	4	4	0
(DX1s x PWD)F1	18	84295	pachytene	2	2	0
(DX1s x PWD)F1	19	84295	pachytene	2	2	0
(DX1s x PWD)F1	20	84295	pachytene	3	1	2
(DX1s x PWD)F1	21	84295	pachytene	0	0	0
(DX1s x PWD)F1	22	84295	pachytene	4	4	0
(DX1s x PWD)F1	23	84295	pachytene	3	3	0
(DX1s x PWD)F1	24	84295	pachytene	3	3	0
(DX1s x PWD)F1	25	84295	pachytene	1	0	1
(DX1s x PWD)F1	26	84295	pachytene	0	0	0
(DX1s x PWD)F1	27	84295	pachytene	1	1	0
(DX1s x PWD)F1	28	84295	pachytene	1	0	1
(DX1s x PWD)F1	29	84295	pachytene	2	2	0
(DX1s x PWD)F1	30	84295	pachytene	0	0	0
(DX1s x PWD)F1	31	84295	pachytene	0	0	0
(DX1s x PWD)F1	32	84295	pachytene	2	2	0
(DX1s x PWD)F1	33	84295	pachytene	2	2	0
(DX1s x PWD)F1	34	84295	pachytene	1	1	0
(DX1s x PWD)F1	35	84295	pachytene	1	1	0
(DX1s x PWD)F1	36	84295	pachytene	1	1	0
(DX1s x PWD)F1	37	84295	pachytene	2	2	0
(DX1s x PWD)F1	38	84295	pachytene	4	2	2
(DX1s x PWD)F1	39	84295	pachytene	1	1	0
(DX1s x PWD)F1	40	84295	pachytene	3	2	1
(DX1s x PWD)F1	41	84295	pachytene	1	1	0
(DX1s x PWD)F1	42	84295	pachytene	2	2	0
(DX1s x PWD)F1	43	84295	pachytene	1	1	0
(DX1s x PWD)F1	44	84295	pachytene	1	1	0
(DX1s x PWD)F1	45	84295	pachytene	5	5	0
(DX1s x PWD)F1	46	84295	pachytene	3	2	1
(DX1s x PWD)F1	47	84295	pachytene	5	5	0
(DX1s x PWD)F1	48	84295	pachytene	2	1	1
(DX1s x PWD)F1	49	84295	pachytene	1	1	0
(DX1s x PWD)F1	50	84295	pachytene	2	2	0
(DX1s x PWD)F1	51	84295	pachytene	1	1	0
(DX1s x PWD)F1	52	84295	pachytene	1	1	0
(DX1s x PWD)F1	53	84295	pachytene	1	1	0
(DX1s x PWD)F1	54	84295	pachytene	2	2	0
(DX1s x PWD)F1	55	84295	pachytene	1	1	0
(DX1s x PWD)F1	56	84295	pachytene	1	1	0
(DX1s x PWD)F1	57	84295	pachytene	1	1	0
(DX1s x PWD)F1	58	84295	pachytene	2	2	0
(DX1s x PWD)F1	59	84295	pachytene	0	0	0
(DX1s x PWD)F1	60	84295	pachytene	0	0	0
(DX1s x PWD)F1	61	84295	pachytene	2	2	0
(DX1s x PWD)F1	62	84295	pachytene	0	0	0
(DX1s x PWD)F1	1	84296	pachytene	1	0	1
(DX1s x PWD)F1	2	84296	pachytene	0	0	0
(DX1s x PWD)F1	3	84296	pachytene	1	0	1
(DX1s x PWD)F1	4	84296	pachytene	0	0	0
(DX1s x PWD)F1	5	84296	pachytene	0	0	0
(DX1s x PWD)F1	6	84296	pachytene	0	0	0
(DX1s x PWD)F1	7	84296	pachytene	1	1	0
(DX1s x PWD)F1	8	84296	pachytene	1	1	0
(DX1s x PWD)F1	9	84296	pachytene	2	2	0
(DX1s x PWD)F1	10	84296	pachytene	2	2	0
(DX1s x PWD)F1	11	84296	pachytene	2	2	0
(DX1s x PWD)F1	12	84296	pachytene	0	0	0
(DX1s x PWD)F1	13	84296	pachytene	2	2	0
(DX1s x PWD)F1	14	84296	pachytene	2	2	0
(DX1s x PWD)F1	15	84296	pachytene	0	0	0
(DX1s x PWD)F1	16	84296	pachytene	4	2	2
(DX1s x PWD)F1	17	84296	pachytene	0	0	0
(DX1s x PWD)F1	18	84296	pachytene	3	3	0
(DX1s x PWD)F1	19	84296	pachytene	5	5	0
(DX1s x PWD)F1	20	84296	pachytene	2	1	1
(DX1s x PWD)F1	21	84296	pachytene	3	3	0
(DX1s x PWD)F1	22	84296	pachytene	1	1	0
(DX1s x PWD)F1	23	84296	pachytene	0	0	0
(DX1s x PWD)F1	24	84296	pachytene	2	1	1
(DX1s x PWD)F1	25	84296	pachytene	2	2	0
(DX1s x PWD)F1	26	84296	pachytene	2	2	0
(DX1s x PWD)F1	27	84296	pachytene	3	3	0
(DX1s x PWD)F1	28	84296	pachytene	1	1	0
(DX1s x PWD)F1	29	84296	pachytene	0	0	0
(DX1s x PWD)F1	30	84296	pachytene	1	1	0
(DX1s x PWD)F1	31	84296	pachytene	1	1	0
(DX1s x PWD)F1	32	84296	pachytene	1	0	1
(DX1s x PWD)F1	33	84296	pachytene	1	1	0
(DX1s x PWD)F1	34	84296	pachytene	0	0	0
(DX1s x PWD)F1	35	84296	pachytene	1	1	0
(DX1s x PWD)F1	36	84296	pachytene	1	1	0
(DX1s x PWD)F1	37	84296	pachytene	4	3	1
(DX1s x PWD)F1	38	84296	pachytene	1	1	0
(DX1s x PWD)F1	39	84296	pachytene	4	3	1
(DX1s x PWD)F1	40	84296	pachytene	1	1	0
(DX1s x PWD)F1	41	84296	pachytene	1	1	0
(DX1s x PWD)F1	42	84296	pachytene	2	2	0
(DX1s x PWD)F1	43	84296	pachytene	1	1	0
(DX1s x PWD)F1	44	84296	pachytene	1	1	0
(DX1s x PWD)F1	45	84296	pachytene	1	1	0
(DX1s x PWD)F1	46	84296	pachytene	1	1	0
(DX1s x PWD)F1	47	84296	pachytene	1	1	0
(DX1s x PWD)F1	48	84296	pachytene	0	0	0
(DX1s x PWD)F1	49	84296	pachytene	0	0	0
(DX1s x PWD)F1	50	84296	pachytene	1	1	0
(DX1s x PWD)F1	51	84296	pachytene	1	1	0
(DX1s x PWD)F1	52	84296	pachytene	1	1	0
(DX1s x PWD)F1	53	84296	pachytene	6	6	0
(DX1s x PWD)F1	54	84296	pachytene	1	1	0
(DX1s x PWD)F1	55	84296	pachytene	2	2	0
(DX1s x PWD)F1	56	84296	pachytene	1	1	0
(DX1s x PWD)F1	57	84296	pachytene	2	2	0
(DX1s x PWD)F1	58	84296	pachytene	0	0	0
(DX1s x PWD)F1	59	84296	pachytene	1	0	1
(DX64-69 x PWD)F1	1	82282	pachytene	0	0	0
(DX64-69 x PWD)F1	2	82282	pachytene	1	1	0
(DX64-69 x PWD)F1	3	82282	pachytene	3	3	0
(DX64-69 x PWD)F1	4	82282	pachytene	2	2	0
(DX64-69 x PWD)F1	5	82282	pachytene	2	2	0
(DX64-69 x PWD)F1	6	82282	pachytene	1	0	1
(DX64-69 x PWD)F1	7	82282	pachytene	2	1	1
(DX64-69 x PWD)F1	8	82282	pachytene	0	0	0
(DX64-69 x PWD)F1	9	82282	pachytene	1	1	0
(DX64-69 x PWD)F1	10	82282	pachytene	0	0	0
(DX64-69 x PWD)F1	11	82282	pachytene	1	1	0
(DX64-69 x PWD)F1	12	82282	pachytene	4	3	1
(DX64-69 x PWD)F1	13	82282	pachytene	1	1	0
(DX64-69 x PWD)F1	14	82282	pachytene	1	1	0
(DX64-69 x PWD)F1	15	82282	pachytene	3	2	1
(DX64-69 x PWD)F1	16	82282	pachytene	0	0	0
(DX64-69 x PWD)F1	17	82282	pachytene	1	1	0
(DX64-69 x PWD)F1	18	82282	pachytene	0	0	0
(DX64-69 x PWD)F1	19	82282	pachytene	0	0	0
(DX64-69 x PWD)F1	20	82282	pachytene	1	1	0
(DX64-69 x PWD)F1	21	82282	pachytene	1	1	0
(DX64-69 x PWD)F1	22	82282	pachytene	1	1	0
(DX64-69 x PWD)F1	23	82282	pachytene	1	1	0
(DX64-69 x PWD)F1	24	82282	pachytene	1	1	0
(DX64-69 x PWD)F1	25	82282	pachytene	0	0	0
(DX64-69 x PWD)F1	26	82282	pachytene	3	3	0
(DX64-69 x PWD)F1	27	82282	pachytene	3	2	1
(DX64-69 x PWD)F1	28	82282	pachytene	0	0	0
(DX64-69 x PWD)F1	29	82282	pachytene	1	1	0
(DX64-69 x PWD)F1	30	82282	pachytene	0	0	0
(DX64-69 x PWD)F1	31	82282	pachytene	1	1	0
(DX64-69 x PWD)F1	32	82282	pachytene	1	0	1
(DX64-69 x PWD)F1	33	82282	pachytene	0	0	0
(DX64-69 x PWD)F1	34	82282	pachytene	0	0	0
(DX64-69 x PWD)F1	35	82282	pachytene	2	2	0
(DX64-69 x PWD)F1	36	82282	pachytene	1	1	0
(DX64-69 x PWD)F1	37	82282	pachytene	2	2	0
(DX64-69 x PWD)F1	38	82282	pachytene	2	1	1
(DX64-69 x PWD)F1	39	82282	pachytene	0	0	0
(DX64-69 x PWD)F1	40	82282	pachytene	0	0	0
(DX64-69 x PWD)F1	41	82282	pachytene	0	0	0
(DX64-69 x PWD)F1	42	82282	pachytene	0	0	0
(DX64-69 x PWD)F1	43	82282	pachytene	0	0	0
(DX64-69 x PWD)F1	44	82282	pachytene	1	1	0
(DX64-69 x PWD)F1	45	82282	pachytene	1	1	0
(DX64-69 x PWD)F1	46	82282	pachytene	0	0	0
(DX64-69 x PWD)F1	47	82282	pachytene	2	2	0
(DX64-69 x PWD)F1	1	83085	pachytene	1	1	0
(DX64-69 x PWD)F1	2	83085	pachytene	1	1	0
(DX64-69 x PWD)F1	3	83085	pachytene	2	2	0
(DX64-69 x PWD)F1	4	83085	pachytene	1	1	0
(DX64-69 x PWD)F1	5	83085	pachytene	1	1	0
(DX64-69 x PWD)F1	6	83085	pachytene	2	2	0
(DX64-69 x PWD)F1	7	83085	pachytene	2	1	1
(DX64-69 x PWD)F1	8	83085	pachytene	3	2	1
(DX64-69 x PWD)F1	9	83085	pachytene	1	1	0
(DX64-69 x PWD)F1	10	83085	pachytene	0	0	0
(DX64-69 x PWD)F1	11	83085	pachytene	2	0	2
(DX64-69 x PWD)F1	12	83085	pachytene	2	1	1
(DX64-69 x PWD)F1	13	83085	pachytene	4	4	0
(DX64-69 x PWD)F1	14	83085	pachytene	1	1	0
(DX64-69 x PWD)F1	15	83085	pachytene	4	4	0
(DX64-69 x PWD)F1	16	83085	pachytene	2	1	1
(DX64-69 x PWD)F1	17	83085	pachytene	0	0	0
(DX64-69 x PWD)F1	18	83085	pachytene	0	0	0
(DX64-69 x PWD)F1	19	83085	pachytene	0	0	0
(DX64-69 x PWD)F1	20	83085	pachytene	0	0	0
(DX64-69 x PWD)F1	21	83085	pachytene	1	1	0
(DX64-69 x PWD)F1	22	83085	pachytene	3	2	1
(DX64-69 x PWD)F1	23	83085	pachytene	1	1	0
(DX64-69 x PWD)F1	24	83085	pachytene	0	0	0
(DX64-69 x PWD)F1	25	83085	pachytene	0	0	0
(DX64-69 x PWD)F1	26	83085	pachytene	2	2	0
(DX64-69 x PWD)F1	27	83085	pachytene	1	1	0
(DX64-69 x PWD)F1	28	83085	pachytene	2	2	0
(DX64-69 x PWD)F1	29	83085	pachytene	1	1	0
(DX64-69 x PWD)F1	30	83085	pachytene	1	1	0
(DX64-69 x PWD)F1	31	83085	pachytene	1	1	0
(DX64-69 x PWD)F1	32	83085	pachytene	0	0	0
(DX64-69 x PWD)F1	33	83085	pachytene	1	1	0
(DX64-69 x PWD)F1	34	83085	pachytene	2	2	0
(DX64-69 x PWD)F1	35	83085	pachytene	0	0	0
(DX64-69 x PWD)F1	36	83085	pachytene	1	1	0
(DX64-69 x PWD)F1	37	83085	pachytene	0	0	0
(DX64-69 x PWD)F1	38	83085	pachytene	0	0	0
(DX64-69 x PWD)F1	39	83085	pachytene	2	2	0
(DX64-69 x PWD)F1	40	83085	pachytene	0	0	0
(DX64-69 x PWD)F1	41	83085	pachytene	1	1	0
(DX64-69 x PWD)F1	42	83085	pachytene	0	0	0
(DX64-69 x PWD)F1	43	83085	pachytene	3	3	0
(DX64-69 x PWD)F1	1	83086	pachytene	0	0	0
(DX64-69 x PWD)F1	2	83086	pachytene	1	1	0
(DX64-69 x PWD)F1	3	83086	pachytene	5	4	1
(DX64-69 x PWD)F1	4	83086	pachytene	1	1	0
(DX64-69 x PWD)F1	5	83086	pachytene	5	4	1
(DX64-69 x PWD)F1	6	83086	pachytene	0	0	0
(DX64-69 x PWD)F1	7	83086	pachytene	1	1	0
(DX64-69 x PWD)F1	8	83086	pachytene	1	0	1
(DX64-69 x PWD)F1	9	83086	pachytene	2	1	1
(DX64-69 x PWD)F1	10	83086	pachytene	5	4	1
(DX64-69 x PWD)F1	11	83086	pachytene	0	0	0
(DX64-69 x PWD)F1	12	83086	pachytene	5	3	2
(DX64-69 x PWD)F1	13	83086	pachytene	4	1	3
(DX64-69 x PWD)F1	14	83086	pachytene	2	2	0
(DX64-69 x PWD)F1	15	83086	pachytene	1	1	0
(DX64-69 x PWD)F1	16	83086	pachytene	1	1	0
(DX64-69 x PWD)F1	17	83086	pachytene	2	2	0
(DX64-69 x PWD)F1	18	83086	pachytene	1	1	0
(DX64-69 x PWD)F1	19	83086	pachytene	2	2	0
(DX64-69 x PWD)F1	20	83086	pachytene	2	2	0
(DX64-69 x PWD)F1	21	83086	pachytene	5	3	2
(DX64-69 x PWD)F1	22	83086	pachytene	6	5	1
(DX64-69 x PWD)F1	23	83086	pachytene	1	1	0
(DX64-69 x PWD)F1	24	83086	pachytene	3	3	0
(DX64-69 x PWD)F1	25	83086	pachytene	3	3	0
(DX64-69 x PWD)F1	26	83086	pachytene	1	0	1
(DX64-69 x PWD)F1	27	83086	pachytene	2	2	0
(DX64-69 x PWD)F1	28	83086	pachytene	4	3	1
(DX64-69 x PWD)F1	29	83086	pachytene	5	5	0
(DX64-69 x PWD)F1	30	83086	pachytene	4	2	2
(DX64-69 x PWD)F1	31	83086	pachytene	2	2	0
(DX64-69 x PWD)F1	32	83086	pachytene	1	1	0
(DX64-69 x PWD)F1	33	83086	pachytene	1	1	0
(DX64-69 x PWD)F1	34	83086	pachytene	2	2	0
(DX64-69 x PWD)F1	35	83086	pachytene	1	1	0
(DX64-69 x PWD)F1	36	83086	pachytene	2	0	2
(DX64-69 x PWD)F1	37	83086	pachytene	1	1	0
(DX64-69 x PWD)F1	38	83086	pachytene	0	0	0
(DX64-69 x PWD)F1	39	83086	pachytene	2	2	0
(DX64-69 x PWD)F1	40	83086	pachytene	4	3	1
(DX64-69 x PWD)F1	41	83086	pachytene	0	0	0
(DX64-69 x PWD)F1	42	83086	pachytene	0	0	0
(DX64-69 x PWD)F1	43	83086	pachytene	2	2	0
(DX64-69 x PWD)F1	44	83086	pachytene	2	1	1
(DX64-69 x PWD)F1	45	83086	pachytene	6	5	1
(DX64-69 x PWD)F1	46	83086	pachytene	2	2	0
(DX64-69 x PWD)F1	47	83086	pachytene	3	3	0
(DX64-69 x PWD)F1	1	83087	pachytene	5	3	2
(DX64-69 x PWD)F1	2	83087	pachytene	4	3	1
(DX64-69 x PWD)F1	3	83087	pachytene	3	3	0
(DX64-69 x PWD)F1	4	83087	pachytene	4	3	1
(DX64-69 x PWD)F1	5	83087	pachytene	0	0	0
(DX64-69 x PWD)F1	6	83087	pachytene	2	2	0
(DX64-69 x PWD)F1	7	83087	pachytene	1	1	0
(DX64-69 x PWD)F1	8	83087	pachytene	0	0	0
(DX64-69 x PWD)F1	9	83087	pachytene	2	2	0
(DX64-69 x PWD)F1	10	83087	pachytene	5	4	1
(DX64-69 x PWD)F1	11	83087	pachytene	1	1	0
(DX64-69 x PWD)F1	12	83087	pachytene	0	0	0
(DX64-69 x PWD)F1	13	83087	pachytene	0	0	0
(DX64-69 x PWD)F1	14	83087	pachytene	0	0	0
(DX64-69 x PWD)F1	15	83087	pachytene	0	0	0
(DX64-69 x PWD)F1	16	83087	pachytene	1	1	0
(DX64-69 x PWD)F1	17	83087	pachytene	3	3	0
(DX64-69 x PWD)F1	18	83087	pachytene	2	2	0
(DX64-69 x PWD)F1	19	83087	pachytene	0	0	0
(DX64-69 x PWD)F1	20	83087	pachytene	2	2	0
(DX64-69 x PWD)F1	21	83087	pachytene	0	0	0
(DX64-69 x PWD)F1	22	83087	pachytene	2	2	0
(DX64-69 x PWD)F1	23	83087	pachytene	0	0	0
(DX64-69 x PWD)F1	24	83087	pachytene	0	0	0
(DX64-69 x PWD)F1	25	83087	pachytene	0	0	0
(DX64-69 x PWD)F1	26	83087	pachytene	2	2	0
(DX64-69 x PWD)F1	27	83087	pachytene	0	0	0
(DX64-69 x PWD)F1	28	83087	pachytene	2	2	0
(DX64-69 x PWD)F1	29	83087	pachytene	0	0	0
(DX64-69 x PWD)F1	30	83087	pachytene	1	1	0
(DX64-69 x PWD)F1	31	83087	pachytene	1	1	0
(DX64-69 x PWD)F1	32	83087	pachytene	1	0	1
(DX64-69 x PWD)F1	33	83087	pachytene	1	0	1
(DX64-69 x PWD)F1	34	83087	pachytene	2	2	0
(DX64-69 x PWD)F1	35	83087	pachytene	0	0	0
(DX64-69 x PWD)F1	36	83087	pachytene	0	0	0
(DX64-69 x PWD)F1	37	83087	pachytene	1	0	1
(DX64-69 x PWD)F1	38	83087	pachytene	1	1	0
(DX64-69 x PWD)F1	39	83087	pachytene	1	1	0
(DX64-69 x PWD)F1	40	83087	pachytene	1	1	0
(DX64-69 x PWD)F1	41	83087	pachytene	2	2	0
(DX64-69 x PWD)F1	42	83087	pachytene	1	1	0
(DX64-69 x PWD)F1	43	83087	pachytene	0	0	0
(DX64-69 x PWD)F1	44	83087	pachytene	0	0	0
(DX64-69 x PWD)F1	45	83087	pachytene	1	1	0
(DX64-69 x PWD)F1	46	83087	pachytene	0	0	0
(DX64-69 x PWD)F1	1	83088	pachytene	0	0	0
(DX64-69 x PWD)F1	2	83088	pachytene	2	2	0
(DX64-69 x PWD)F1	3	83088	pachytene	3	2	1
(DX64-69 x PWD)F1	4	83088	pachytene	6	3	3
(DX64-69 x PWD)F1	5	83088	pachytene	4	3	1
(DX64-69 x PWD)F1	6	83088	pachytene	1	1	0
(DX64-69 x PWD)F1	7	83088	pachytene	2	1	1
(DX64-69 x PWD)F1	8	83088	pachytene	0	0	0
(DX64-69 x PWD)F1	9	83088	pachytene	1	1	0
(DX64-69 x PWD)F1	10	83088	pachytene	0	0	0
(DX64-69 x PWD)F1	11	83088	pachytene	2	2	0
(DX64-69 x PWD)F1	12	83088	pachytene	0	0	0
(DX64-69 x PWD)F1	13	83088	pachytene	0	0	0
(DX64-69 x PWD)F1	14	83088	pachytene	1	1	0
(DX64-69 x PWD)F1	15	83088	pachytene	0	0	0
(DX64-69 x PWD)F1	16	83088	pachytene	3	3	0
(DX64-69 x PWD)F1	17	83088	pachytene	2	0	2
(DX64-69 x PWD)F1	18	83088	pachytene	0	0	0
(DX64-69 x PWD)F1	19	83088	pachytene	2	1	1
(DX64-69 x PWD)F1	20	83088	pachytene	0	0	0
(DX64-69 x PWD)F1	21	83088	pachytene	1	1	0
(DX64-69 x PWD)F1	22	83088	pachytene	1	1	0
(DX64-69 x PWD)F1	23	83088	pachytene	1	1	0
(DX64-69 x PWD)F1	24	83088	pachytene	1	1	0
(DX64-69 x PWD)F1	25	83088	pachytene	4	4	0
(DX64-69 x PWD)F1	26	83088	pachytene	4	3	1
(DX64-69 x PWD)F1	27	83088	pachytene	1	1	0
(DX64-69 x PWD)F1	28	83088	pachytene	2	2	0
(DX64-69 x PWD)F1	29	83088	pachytene	1	1	0
(DX64-69 x PWD)F1	30	83088	pachytene	0	0	0
(DX64-69 x PWD)F1	31	83088	pachytene	3	3	0
(DX64-69 x PWD)F1	32	83088	pachytene	2	2	0
(DX64-69 x PWD)F1	33	83088	pachytene	3	3	0
(DX64-69 x PWD)F1	34	83088	pachytene	1	0	1
(DX64-69 x PWD)F1	35	83088	pachytene	2	2	0
(DX64-69 x PWD)F1	36	83088	pachytene	4	3	1
(DX64-69 x PWD)F1	37	83088	pachytene	1	1	0
(DX64-69 x PWD)F1	38	83088	pachytene	3	3	0
(DX64-69 x PWD)F1	39	83088	pachytene	1	1	0
(DX64-69 x PWD)F1	40	83088	pachytene	1	1	0
(DX64-69 x PWD)F1	41	83088	pachytene	3	3	0
(DX64-69 x PWD)F1	42	83088	pachytene	0	0	0
(DX64-69 x PWD)F1	43	83088	pachytene	2	2	0
(DX64-69 x PWD)F1	44	83088	pachytene	1	1	0
(DX64-69 x PWD)F1	45	83088	pachytene	0	0	0
(DX64-69 x PWD)F1	46	83088	pachytene	0	0	0
(DX64-69 x PWD)F1	47	83088	pachytene	1	1	0
(DX64-69 x PWD)F1	48	83088	pachytene	1	1	0
(DX64-69 x PWD)F1	1	83090	pachytene	0	0	0
(DX64-69 x PWD)F1	2	83090	pachytene	4	4	0
(DX64-69 x PWD)F1	3	83090	pachytene	1	1	0
(DX64-69 x PWD)F1	4	83090	pachytene	3	3	0
(DX64-69 x PWD)F1	5	83090	pachytene	2	2	0
(DX64-69 x PWD)F1	6	83090	pachytene	3	2	1
(DX64-69 x PWD)F1	7	83090	pachytene	1	1	0
(DX64-69 x PWD)F1	8	83090	pachytene	2	2	0
(DX64-69 x PWD)F1	9	83090	pachytene	6	3	3
(DX64-69 x PWD)F1	10	83090	pachytene	0	0	0
(DX64-69 x PWD)F1	11	83090	pachytene	2	1	1
(DX64-69 x PWD)F1	12	83090	pachytene	1	1	0
(DX64-69 x PWD)F1	13	83090	pachytene	1	0	1
(DX64-69 x PWD)F1	14	83090	pachytene	2	1	1
(DX64-69 x PWD)F1	15	83090	pachytene	1	0	1
(DX64-69 x PWD)F1	16	83090	pachytene	2	2	0
(DX64-69 x PWD)F1	17	83090	pachytene	2	1	1
(DX64-69 x PWD)F1	18	83090	pachytene	0	0	0
(DX64-69 x PWD)F1	19	83090	pachytene	1	0	1
(DX64-69 x PWD)F1	20	83090	pachytene	0	0	0
(DX64-69 x PWD)F1	21	83090	pachytene	3	3	0
(DX64-69 x PWD)F1	22	83090	pachytene	2	2	0
(DX64-69 x PWD)F1	23	83090	pachytene	2	2	0
(DX64-69 x PWD)F1	24	83090	pachytene	3	1	2
(DX64-69 x PWD)F1	25	83090	pachytene	1	1	0
(DX64-69 x PWD)F1	26	83090	pachytene	2	1	1
(DX64-69 x PWD)F1	27	83090	pachytene	2	2	0
(DX64-69 x PWD)F1	28	83090	pachytene	1	0	1
(DX64-69 x PWD)F1	29	83090	pachytene	4	4	0
(DX64-69 x PWD)F1	30	83090	pachytene	2	1	1
(DX64-69 x PWD)F1	31	83090	pachytene	2	2	0
(DX64-69 x PWD)F1	32	83090	pachytene	0	0	0
(DX64-69 x PWD)F1	33	83090	pachytene	2	2	0
(DX64-69 x PWD)F1	34	83090	pachytene	0	0	0
(DX64-69 x PWD)F1	35	83090	pachytene	4	3	1
(DX64-69 x PWD)F1	36	83090	pachytene	2	2	0
(DX64-69 x PWD)F1	37	83090	pachytene	1	1	0
(DX64-69 x PWD)F1	38	83090	pachytene	0	0	0
(DX64-69 x PWD)F1	39	83090	pachytene	1	1	0
(DX64-69 x PWD)F1	40	83090	pachytene	2	1	1
(DX64-69 x PWD)F1	41	83090	pachytene	0	0	0
(DX64-69 x PWD)F1	42	83090	pachytene	0	0	0
(DX64-69 x PWD)F1	43	83090	pachytene	0	0	0
(DX64-69 x PWD)F1	44	83090	pachytene	3	3	0
(DX64-69 x PWD)F1	45	83090	pachytene	0	0	0
(DX64-69 x PWD)F1	46	83090	pachytene	1	1	0
(DX64-69 x PWD)F1	47	83090	pachytene	0	0	0
(DX64-69 x PWD)F1	48	83090	pachytene	1	1	0
(DX64-69 x PWD)F1	49	83090	pachytene	3	2	1
(DX64-69 x PWD)F1	50	83090	pachytene	2	1	1
(DX64-69 x PWD)F1	51	83090	pachytene	0	0	0
(DX64-69 x PWD)F1	52	83090	pachytene	1	1	0
(DX64-69 x PWD)F1	1	85329	pachytene	0	0	0
(DX64-69 x PWD)F1	2	85329	pachytene	1	1	0
(DX64-69 x PWD)F1	3	85329	pachytene	1	1	0
(DX64-69 x PWD)F1	4	85329	pachytene	2	1	1
(DX64-69 x PWD)F1	5	85329	pachytene	0	0	0
(DX64-69 x PWD)F1	6	85329	pachytene	1	1	0
(DX64-69 x PWD)F1	7	85329	pachytene	2	1	1
(DX64-69 x PWD)F1	8	85329	pachytene	3	2	1
(DX64-69 x PWD)F1	9	85329	pachytene	4	2	2
(DX64-69 x PWD)F1	10	85329	pachytene	0	0	0
(DX64-69 x PWD)F1	11	85329	pachytene	2	1	1
(DX64-69 x PWD)F1	12	85329	pachytene	1	1	0
(DX64-69 x PWD)F1	13	85329	pachytene	2	2	0
(DX64-69 x PWD)F1	14	85329	pachytene	0	0	0
(DX64-69 x PWD)F1	15	85329	pachytene	4	3	1
(DX64-69 x PWD)F1	16	85329	pachytene	0	0	0
(DX64-69 x PWD)F1	17	85329	pachytene	1	0	1
(DX64-69 x PWD)F1	18	85329	pachytene	1	1	0
(DX64-69 x PWD)F1	19	85329	pachytene	3	3	0
(DX64-69 x PWD)F1	20	85329	pachytene	4	4	0
(DX64-69 x PWD)F1	21	85329	pachytene	2	2	0
(DX64-69 x PWD)F1	22	85329	pachytene	3	2	1
(DX64-69 x PWD)F1	23	85329	pachytene	1	1	0
(DX64-69 x PWD)F1	24	85329	pachytene	1	0	1
(DX64-69 x PWD)F1	25	85329	pachytene	0	0	0
(DX64-69 x PWD)F1	26	85329	pachytene	2	1	1
(DX64-69 x PWD)F1	27	85329	pachytene	2	2	0
(DX64-69 x PWD)F1	28	85329	pachytene	2	1	1
(DX64-69 x PWD)F1	29	85329	pachytene	0	0	0
(DX64-69 x PWD)F1	30	85329	pachytene	0	0	0
(DX64-69 x PWD)F1	31	85329	pachytene	3	3	0
(DX64-69 x PWD)F1	32	85329	pachytene	1	0	1
(DX64-69 x PWD)F1	33	85329	pachytene	0	0	0
(DX64-69 x PWD)F1	34	85329	pachytene	0	0	0
(DX64-69 x PWD)F1	35	85329	pachytene	1	0	1
(DX64-69 x PWD)F1	36	85329	pachytene	0	0	0
(DX64-69 x PWD)F1	37	85329	pachytene	0	0	0
(DX64-69 x PWD)F1	38	85329	pachytene	1	1	0
(DX64-69 x PWD)F1	39	85329	pachytene	0	0	0
(DX64-69 x PWD)F1	40	85329	pachytene	1	1	0
(DX64-69 x PWD)F1	41	85329	pachytene	4	4	0
(DX64-69 x PWD)F1	42	85329	pachytene	0	0	0
(DX64-69 x PWD)F1	43	85329	pachytene	0	0	0
(DX64-69 x PWD)F1	44	85329	pachytene	0	0	0
(DX64-69 x PWD)F1	45	85329	pachytene	2	1	1
(DX64-69 x PWD)F1	46	85329	pachytene	4	3	1
(DX64-69 x PWD)F1	47	85329	pachytene	0	0	0
(DX64-69 x PWD)F1	48	85329	pachytene	1	1	0
(DX64-69 x PWD)F1	49	85329	pachytene	0	0	0
(DX64-69 x PWD)F1	50	85329	pachytene	1	0	1
(DX64-69 x PWD)F1	51	85329	pachytene	0	0	0
(DX64-69 x PWD)F1	52	85329	pachytene	3	2	1
(DX64-69 x PWD)F1	53	85329	pachytene	0	0	0
(DX64-69 x PWD)F1	54	85329	pachytene	1	1	0
(DX64-69 x PWD)F1	55	85329	pachytene	0	0	0
(DX64-69 x PWD)F1	56	85329	pachytene	3	2	1
(DX64-69 x PWD)F1	57	85329	pachytene	1	1	0
(DX64-69 x PWD)F1	58	85329	pachytene	1	1	0
(DX64-69 x PWD)F1	59	85329	pachytene	0	0	0
(DX64-69 x PWD)F1	60	85329	pachytene	1	0	1
(DX64-69 x PWD)F1	61	85329	pachytene	0	0	0
(DX64-69 x PWD)F1	62	85329	pachytene	2	0	2
(DX64-69 x PWD)F1	1	85332	pachytene	0	0	0
(DX64-69 x PWD)F1	2	85332	pachytene	1	1	0
(DX64-69 x PWD)F1	3	85332	pachytene	2	2	0
(DX64-69 x PWD)F1	4	85332	pachytene	1	1	0
(DX64-69 x PWD)F1	5	85332	pachytene	0	0	0
(DX64-69 x PWD)F1	6	85332	pachytene	0	0	0
(DX64-69 x PWD)F1	7	85332	pachytene	2	1	1
(DX64-69 x PWD)F1	8	85332	pachytene	0	0	0
(DX64-69 x PWD)F1	9	85332	pachytene	0	0	0
(DX64-69 x PWD)F1	10	85332	pachytene	3	0	3
(DX64-69 x PWD)F1	11	85332	pachytene	1	1	0
(DX64-69 x PWD)F1	12	85332	pachytene	1	1	0
(DX64-69 x PWD)F1	13	85332	pachytene	1	1	0
(DX64-69 x PWD)F1	14	85332	pachytene	2	2	0
(DX64-69 x PWD)F1	15	85332	pachytene	2	1	1
(DX64-69 x PWD)F1	16	85332	pachytene	1	1	0
(DX64-69 x PWD)F1	17	85332	pachytene	1	1	0
(DX64-69 x PWD)F1	18	85332	pachytene	0	0	0
(DX64-69 x PWD)F1	19	85332	pachytene	1	0	1
(DX64-69 x PWD)F1	20	85332	pachytene	0	0	0
(DX64-69 x PWD)F1	21	85332	pachytene	1	1	0
(DX64-69 x PWD)F1	22	85332	pachytene	0	0	0
(DX64-69 x PWD)F1	23	85332	pachytene	1	1	0
(DX64-69 x PWD)F1	24	85332	pachytene	0	0	0
(DX64-69 x PWD)F1	25	85332	pachytene	0	0	0
(DX64-69 x PWD)F1	26	85332	pachytene	1	1	0
(DX64-69 x PWD)F1	27	85332	pachytene	0	0	0
(DX64-69 x PWD)F1	28	85332	pachytene	1	1	0
(DX64-69 x PWD)F1	29	85332	pachytene	2	2	0
(DX64-69 x PWD)F1	30	85332	pachytene	3	2	1
(DX64-69 x PWD)F1	31	85332	pachytene	1	1	0
(DX64-69 x PWD)F1	32	85332	pachytene	2	2	0
(DX64-69 x PWD)F1	33	85332	pachytene	0	0	0
(DX64-69 x PWD)F1	34	85332	pachytene	3	3	0
(DX64-69 x PWD)F1	35	85332	pachytene	1	1	0
(DX64-69 x PWD)F1	36	85332	pachytene	3	3	0
(DX64-69 x PWD)F1	37	85332	pachytene	0	0	0
(DX64-69 x PWD)F1	38	85332	pachytene	1	0	1
(DX64-69 x PWD)F1	39	85332	pachytene	0	0	0
(DX64-69 x PWD)F1	40	85332	pachytene	1	1	0
(DX64-69 x PWD)F1	41	85332	pachytene	1	1	0
(DX64-69 x PWD)F1	42	85332	pachytene	1	1	0
(DX64-69 x PWD)F1	43	85332	pachytene	0	0	0
(DX64-69 x PWD)F1	44	85332	pachytene	1	1	0
(DX64-69 x PWD)F1	45	85332	pachytene	3	2	1
(DX64-69 x PWD)F1	46	85332	pachytene	0	0	0
(DX64-69 x PWD)F1	47	85332	pachytene	1	1	0
(DX64-69 x PWD)F1	48	85332	pachytene	0	0	0
(DX64-69 x PWD)F1	49	85332	pachytene	1	0	1
(DX64-69 x PWD)F1	50	85332	pachytene	1	0	1
(DX64-69 x PWD)F1	51	85332	pachytene	1	1	0
(DX64-69 x PWD)F1	52	85332	pachytene	2	2	0
(DX64-69 x PWD)F1	53	85332	pachytene	1	1	0
(DX64-69 x PWD)F1	54	85332	pachytene	2	2	0
(DX64-69 x PWD)F1	55	85332	pachytene	1	1	0
(DX64-69 x PWD)F1	56	85332	pachytene	3	3	0
(DX64-69 x PWD)F1	57	85332	pachytene	0	0	0
(DX64-69 x PWD)F1	58	85332	pachytene	2	2	0
(DX66-69 x PWD)F1	1	97104	pachytene	0	0	0
(DX66-69 x PWD)F1	2	97104	pachytene	0	0	0
(DX66-69 x PWD)F1	3	97104	pachytene	1	1	0
(DX66-69 x PWD)F1	4	97104	pachytene	1	1	0
(DX66-69 x PWD)F1	5	97104	pachytene	2	0	2
(DX66-69 x PWD)F1	6	97104	pachytene	0	0	0
(DX66-69 x PWD)F1	7	97104	pachytene	0	0	0
(DX66-69 x PWD)F1	8	97104	pachytene	2	1	1
(DX66-69 x PWD)F1	9	97104	pachytene	2	1	1
(DX66-69 x PWD)F1	10	97104	pachytene	2	2	0
(DX66-69 x PWD)F1	11	97104	pachytene	4	2	2
(DX66-69 x PWD)F1	12	97104	pachytene	4	4	0
(DX66-69 x PWD)F1	13	97104	pachytene	2	2	0
(DX66-69 x PWD)F1	14	97104	pachytene	0	0	0
(DX66-69 x PWD)F1	15	97104	pachytene	0	0	0
(DX66-69 x PWD)F1	16	97104	pachytene	4	3	1
(DX66-69 x PWD)F1	17	97104	pachytene	1	1	0
(DX66-69 x PWD)F1	18	97104	pachytene	1	1	0
(DX66-69 x PWD)F1	19	97104	pachytene	1	1	0
(DX66-69 x PWD)F1	20	97104	pachytene	1	1	0
(DX66-69 x PWD)F1	21	97104	pachytene	0	0	0
(DX66-69 x PWD)F1	22	97104	pachytene	0	0	0
(DX66-69 x PWD)F1	23	97104	pachytene	1	1	0
(DX66-69 x PWD)F1	24	97104	pachytene	1	1	0
(DX66-69 x PWD)F1	25	97104	pachytene	0	0	0
(DX66-69 x PWD)F1	26	97104	pachytene	0	0	0
(DX66-69 x PWD)F1	27	97104	pachytene	2	2	0
(DX66-69 x PWD)F1	28	97104	pachytene	0	0	0
(DX66-69 x PWD)F1	29	97104	pachytene	1	1	0
(DX66-69 x PWD)F1	30	97104	pachytene	2	0	2
(DX66-69 x PWD)F1	31	97104	pachytene	0	0	0
(DX66-69 x PWD)F1	32	97104	pachytene	0	0	0
(DX66-69 x PWD)F1	33	97104	pachytene	0	0	0
(DX66-69 x PWD)F1	34	97104	pachytene	1	1	0
(DX66-69 x PWD)F1	35	97104	pachytene	0	0	0
(DX66-69 x PWD)F1	36	97104	pachytene	1	1	0
(DX66-69 x PWD)F1	37	97104	pachytene	0	0	0
(DX66-69 x PWD)F1	38	97104	pachytene	0	0	0
(DX66-69 x PWD)F1	39	97104	pachytene	0	0	0
(DX66-69 x PWD)F1	40	97104	pachytene	1	1	0
(DX66-69 x PWD)F1	41	97104	pachytene	2	2	0
(DX66-69 x PWD)F1	42	97104	pachytene	4	3	1
(DX66-69 x PWD)F1	43	97104	pachytene	2	0	2
(DX66-69 x PWD)F1	44	97104	pachytene	0	0	0
(DX66-69 x PWD)F1	45	97104	pachytene	1	0	1
(DX66-69 x PWD)F1	46	97104	pachytene	0	0	0
(DX66-69 x PWD)F1	47	97104	pachytene	2	0	2
(DX66-69 x PWD)F1	48	97104	pachytene	0	0	0
(DX66-69 x PWD)F1	49	97104	pachytene	1	1	0
(DX66-69 x PWD)F1	50	97104	pachytene	1	1	0
(DX66-69 x PWD)F1	51	97104	pachytene	3	3	0
(DX66-69 x PWD)F1	52	97104	pachytene	3	3	0
(DX66-69 x PWD)F1	53	97104	pachytene	3	3	0
(DX66-69 x PWD)F1	54	97104	pachytene	3	3	0
(DX66-69 x PWD)F1	55	97104	pachytene	0	0	0
(DX66-69 x PWD)F1	56	97104	pachytene	2	2	0
(DX66-69 x PWD)F1	57	97104	pachytene	1	1	0
(DX66-69 x PWD)F1	58	97104	pachytene	1	0	1
(DX66-69 x PWD)F1	59	97104	pachytene	2	1	1
(DX66-69 x PWD)F1	60	97104	pachytene	2	2	0
(DX66-69 x PWD)F1	61	97104	pachytene	0	0	0
(DX66-69 x PWD)F1	62	97104	pachytene	2	1	1
(DX66-69 x PWD)F1	63	97104	pachytene	0	0	0
(DX66-69 x PWD)F1	1	97113	pachytene	2	2	0
(DX66-69 x PWD)F1	2	97113	pachytene	1	1	0
(DX66-69 x PWD)F1	3	97113	pachytene	2	1	1
(DX66-69 x PWD)F1	4	97113	pachytene	0	0	0
(DX66-69 x PWD)F1	5	97113	pachytene	1	1	0
(DX66-69 x PWD)F1	6	97113	pachytene	2	2	0
(DX66-69 x PWD)F1	7	97113	pachytene	1	0	1
(DX66-69 x PWD)F1	8	97113	pachytene	3	2	1
(DX66-69 x PWD)F1	9	97113	pachytene	2	2	0
(DX66-69 x PWD)F1	10	97113	pachytene	2	0	2
(DX66-69 x PWD)F1	11	97113	pachytene	0	0	0
(DX66-69 x PWD)F1	12	97113	pachytene	1	1	0
(DX66-69 x PWD)F1	13	97113	pachytene	1	1	0
(DX66-69 x PWD)F1	14	97113	pachytene	0	0	0
(DX66-69 x PWD)F1	15	97113	pachytene	3	3	0
(DX66-69 x PWD)F1	16	97113	pachytene	4	3	1
(DX66-69 x PWD)F1	17	97113	pachytene	1	1	0
(DX66-69 x PWD)F1	18	97113	pachytene	1	1	0
(DX66-69 x PWD)F1	19	97113	pachytene	1	0	1
(DX66-69 x PWD)F1	20	97113	pachytene	2	2	0
(DX66-69 x PWD)F1	21	97113	pachytene	5	4	1
(DX66-69 x PWD)F1	22	97113	pachytene	3	3	0
(DX66-69 x PWD)F1	23	97113	pachytene	5	4	1
(DX66-69 x PWD)F1	24	97113	pachytene	4	3	1
(DX66-69 x PWD)F1	25	97113	pachytene	5	5	0
(DX66-69 x PWD)F1	26	97113	pachytene	1	1	0
(DX66-69 x PWD)F1	27	97113	pachytene	0	0	0
(DX66-69 x PWD)F1	28	97113	pachytene	3	3	0
(DX66-69 x PWD)F1	29	97113	pachytene	6	4	2
(DX66-69 x PWD)F1	30	97113	pachytene	1	1	0
(DX66-69 x PWD)F1	31	97113	pachytene	2	2	0
(DX66-69 x PWD)F1	32	97113	pachytene	4	2	2
(DX66-69 x PWD)F1	33	97113	pachytene	0	0	0
(DX66-69 x PWD)F1	34	97113	pachytene	2	2	0
(DX66-69 x PWD)F1	35	97113	pachytene	1	1	0
(DX66-69 x PWD)F1	36	97113	pachytene	0	0	0
(DX66-69 x PWD)F1	37	97113	pachytene	0	0	0
(DX66-69 x PWD)F1	38	97113	pachytene	1	1	0
(DX66-69 x PWD)F1	39	97113	pachytene	3	3	0
(DX66-69 x PWD)F1	40	97113	pachytene	2	2	0
(DX66-69 x PWD)F1	41	97113	pachytene	4	4	0
(DX66-69 x PWD)F1	42	97113	pachytene	1	1	0
(DX66-69 x PWD)F1	43	97113	pachytene	0	0	0
(DX66-69 x PWD)F1	44	97113	pachytene	0	0	0
(DX66-69 x PWD)F1	45	97113	pachytene	0	0	0
(DX66-69 x PWD)F1	46	97113	pachytene	2	1	1
(DX66-69 x PWD)F1	47	97113	pachytene	2	1	1
(DX66-69 x PWD)F1	48	97113	pachytene	4	4	0
(DX66-69 x PWD)F1	49	97113	pachytene	1	1	0
(DX66-69 x PWD)F1	50	97113	pachytene	2	2	0
(DX66-69 x PWD)F1	51	97113	pachytene	1	1	0
(DX66-69 x PWD)F1	52	97113	pachytene	1	1	0
(DX66-69 x PWD)F1	53	97113	pachytene	0	0	0
(DX66-69 x PWD)F1	54	97113	pachytene	1	1	0
(DX66-69 x PWD)F1	55	97113	pachytene	1	1	0
(DX66-69 x PWD)F1	56	97113	pachytene	2	1	1
(DX66-69 x PWD)F1	57	97113	pachytene	2	2	0
(DX66-69 x PWD)F1	58	97113	pachytene	2	2	0
(DX66-69 x PWD)F1	59	97113	pachytene	3	3	0
(DX66-69 x PWD)F1	60	97113	pachytene	5	4	1
(DX66-69 x PWD)F1	61	97113	pachytene	1	1	0
(DX66-69 x PWD)F1	62	97113	pachytene	3	3	0
(DX66-69 x PWD)F1	63	97113	pachytene	0	0	0
(DX66-69 x PWD)F1	64	97113	pachytene	2	2	0
(DX66-69 x PWD)F1	1	97114	pachytene	0	0	0
(DX66-69 x PWD)F1	2	97114	pachytene	0	0	0
(DX66-69 x PWD)F1	3	97114	pachytene	5	4	1
(DX66-69 x PWD)F1	4	97114	pachytene	0	0	0
(DX66-69 x PWD)F1	5	97114	pachytene	6	4	2
(DX66-69 x PWD)F1	6	97114	pachytene	2	2	0
(DX66-69 x PWD)F1	7	97114	pachytene	1	1	0
(DX66-69 x PWD)F1	8	97114	pachytene	1	1	0
(DX66-69 x PWD)F1	9	97114	pachytene	3	3	0
(DX66-69 x PWD)F1	10	97114	pachytene	1	1	0
(DX66-69 x PWD)F1	11	97114	pachytene	1	1	0
(DX66-69 x PWD)F1	12	97114	pachytene	0	0	0
(DX66-69 x PWD)F1	13	97114	pachytene	0	0	0
(DX66-69 x PWD)F1	14	97114	pachytene	2	2	0
(DX66-69 x PWD)F1	15	97114	pachytene	0	0	0
(DX66-69 x PWD)F1	16	97114	pachytene	1	1	0
(DX66-69 x PWD)F1	17	97114	pachytene	0	0	0
(DX66-69 x PWD)F1	18	97114	pachytene	4	3	1
(DX66-69 x PWD)F1	19	97114	pachytene	2	2	0
(DX66-69 x PWD)F1	20	97114	pachytene	1	1	0
(DX66-69 x PWD)F1	21	97114	pachytene	1	1	0
(DX66-69 x PWD)F1	22	97114	pachytene	2	2	0
(DX66-69 x PWD)F1	23	97114	pachytene	1	1	0
(DX66-69 x PWD)F1	24	97114	pachytene	2	2	0
(DX66-69 x PWD)F1	25	97114	pachytene	2	2	0
(DX66-69 x PWD)F1	26	97114	pachytene	0	0	0
(DX66-69 x PWD)F1	27	97114	pachytene	1	1	0
(DX66-69 x PWD)F1	28	97114	pachytene	1	1	0
(DX66-69 x PWD)F1	29	97114	pachytene	0	0	0
(DX66-69 x PWD)F1	30	97114	pachytene	0	0	0
(DX66-69 x PWD)F1	31	97114	pachytene	1	1	0
(DX66-69 x PWD)F1	32	97114	pachytene	2	1	1
(DX66-69 x PWD)F1	33	97114	pachytene	3	2	1
(DX66-69 x PWD)F1	34	97114	pachytene	0	0	0
(DX66-69 x PWD)F1	35	97114	pachytene	0	0	0
(DX66-69 x PWD)F1	36	97114	pachytene	0	0	0
(DX66-69 x PWD)F1	37	97114	pachytene	2	2	0
(DX66-69 x PWD)F1	38	97114	pachytene	0	0	0
(DX66-69 x PWD)F1	39	97114	pachytene	1	0	0
(DX66-69 x PWD)F1	40	97114	pachytene	3	3	0
(DX66-69 x PWD)F1	41	97114	pachytene	1	1	0
(DX66-69 x PWD)F1	42	97114	pachytene	0	0	0
(DX66-69 x PWD)F1	43	97114	pachytene	0	0	0
(DX66-69 x PWD)F1	44	97114	pachytene	2	2	0
(DX66-69 x PWD)F1	45	97114	pachytene	0	0	0
(DX66-69 x PWD)F1	46	97114	pachytene	3	3	0
(DX66-69 x PWD)F1	47	97114	pachytene	1	1	0
(DX66-69 x PWD)F1	48	97114	pachytene	1	1	0
(DX66-69 x PWD)F1	49	97114	pachytene	3	2	1
(DX66-69 x PWD)F1	50	97114	pachytene	2	2	0
(DX66-69 x PWD)F1	51	97114	pachytene	0	0	0
(DX66-69 x PWD)F1	52	97114	pachytene	2	1	1
(DX66-69 x PWD)F1	53	97114	pachytene	0	0	0
(DX66-69 x PWD)F1	54	97114	pachytene	4	4	0
(DX66-69 x PWD)F1	55	97114	pachytene	1	1	0
(DX66-69 x PWD)F1	56	97114	pachytene	0	0	0
(DX66-69 x PWD)F1	57	97114	pachytene	0	0	0
(DX66-69 x PWD)F1	58	97114	pachytene	0	0	0
(DX66-69 x PWD)F1	59	97114	pachytene	2	2	0
(DX66-69 x PWD)F1	60	97114	pachytene	3	2	1
(DX66-69 x PWD)F1	61	97114	pachytene	2	2	0
(DX66-69 x PWD)F1	62	97114	pachytene	0	0	0
(DX66-69 x PWD)F1	1	98608	pachytene	1	1	0
(DX66-69 x PWD)F1	2	98608	pachytene	1	1	0
(DX66-69 x PWD)F1	3	98608	pachytene	3	2	1
(DX66-69 x PWD)F1	4	98608	pachytene	6	6	0
(DX66-69 x PWD)F1	5	98608	pachytene	6	4	2
(DX66-69 x PWD)F1	6	98608	pachytene	1	0	1
(DX66-69 x PWD)F1	7	98608	pachytene	1	1	0
(DX66-69 x PWD)F1	8	98608	pachytene	1	1	0
(DX66-69 x PWD)F1	9	98608	pachytene	3	2	1
(DX66-69 x PWD)F1	10	98608	pachytene	1	0	1
(DX66-69 x PWD)F1	11	98608	pachytene	4	4	0
(DX66-69 x PWD)F1	12	98608	pachytene	3	3	0
(DX66-69 x PWD)F1	13	98608	pachytene	1	1	0
(DX66-69 x PWD)F1	14	98608	pachytene	1	1	0
(DX66-69 x PWD)F1	15	98608	pachytene	2	2	0
(DX66-69 x PWD)F1	16	98608	pachytene	3	3	0
(DX66-69 x PWD)F1	17	98608	pachytene	0	0	0
(DX66-69 x PWD)F1	18	98608	pachytene	2	2	0
(DX66-69 x PWD)F1	19	98608	pachytene	1	1	0
(DX66-69 x PWD)F1	20	98608	pachytene	1	1	0
(DX66-69 x PWD)F1	21	98608	pachytene	1	0	1
(DX66-69 x PWD)F1	22	98608	pachytene	2	2	0
(DX66-69 x PWD)F1	23	98608	pachytene	0	0	0
(DX66-69 x PWD)F1	24	98608	pachytene	0	0	0
(DX66-69 x PWD)F1	25	98608	pachytene	1	0	1
(DX66-69 x PWD)F1	26	98608	pachytene	2	1	1
(DX66-69 x PWD)F1	27	98608	pachytene	4	3	1
(DX66-69 x PWD)F1	28	98608	pachytene	5	3	2
(DX66-69 x PWD)F1	29	98608	pachytene	0	0	0
(DX66-69 x PWD)F1	30	98608	pachytene	1	1	0
(DX66-69 x PWD)F1	31	98608	pachytene	0	0	0
(DX66-69 x PWD)F1	32	98608	pachytene	4	4	0
(DX66-69 x PWD)F1	33	98608	pachytene	1	1	0
(DX66-69 x PWD)F1	34	98608	pachytene	2	1	1
(DX66-69 x PWD)F1	35	98608	pachytene	0	0	0
(DX66-69 x PWD)F1	36	98608	pachytene	0	0	0
(DX66-69 x PWD)F1	37	98608	pachytene	1	1	0
(DX66-69 x PWD)F1	38	98608	pachytene	1	1	0
(DX66-69 x PWD)F1	39	98608	pachytene	0	0	0
(DX66-69 x PWD)F1	40	98608	pachytene	1	1	0
(DX66-69 x PWD)F1	41	98608	pachytene	2	2	0
(DX66-69 x PWD)F1	42	98608	pachytene	2	2	0
(DX66-69 x PWD)F1	43	98608	pachytene	2	2	0
(DX66-69 x PWD)F1	44	98608	pachytene	1	1	0
(DX66-69 x PWD)F1	45	98608	pachytene	2	2	0
(DX66-69 x PWD)F1	46	98608	pachytene	1	1	0
(DX66-69 x PWD)F1	47	98608	pachytene	1	1	0
(DX66-69 x PWD)F1	48	98608	pachytene	1	1	0
(DX66-69 x PWD)F1	49	98608	pachytene	0	0	0
(DX66-69 x PWD)F1	50	98608	pachytene	1	0	1
(DX66-69 x PWD)F1	51	98608	pachytene	0	0	0
(DX66-69 x PWD)F1	52	98608	pachytene	1	1	0
(DX66-69 x PWD)F1	53	98608	pachytene	1	1	0
(DX66-69 x PWD)F1	54	98608	pachytene	0	0	0
(DX66-69 x PWD)F1	55	98608	pachytene	2	0	2
(DX66-69 x PWD)F1	56	98608	pachytene	0	0	0
(DX66-69 x PWD)F1	57	98608	pachytene	0	0	0
(DX66-69 x PWD)F1	58	98608	pachytene	3	3	0
(DX66-69 x PWD)F1	59	98608	pachytene	1	1	0
(DX66-69 x PWD)F1	60	98608	pachytene	1	1	0
(DX66-69 x PWD)F1	61	98608	pachytene	1	1	0
(DX66-69 x PWD)F1	62	98608	pachytene	3	2	1
(DX66-69 x PWD)F1	63	98608	pachytene	2	2	0
(DX66-69 x PWD)F1	64	98608	pachytene	0	0	0
(DX66-69 x PWD)F1	65	98608	pachytene	4	4	0
(DX66-69 x PWD)F1	66	98608	pachytene	1	0	1
(DX66-69 x PWD)F1	67	98608	pachytene	3	3	0
(DX66-69 x PWD)F1	68	98608	pachytene	0	0	0
(DX66-69 x PWD)F1	69	98608	pachytene	3	3	0
(DX66-69 x PWD)F1	70	98608	pachytene	1	1	0
(DX66-69 x PWD)F1	71	98608	pachytene	1	1	0
(DX66-69 x PWD)F1	72	98608	pachytene	0	0	0
(DX66-69 x PWD)F1	73	98608	pachytene	3	3	0
(DX66-69 x PWD)F1	74	98608	pachytene	1	1	0
(DX66-69 x PWD)F1	75	98608	pachytene	2	1	1
(DX66-69 x PWD)F1	1	98609	pachytene	6	4	2
(DX66-69 x PWD)F1	2	98609	pachytene	1	1	0
(DX66-69 x PWD)F1	3	98609	pachytene	3	3	0
(DX66-69 x PWD)F1	4	98609	pachytene	2	1	1
(DX66-69 x PWD)F1	5	98609	pachytene	2	1	1
(DX66-69 x PWD)F1	6	98609	pachytene	0	0	0
(DX66-69 x PWD)F1	7	98609	pachytene	1	1	0
(DX66-69 x PWD)F1	8	98609	pachytene	2	2	0
(DX66-69 x PWD)F1	9	98609	pachytene	0	0	0
(DX66-69 x PWD)F1	10	98609	pachytene	2	2	0
(DX66-69 x PWD)F1	11	98609	pachytene	1	1	0
(DX66-69 x PWD)F1	12	98609	pachytene	2	2	0
(DX66-69 x PWD)F1	13	98609	pachytene	0	0	0
(DX66-69 x PWD)F1	14	98609	pachytene	4	3	1
(DX66-69 x PWD)F1	15	98609	pachytene	0	0	0
(DX66-69 x PWD)F1	16	98609	pachytene	0	0	0
(DX66-69 x PWD)F1	17	98609	pachytene	1	1	0
(DX66-69 x PWD)F1	18	98609	pachytene	1	0	1
(DX66-69 x PWD)F1	19	98609	pachytene	2	2	0
(DX66-69 x PWD)F1	20	98609	pachytene	0	0	0
(DX66-69 x PWD)F1	21	98609	pachytene	0	0	0
(DX66-69 x PWD)F1	22	98609	pachytene	1	1	0
(DX66-69 x PWD)F1	23	98609	pachytene	0	0	0
(DX66-69 x PWD)F1	24	98609	pachytene	2	2	0
(DX66-69 x PWD)F1	25	98609	pachytene	2	2	0
(DX66-69 x PWD)F1	26	98609	pachytene	2	2	0
(DX66-69 x PWD)F1	27	98609	pachytene	0	0	0
(DX66-69 x PWD)F1	28	98609	pachytene	1	1	0
(DX66-69 x PWD)F1	29	98609	pachytene	3	3	0
(DX66-69 x PWD)F1	30	98609	pachytene	2	1	1
(DX66-69 x PWD)F1	31	98609	pachytene	3	3	0
(DX66-69 x PWD)F1	32	98609	pachytene	1	1	0
(DX66-69 x PWD)F1	33	98609	pachytene	1	1	0
(DX66-69 x PWD)F1	34	98609	pachytene	1	1	0
(DX66-69 x PWD)F1	35	98609	pachytene	0	0	0
(DX66-69 x PWD)F1	36	98609	pachytene	1	0	1
(DX66-69 x PWD)F1	37	98609	pachytene	0	0	0
(DX66-69 x PWD)F1	38	98609	pachytene	0	0	0
(DX66-69 x PWD)F1	39	98609	pachytene	1	1	0
(DX66-69 x PWD)F1	40	98609	pachytene	0	0	0
(DX66-69 x PWD)F1	41	98609	pachytene	1	1	0
(DX66-69 x PWD)F1	42	98609	pachytene	1	1	0
(DX66-69 x PWD)F1	43	98609	pachytene	0	0	0
(DX66-69 x PWD)F1	44	98609	pachytene	0	0	0
(DX66-69 x PWD)F1	45	98609	pachytene	0	0	0
(DX66-69 x PWD)F1	46	98609	pachytene	1	1	0
(DX66-69 x PWD)F1	47	98609	pachytene	0	0	0
(DX66-69 x PWD)F1	48	98609	pachytene	1	1	0
(DX66-69 x PWD)F1	49	98609	pachytene	2	2	0
(DX66-69 x PWD)F1	50	98609	pachytene	1	0	1
(DX66-69 x PWD)F1	51	98609	pachytene	1	1	0
(DX66-69 x PWD)F1	52	98609	pachytene	1	1	0
(DX66-69 x PWD)F1	53	98609	pachytene	0	0	0
(DX66-69 x PWD)F1	54	98609	pachytene	1	1	0
(DX66-69 x PWD)F1	55	98609	pachytene	0	0	0
(DX66-69 x PWD)F1	56	98609	pachytene	1	1	0
(DX66-69 x PWD)F1	57	98609	pachytene	1	1	0
(DX66-69 x PWD)F1	58	98609	pachytene	0	0	0
(DX66-69 x PWD)F1	59	98609	pachytene	0	0	0
(DX66-69 x PWD)F1	60	98609	pachytene	1	1	0
(DX66-69 x PWD)F1	61	98609	pachytene	1	0	1
(DX66-69 x PWD)F1	62	98609	pachytene	1	1	0
(DX66-69 x PWD)F1	63	98609	pachytene	1	1	0
(DX66-69 x PWD)F1	64	98609	pachytene	0	0	0
(DX66-69 x PWD)F1	65	98609	pachytene	1	1	0
(DX66-69 x PWD)F1	66	98609	pachytene	1	1	0
(DX66-69 x PWD)F1	67	98609	pachytene	0	0	0
(DX66-69 x PWD)F1	68	98609	pachytene	1	0	1
(DX66-69 x PWD)F1	69	98609	pachytene	2	2	0
(DX66-69 x PWD)F1	70	98609	pachytene	1	1	0
(DX66-69 x PWD)F1	71	98609	pachytene	4	2	2
(DX66-69 x PWD)F1	72	98609	pachytene	0	0	0
(DX66-69 x PWD)F1	73	98609	pachytene	1	1	0

## Sheet: S4.4_Figure 4 - MLH1
S4.4 Data source for Figure 4
strain	mouse_id	obs_id	nr_MLH1_spots	nr_bivalents_wo_MLH1
B6	81446	1	21	0
B6	81446	2	21	0				LEGEND:
B6	81446	3	25	0				strain - name of the strain
B6	81446	4	27	0				mouse_id - mouse identification number from PyRAT system
B6	81446	5	30	0				obs_id - counted cell number
B6	81446	6	26	0				nr_MLH1_spots - number of MLH1 spots on autosomes
B6	81446	7	23	0				nr_bivalents_wo_MLH1 - number of bivalents without MLH1 spot
B6	81446	8	22	0
B6	81446	9	26	0
B6	81446	10	24	0
B6	81446	11	27	0
B6	81446	12	26	0
B6	81446	13	25	0
B6	81446	14	24	0
B6	81446	15	25	0
B6	81446	16	26	0
B6	81446	17	19	0
B6	81446	18	22	0
B6	81446	19	21	0
B6	81446	20	25	0
B6	81446	21	26	0
B6	81446	22	25	0
B6	81446	23	26	0
B6	81446	24	26	0
B6	81446	25	23	0
B6	81446	26	22	0
B6	81446	27	26	0
B6	81446	28	25	0
B6	81446	29	23	0
B6	81446	30	23	0
B6	81446	31	23	0
B6	81446	32	24	0
B6	81446	33	26	0
B6	81446	34	22	0
B6	81446	35	27	0
B6	81446	36	23	0
B6	81446	37	22	0
B6	81446	38	25	0
B6	81446	39	26	0
B6	85436	1	20	0
B6	85436	2	25	2
B6	85436	3	25	0
B6	85436	4	23	0
B6	85436	5	21	0
B6	85436	6	24	0
B6	85436	7	23	1
B6	85436	8	23	0
B6	85436	9	21	0
B6	85436	10	24	0
B6	85436	11	21	0
B6	85436	12	25	0
B6	85436	13	19	0
B6	85436	14	24	0
B6	85436	15	26	0
B6	85436	16	25	1
B6	85436	17	22	0
B6	85436	18	23	0
B6	85436	19	23	0
B6	85436	20	26	0
B6	85436	21	27	0
B6	85436	22	23	0
B6	85436	23	23	1
B6	85436	24	26	0
B6	85436	25	25	0
B6	85436	26	21	0
B6	85436	27	25	0
B6	85436	28	25	0
B6	85436	29	21	0
B6	85436	30	25	0
B6	85437	1	27	0
B6	85437	2	27	0
B6	85437	3	25	0
B6	85437	4	25	0
B6	85437	5	28	0
B6	85437	6	20	0
B6	85437	7	25	0
B6	85437	8	25	0
B6	85437	9	26	0
B6	85437	10	26	0
B6	85437	11	25	0
B6	85437	12	23	0
B6	85437	13	20	0
B6	85437	14	22	0
B6	85437	15	22	0
B6	85437	16	23	0
B6	85437	17	27	0
B6	85437	18	26	0
B6	85437	19	22	0
B6	85437	20	28	0
B6	85437	21	20	0
B6	85437	22	22	0
B6	85437	23	24	0
B6	85437	24	22	1
B6	85437	25	21	0
B6	85437	26	23	0
B6	85437	27	28	0
B6	85437	28	27	0
B6	85437	29	24	0
B6	85437	30	23	0
B6	85437	31	24	0
B6	85437	32	26	0
B6	85437	33	22	0
B6	85437	34	26	0
B6	85437	35	22	0
B6	85437	36	19	2
B6	85437	37	25	0
B6	85437	38	23	0
B6	85437	39	25	0
B6	85437	40	23	0
B6	85437	41	25	0
B6	85437	42	22	0
B6	85438	1	26	0
B6	85438	2	23	0
B6	85438	3	26	0
B6	85438	4	25	0
B6	85438	5	26	0
B6	85438	6	21	0
B6	85438	7	21	0
B6	85438	8	24	0
B6	85438	9	24	0
B6	85438	10	21	0
B6	85438	11	23	0
B6	85438	12	24	0
B6	85438	13	22	0
B6	85438	14	26	0
B6	85438	15	24	0
B6	85438	16	22	1
B6	85438	17	23	0
B6	85438	18	27	0
B6	85438	19	22	0
B6	85438	20	28	0
B6	85438	21	25	0
B6	85438	22	23	0
B6	85438	23	23	0
B6	85438	24	19	1
B6	85438	25	19	0
B6	85438	26	27	0
B6	85438	27	21	0
B6	85438	28	21	0
B6	85438	29	26	0
B6	85438	30	26	0
B6	85438	31	23	1
B6	85438	32	23	0
B6	85438	33	24	0
B6	85438	34	27	0
B6	85438	35	22	0
B6	85438	36	21	0
B6	85438	37	27	0
B6	85438	38	24	0
B6	85438	39	25	0
B6	85438	40	24	0
B6	85438	41	21	0
B6	85438	42	23	0
B6	85438	43	23	0
B6	85438	44	22	0
B6	85438	45	28	0
B6	85438	46	22	0
B6	85438	47	21	0
B6	85438	48	20	0
B6	85438	49	23	0
B6	85438	50	24	0
B6	84848	1	27	0
B6	84848	2	28	0
B6	84848	3	28	0
B6	84848	4	23	0
B6	84848	5	23	0
B6	84848	6	21	0
B6	84848	7	26	0
B6	84848	8	26	0
B6	84848	9	21	0
B6	84848	10	23	0
B6	84848	11	23	0
B6	84848	12	22	0
B6	84848	13	25	0
B6	84848	14	21	0
B6	84848	15	22	1
B6	84848	16	24	0
B6	84848	17	21	0
B6	84848	18	24	0
B6	84848	19	26	0
B6	84848	20	24	0
B6	84848	21	24	0
B6	84848	22	26	0
B6	84848	23	22	1
B6	84848	24	24	0
B6	84848	25	24	0
B6	84848	26	20	0
B6	84848	27	22	0
B6	84848	28	25	0
B6	84848	29	25	0
B6	84848	30	28	0
B6	84848	31	24	0
B6	84848	32	25	0
B6	84848	33	27	0
B6	84848	34	32	1
B6	84848	35	19	0
B6	84848	36	21	0
B6	84848	37	29	0
B6	84848	38	24	0
B6	84848	39	23	0
B6	84848	40	24	0
B6	84848	41	23	0
B6	84848	42	23	0
B6	84848	43	24	0
DX1	94782	1	19	1
DX1	94782	2	20	0
DX1	94782	3	26	0
DX1	94782	4	22	0
DX1	94782	5	21	0
DX1	94782	6	23	0
DX1	94782	7	29	0
DX1	94782	8	23	3
DX1	94782	9	22	0
DX1	94782	10	22	0
DX1	94782	11	25	0
DX1	94782	12	24	0
DX1	94782	13	21	1
DX1	94782	14	24	0
DX1	94782	15	21	0
DX1	94782	16	21	1
DX1	94782	17	27	0
DX1	94782	18	22	0
DX1	94782	19	23	0
DX1	94782	20	21	0
DX1	94782	21	22	0
DX1	94782	22	20	1
DX1	94782	23	22	0
DX1	94782	24	22	0
DX1	94782	25	21	0
DX1	94782	26	19	1
DX1	94782	27	24	0
DX1	94782	28	22	0
DX1	94782	29	24	0
DX1	94782	30	26	0
DX1	94782	31	23	0
DX1	94782	32	24	0
DX1	94782	33	30	0
DX1	94782	34	19	0
DX1	94782	35	21	0
DX1	94782	36	19	0
DX1	94782	37	23	1
DX1	94782	38	24	0
DX1	94782	39	24	0
DX1	94782	40	24	0
DX1	94782	41	24	0
DX1	94782	42	22	0
DX1	94782	43	22	0
DX1	94782	44	26	0
DX1	94782	45	24	0
DX1	94782	46	23	0
DX1	94782	47	21	1
DX1	94782	48	22	0
DX1	94782	49	22	0
DX1	94782	50	24	0
DX1	94782	51	22	0
DX1	94782	52	27	0
DX1	94782	53	24	0
DX1	94782	54	25	0
DX1	94782	55	25	0
DX1	94783	1	23	0
DX1	94783	2	25	0
DX1	94783	3	27	0
DX1	94783	4	22	0
DX1	94783	5	25	0
DX1	94783	6	20	1
DX1	94783	7	22	0
DX1	94783	8	24	0
DX1	94783	9	23	0
DX1	94783	10	25	0
DX1	94783	11	23	0
DX1	94783	12	21	1
DX1	94783	13	20	3
DX1	94783	14	25	0
DX1	94783	15	23	1
DX1	94783	16	24	0
DX1	94783	17	23	0
DX1	94783	18	25	0
DX1	94783	19	24	0
DX1	94783	20	23	1
DX1	94783	21	25	0
DX1	94783	22	22	0
DX1	94783	23	22	0
DX1	94783	24	20	3
DX1	94783	25	23	0
DX1	94783	26	21	0
DX1	94783	27	23	0
DX1	94783	28	24	0
DX1	94783	29	25	0
DX1	94783	30	24	0
DX1	94783	31	22	0
DX1	94783	32	22	0
DX1	94783	33	22	0
DX1	94783	34	22	0
DX1	94783	35	26	0
DX1	94783	36	24	0
DX1	94783	37	24	0
DX1	94783	38	22	0
DX1	94783	39	22	0
DX1	94783	40	23	0
DX1	94783	41	27	0
DX1	94783	42	21	0
DX1	94783	43	24	0
DX1	94783	44	21	0
DX1	94783	45	27	0
DX1	94783	46	24	0
DX1	94783	47	25	0
DX1	94783	48	19	2
DX1	94783	49	26	0
DX1	94783	50	25	0
DX1	94783	51	20	0
DX1	94783	52	20	0
DX1	94783	53	23	0
DX1	94783	54	23	0
DX1	94783	55	20	0
DX1	94783	56	28	0
DX1	94783	57	21	1
DX1	94784	1	21	0
DX1	94784	2	25	0
DX1	94784	3	23	0
DX1	94784	4	20	0
DX1	94784	5	21	0
DX1	94784	6	18	3
DX1	94784	7	22	0
DX1	94784	8	25	0
DX1	94784	9	24	0
DX1	94784	10	25	0
DX1	94784	11	24	0
DX1	94784	12	22	0
DX1	94784	13	25	0
DX1	94784	14	21	0
DX1	94784	15	25	1
DX1	94784	16	21	0
DX1	94784	17	23	0
DX1	94784	18	23	0
DX1	94784	19	25	0
DX1	94784	20	22	0
DX1	94784	21	26	0
DX1	94784	22	23	0
DX1	94784	23	28	0
DX1	94784	24	26	0
DX1	94784	25	25	0
DX1	94784	26	20	1
DX1	94784	27	22	0
DX1	94784	28	24	0
DX1	94784	29	27	0
DX1	94784	30	22	0
DX1	94784	31	25	0
DX1	94784	32	27	0
DX1	94784	33	22	0
DX1	94784	34	20	3
DX1	94784	35	27	0
DX1	94784	36	24	0
DX1	94784	37	24	0
DX1	94784	38	22	0
DX1	94784	39	22	0
DX1	94784	40	21	1
DX1	94784	41	21	0
DX1	94784	42	23	0
DX1	94784	43	23	0
DX1	94784	44	22	0
DX1	94784	45	24	0
DX1	94784	46	24	0
DX1	94784	47	25	0
DX1	94784	48	22	0
DX1	94784	49	21	0
DX1	94784	50	27	0
DX1	94784	51	22	0
DX1	94784	52	22	0
DX1	94784	53	19	1
DX1	94784	54	25	0
DX1	94784	55	23	0
DX1	94784	56	23	0
DX1	94784	57	21	1
DX1	94784	58	23	1
DX1	94784	59	21	1
DX1	94784	60	21	0
DX1	94784	61	22	1
DX1	94784	62	21	0
DX1	94784	63	22	0
DX1	94784	64	22	1
DX1	94784	65	24	0
DX1	95224	1	21	1
DX1	95224	2	26	0
DX1	95224	3	20	0
DX1	95224	4	23	0
DX1	95224	5	21	0
DX1	95224	6	19	0
DX1	95224	7	20	1
DX1	95224	8	26	0
DX1	95224	9	21	0
DX1	95224	10	21	0
DX1	95224	11	23	0
DX1	95224	12	24	0
DX1	95224	13	22	0
DX1	95224	14	19	0
DX1	95224	15	25	0
DX1	95224	16	22	0
DX1	95224	17	23	0
DX1	95224	18	22	0
DX1	95224	19	22	0
DX1	95224	20	23	0
DX1	95224	21	23	0
DX1	95224	22	24	0
DX1	95224	23	21	1
DX1	95224	24	24	0
DX1	95224	25	27	0
DX1	95224	26	26	0
DX1	95224	27	25	0
DX1	95224	28	23	0
DX1	95224	29	23	0
DX1	95224	30	23	0
DX1	95224	31	22	0
DX1	95224	32	24	0
DX1	95224	33	24	0
DX1	95224	34	24	0
DX1	95224	35	24	0
DX1	95224	36	21	2
DX1	95224	37	29	0
DX1	95224	38	21	0
DX1	95224	39	25	0
DX1	95224	40	23	0
DX1	95224	41	22	1
DX1	95224	42	22	0
DX1	95224	43	23	0
DX1	95224	44	26	0
DX1	95224	45	26	0
DX1	95224	46	22	0
DX1	95224	47	21	0
DX1	95224	48	26	0
DX1	95224	49	21	0
DX1	95224	50	22	0
DX1	95224	51	28	0
DX1	95224	52	25	0
DX1	95224	53	21	0
DX1	95224	54	19	0
DX1	95224	55	22	0
DX1	95224	56	20	1
DX1	95224	57	23	0
DX1	95224	58	25	0
DX1	95224	59	22	0
DX1	95224	60	20	0
DX1	95224	61	23	0
DX1	95225	1	20	0
DX1	95225	2	23	0
DX1	95225	3	25	0
DX1	95225	4	23	0
DX1	95225	5	23	0
DX1	95225	6	21	0
DX1	95225	7	23	0
DX1	95225	8	23	0
DX1	95225	9	25	1
DX1	95225	10	23	0
DX1	95225	11	23	0
DX1	95225	12	23	0
DX1	95225	13	21	1
DX1	95225	14	22	0
DX1	95225	15	26	0
DX1	95225	16	23	0
DX1	95225	17	21	1
DX1	95225	18	27	0
DX1	95225	19	26	0
DX1	95225	20	23	0
DX1	95225	21	21	0
DX1	95225	22	20	1
DX1	95225	23	19	2
DX1	95225	24	20	0
DX1	95225	25	27	0
DX1	95225	26	22	0
DX1	95225	27	18	3
DX1	95225	28	22	1
DX1	95225	29	25	0
DX1	95225	30	21	0
DX1	95225	31	25	0
DX1	95225	32	25	0
DX1	95225	33	22	0
DX1	95225	34	21	1
DX1	95225	35	22	0
DX1	95225	36	27	0
DX1	95225	37	23	0
DX1	95225	38	27	0
DX1	95225	39	22	0
DX1	95225	40	26	0
DX1	95225	41	21	0
DX1	95225	42	20	0
DX1	95225	43	23	0
DX1	95225	44	22	0
DX1	95225	45	22	0
DX1	95225	46	20	0
DX1	95225	47	24	0
DX1	95225	48	23	0
DX1	95225	49	21	0
DX1	95225	50	23	0
DX1	95225	51	19	1
DX1	95225	52	25	0
DX1	95225	53	22	0
DX1	95225	54	23	0
DX1	95225	55	22	0
DX1s	79073	1	20	1
DX1s	79073	2	21	1
DX1s	79073	3	22	0
DX1s	79073	4	20	0
DX1s	79073	5	24	0
DX1s	79073	6	18	1
DX1s	79073	7	20	0
DX1s	79073	8	23	0
DX1s	79073	9	21	1
DX1s	79073	10	20	2
DX1s	79073	11	21	0
DX1s	79073	12	18	1
DX1s	79073	13	23	0
DX1s	79073	14	18	3
DX1s	79073	15	23	0
DX1s	79073	16	19	0
DX1s	79073	17	24	0
DX1s	79073	18	19	1
DX1s	79073	19	18	1
DX1s	79073	20	24	0
DX1s	79073	21	19	0
DX1s	79073	22	22	0
DX1s	79073	23	20	1
DX1s	79073	24	25	0
DX1s	79073	25	22	0
DX1s	79073	26	20	0
DX1s	79073	27	17	2
DX1s	79073	28	20	0
DX1s	79073	29	22	1
DX1s	79073	30	21	1
DX1s	79073	31	25	0
DX1s	79073	32	21	2
DX1s	79073	33	19	2
DX1s	79073	34	25	0
DX1s	79073	35	20	0
DX1s	79073	36	18	2
DX1s	79073	37	21	0
DX1s	79073	38	22	0
DX1s	79073	39	28	0
DX1s	79073	40	21	1
DX1s	79073	41	23	0
DX1s	79073	42	21	0
DX1s	79648	1	22	0
DX1s	79648	2	21	0
DX1s	79648	3	20	1
DX1s	79648	4	27	0
DX1s	79648	5	21	0
DX1s	79648	6	21	0
DX1s	79648	7	17	1
DX1s	79648	8	19	2
DX1s	79648	9	23	0
DX1s	79648	10	25	0
DX1s	79648	11	21	1
DX1s	79648	12	20	0
DX1s	79648	13	24	0
DX1s	79648	14	23	0
DX1s	79648	15	19	3
DX1s	79648	16	23	0
DX1s	79648	17	20	0
DX1s	79648	18	21	0
DX1s	79648	19	21	0
DX1s	79648	20	19	2
DX1s	79648	21	20	1
DX1s	79648	22	21	1
DX1s	79648	23	23	0
DX1s	79648	24	21	1
DX1s	79648	25	22	0
DX1s	79648	26	20	3
DX1s	79648	27	19	0
DX1s	79648	28	21	1
DX1s	79648	29	20	0
DX1s	79648	30	20	1
DX1s	79648	31	19	2
DX1s	79648	32	23	0
DX1s	79648	33	20	0
DX1s	79648	34	23	0
DX1s	79648	35	17	3
DX1s	79648	36	23	0
DX1s	79648	37	22	0
DX1s	79648	38	19	1
DX1s	79648	39	19	1
DX1s	79648	40	23	0
DX1s	79648	41	21	1
DX1s	79648	42	19	2
DX1s	79648	43	22	2
DX1s	79648	44	19	1
DX1s	79648	45	21	0
DX1s	80504	1	17	4
DX1s	80504	2	21	0
DX1s	80504	3	19	1
DX1s	80504	4	20	2
DX1s	80504	5	21	1
DX1s	80504	6	17	3
DX1s	80504	7	23	0
DX1s	80504	8	20	2
DX1s	80504	9	19	2
DX1s	80504	10	22	0
DX1s	80504	11	19	1
DX1s	80504	12	20	1
DX1s	80504	13	21	0
DX1s	80504	14	19	0
DX1s	80504	15	19	0
DX1s	80504	16	20	1
DX1s	80504	17	20	1
DX1s	80504	18	19	1
DX1s	80504	19	19	3
DX1s	80504	20	19	1
DX1s	80504	21	19	1
DX1s	80504	22	22	0
DX1s	80504	23	20	1
DX1s	80504	24	23	0
DX1s	80504	25	19	1
DX1s	80504	26	19	2
DX1s	80504	27	22	0
DX1s	80504	28	20	1
DX1s	80504	29	21	1
DX1s	80504	30	20	0
DX1s	80504	31	19	1
DX1s	80504	32	19	1
DX1s	80504	33	22	0
DX1s	80504	34	22	0
DX1s	80504	35	21	0
DX1s	80504	36	17	4
DX1s	80504	37	20	1
DX1s	80504	38	19	0
DX1s	80504	39	23	0
DX1s	80504	40	22	0
DX1s	80504	41	19	0
DX1s	80504	42	22	1
DX1s	80504	43	21	1
DX1s	80504	44	21	0
DX1s	80504	45	20	1
DX1s	80504	46	20	2
DX1s	80504	47	21	0
DX1s	80504	48	17	0
DX1s	80505	1	21	0
DX1s	80505	2	21	2
DX1s	80505	3	21	1
DX1s	80505	4	23	0
DX1s	80505	5	23	1
DX1s	80505	6	22	1
DX1s	80505	7	19	0
DX1s	80505	8	18	1
DX1s	80505	9	18	2
DX1s	80505	10	20	0
DX1s	80505	11	17	2
DX1s	80505	12	23	0
DX1s	80505	13	22	1
DX1s	80505	14	23	0
DX1s	80505	15	20	0
DX1s	80505	16	22	0
DX1s	80505	17	18	1
DX1s	80505	18	19	2
DX1s	80505	19	22	1
DX1s	80505	20	16	3
DX1s	80505	21	20	3
DX1s	80505	22	17	3
DX1s	80505	23	18	2
DX1s	80505	24	18	2
DX1s	80505	25	20	0
DX1s	80505	26	21	0
DX1s	80505	27	24	0
DX1s	80505	28	20	0
DX1s	80505	29	17	3
DX1s	80505	30	19	3
DX1s	80505	31	19	3
DX1s	80505	32	22	0
DX1s	80505	33	18	0
DX1s	80505	34	22	0
DX1s	80505	35	20	2
DX1s	80505	36	20	0
DX1s	80505	37	20	0
DX1s	80505	38	21	1
DX1s	80505	39	19	1
DX1s	80505	40	21	0
DX1s	80505	41	23	0
DX1s	80506	1	22	0
DX1s	80506	2	21	0
DX1s	80506	3	18	1
DX1s	80506	4	20	1
DX1s	80506	5	27	0
DX1s	80506	6	23	1
DX1s	80506	7	19	0
DX1s	80506	8	24	0
DX1s	80506	9	27	0
DX1s	80506	10	23	0
DX1s	80506	11	23	0
DX1s	80506	12	19	2
DX1s	80506	13	22	0
DX1s	80506	14	23	1
DX1s	80506	15	19	1
DX1s	80506	16	22	0
DX1s	80506	17	21	0
DX1s	80506	18	20	1
DX1s	80506	19	21	1
DX1s	80506	20	24	1
DX1s	80506	21	21	1
DX1s	80506	22	21	1
DX1s	80506	23	21	0
DX1s	80506	24	20	0
DX1s	80506	25	22	0
DX1s	80506	26	21	0
DX1s	80506	27	21	0
DX1s	80506	28	19	2
DX1s	80506	29	19	1
DX1s	80506	30	21	0
DX1s	80506	31	21	0
DX1s	80506	32	21	2
DX1s	80506	33	22	0
DX1s	80506	34	21	1
DX1s	80506	35	19	1
DX1s	80506	36	19	1
DX1s	80506	37	18	2
DX1s	80506	38	18	2
DX1s	80506	39	20	0
DX1s	80506	40	18	2
DX1s	80506	41	18	3
DX1s	80506	42	20	0
DX1s	80506	43	19	1
DX1s	80506	44	20	0
DX1s	80506	45	20	0
DX1s	80506	46	20	1
DX64-69	99314	1	19	1
DX64-69	99314	2	21	2
DX64-69	99314	3	24	0
DX64-69	99314	4	22	0
DX64-69	99314	5	25	1
DX64-69	99314	6	22	0
DX64-69	99314	7	25	0
DX64-69	99314	8	20	0
DX64-69	99314	9	25	0
DX64-69	99314	10	21	0
DX64-69	99314	11	19	1
DX64-69	99314	12	23	1
DX64-69	99314	13	22	1
DX64-69	99314	14	20	0
DX64-69	99314	15	22	1
DX64-69	99314	16	25	0
DX64-69	99314	17	22	0
DX64-69	99314	18	25	0
DX64-69	99314	19	20	0
DX64-69	99314	20	26	0
DX64-69	99314	21	25	0
DX64-69	99314	22	22	0
DX64-69	99314	23	20	0
DX64-69	99314	24	23	0
DX64-69	99314	25	20	0
DX64-69	99314	26	20	0
DX64-69	99314	27	21	1
DX64-69	99314	28	23	0
DX64-69	99314	29	22	0
DX64-69	99314	30	20	1
DX64-69	99314	31	19	2
DX64-69	99314	32	21	0
DX64-69	99314	33	19	0
DX64-69	99314	34	23	0
DX64-69	99314	35	20	0
DX64-69	99314	36	24	1
DX64-69	99314	37	24	0
DX64-69	99314	38	20	0
DX64-69	99314	39	23	0
DX64-69	99314	40	20	2
DX64-69	99314	41	25	0
DX64-69	99314	42	23	0
DX64-69	99315	1	23	1
DX64-69	99315	2	24	0
DX64-69	99315	3	18	1
DX64-69	99315	4	26	1
DX64-69	99315	5	21	0
DX64-69	99315	6	19	0
DX64-69	99315	7	23	0
DX64-69	99315	8	20	0
DX64-69	99315	9	21	0
DX64-69	99315	10	22	1
DX64-69	99315	11	19	0
DX64-69	99315	12	23	0
DX64-69	99315	13	25	0
DX64-69	99315	14	23	0
DX64-69	99315	15	21	0
DX64-69	99315	16	22	0
DX64-69	99315	17	24	0
DX64-69	99315	18	23	1
DX64-69	99315	19	23	0
DX64-69	99315	20	21	0
DX64-69	99315	21	20	1
DX64-69	99315	22	25	0
DX64-69	99315	23	25	0
DX64-69	99315	24	22	0
DX64-69	99315	25	22	0
DX64-69	99315	26	23	0
DX64-69	99315	27	21	0
DX64-69	99315	28	18	2
DX64-69	99315	29	26	0
DX64-69	99315	30	23	0
DX64-69	99315	31	20	2
DX64-69	99315	32	22	0
DX64-69	99315	33	22	0
DX64-69	99315	34	21	0
DX64-69	99315	35	24	0
DX64-69	99315	36	20	0
DX64-69	99315	37	23	0
DX64-69	99315	38	23	0
DX64-69	99315	39	23	0
DX64-69	99315	40	24	0
DX64-69	99315	41	20	0
DX64-69	99315	42	18	1
DX64-69	99315	43	21	1
DX64-69	99315	44	26	1
DX64-69	99315	45	18	3
DX64-69	99315	46	21	0
DX64-69	99315	47	22	0
DX64-69	99316	1	23	0
DX64-69	99316	2	21	0
DX64-69	99316	3	22	0
DX64-69	99316	4	20	1
DX64-69	99316	5	22	0
DX64-69	99316	6	24	1
DX64-69	99316	7	24	0
DX64-69	99316	8	22	0
DX64-69	99316	9	19	0
DX64-69	99316	10	24	0
DX64-69	99316	11	20	1
DX64-69	99316	12	21	0
DX64-69	99316	13	23	0
DX64-69	99316	14	22	1
DX64-69	99316	15	22	0
DX64-69	99316	16	20	0
DX64-69	99316	17	22	0
DX64-69	99316	18	20	2
DX64-69	99316	19	21	0
DX64-69	99316	20	23	0
DX64-69	99316	21	24	0
DX64-69	99316	22	19	2
DX64-69	99316	23	18	2
DX64-69	99316	24	20	1
DX64-69	99316	25	18	3
DX64-69	99316	26	24	0
DX64-69	99316	27	21	0
DX64-69	99316	28	20	2
DX64-69	99316	29	21	0
DX64-69	99316	30	20	1
DX64-69	99316	31	26	0
DX64-69	99316	32	20	0
DX64-69	99316	33	23	0
DX64-69	99316	34	20	0
DX64-69	99316	35	20	1
DX64-69	99316	36	20	3
DX64-69	99316	37	23	0
DX64-69	99316	38	21	0
DX64-69	99316	39	21	0
DX64-69	99316	40	21	0
DX64-69	99317	1	23	0
DX64-69	99317	2	24	1
DX64-69	99317	3	21	0
DX64-69	99317	4	23	0
DX64-69	99317	5	22	0
DX64-69	99317	6	25	0
DX64-69	99317	7	24	0
DX64-69	99317	8	22	0
DX64-69	99317	9	22	0
DX64-69	99317	10	20	0
DX64-69	99317	11	21	0
DX64-69	99317	12	20	1
DX64-69	99317	13	18	1
DX64-69	99317	14	21	0
DX64-69	99317	15	22	0
DX64-69	99317	16	20	0
DX64-69	99317	17	23	0
DX64-69	99317	18	20	1
DX64-69	99317	19	24	1
DX64-69	99317	20	24	0
DX64-69	99317	21	24	0
DX64-69	99317	22	21	0
DX64-69	99317	23	21	1
DX64-69	99317	24	23	0
DX64-69	99317	25	25	0
DX64-69	99317	26	23	0
DX64-69	99317	27	23	0
DX64-69	99317	28	20	1
DX64-69	99317	29	22	1
DX64-69	99317	30	26	0
DX64-69	99317	31	23	0
DX64-69	99856	1	22	1
DX64-69	99856	2	18	4
DX64-69	99856	3	20	3
DX64-69	99856	4	26	0
DX64-69	99856	5	24	0
DX64-69	99856	6	23	2
DX64-69	99856	7	19	0
DX64-69	99856	8	24	0
DX64-69	99856	9	23	0
DX64-69	99856	10	24	0
DX64-69	99856	11	22	0
DX64-69	99856	12	22	0
DX64-69	99856	13	20	1
DX64-69	99856	14	28	0
DX64-69	99856	15	25	0
DX64-69	99856	16	23	0
DX64-69	99856	17	22	0
DX64-69	99856	18	25	0
DX64-69	99856	19	18	2
DX64-69	99856	20	25	0
DX64-69	99856	21	21	0
DX64-69	99856	22	26	0
DX64-69	99856	23	26	0
DX64-69	99856	24	25	0
DX64-69	99856	25	21	0
DX64-69	99856	26	20	0
DX64-69	99856	27	23	0
DX64-69	99856	28	24	0
DX64-69	99856	29	17	2
DX64-69	99856	30	23	1
DX64-69	99856	31	20	0
DX64-69	99856	32	22	0
DX64-69	99856	33	22	1
DX64-69	99856	34	22	0
DX64-69	99856	35	25	0
DX64-69	99856	36	24	1
DX64-69	99856	37	22	0
DX64-69	99856	38	21	3
DX64-69	99856	39	18	3
DX64-69	99856	40	27	0
DX64-69	99856	41	22	2
DX64-69	99856	42	23	0
DX64-69	99856	43	21	1
DX66-69	e1725	1	23	0
DX66-69	e1725	2	20	0
DX66-69	e1725	3	25	0
DX66-69	e1725	4	25	1
DX66-69	e1725	5	21	0
DX66-69	e1725	6	25	0
DX66-69	e1725	7	26	0
DX66-69	e1725	8	21	1
DX66-69	e1725	9	20	1
DX66-69	e1725	10	25	0
DX66-69	e1725	11	20	0
DX66-69	e1725	12	24	0
DX66-69	e1725	13	25	0
DX66-69	e1725	14	23	0
DX66-69	e1725	15	21	0
DX66-69	e1725	16	25	0
DX66-69	e1725	17	23	1
DX66-69	e1725	18	22	0
DX66-69	e1725	19	25	1
DX66-69	e1725	20	23	0
DX66-69	e1725	21	19	0
DX66-69	e1725	22	22	0
DX66-69	e1725	23	21	0
DX66-69	e1725	24	24	0
DX66-69	e1725	25	22	1
DX66-69	e1725	26	22	0
DX66-69	e1725	27	21	0
DX66-69	e1725	28	21	1
DX66-69	e1725	29	19	0
DX66-69	e1725	30	20	0
DX66-69	e1725	31	20	0
DX66-69	e1725	32	20	0
DX66-69	e1725	33	20	2
DX66-69	e1725	34	20	0
DX66-69	e1725	35	21	0
DX66-69	e1725	36	21	0
DX66-69	e1725	37	20	0
DX66-69	e1725	38	21	1
DX66-69	e1725	39	23	0
DX66-69	e1725	40	22	0
DX66-69	e1725	41	20	1
DX66-69	e1725	42	22	0
DX66-69	e1725	43	22	0
DX66-69	e1725	44	26	0
DX66-69	e1725	45	22	0
DX66-69	e1725	46	24	0
DX66-69	e1725	47	20	0
DX66-69	e1725	48	22	0
DX66-69	e1725	49	20	0
DX66-69	e1725	50	21	0
DX66-69	e1725	51	22	0
DX66-69	e1725	52	20	0
DX66-69	e1725	53	24	0
DX66-69	e1725	54	21	0
DX66-69	e1725	55	25	0
DX66-69	e1725	56	26	0
DX66-69	e4990	1	22	0
DX66-69	e4990	2	22	1
DX66-69	e4990	3	23	1
DX66-69	e4990	4	28	0
DX66-69	e4990	5	24	0
DX66-69	e4990	6	26	0
DX66-69	e4990	7	21	0
DX66-69	e4990	8	22	0
DX66-69	e4990	9	22	0
DX66-69	e4990	10	22	0
DX66-69	e4990	11	24	0
DX66-69	e4990	12	22	0
DX66-69	e4990	13	23	0
DX66-69	e4990	14	19	2
DX66-69	e4990	15	23	0
DX66-69	e4990	16	27	0
DX66-69	e4990	17	25	0
DX66-69	e4990	18	20	0
DX66-69	e4990	19	22	0
DX66-69	e4990	20	21	0
DX66-69	e4990	21	23	0
DX66-69	e4990	22	24	0
DX66-69	e4990	23	24	0
DX66-69	e4990	24	20	1
DX66-69	e4990	25	16	3
DX66-69	e4990	26	22	0
DX66-69	e4990	27	21	0
DX66-69	e4990	28	19	0
DX66-69	e4990	29	24	0
DX66-69	e4990	30	24	0
DX66-69	e4990	31	21	0
DX66-69	e4990	32	20	0
DX66-69	e4990	33	21	1
DX66-69	e4990	34	19	0
DX66-69	e4990	35	23	0
DX66-69	e4990	36	20	3
DX66-69	e4990	37	21	0
DX66-69	e4990	38	25	0
DX66-69	e4990	39	21	0
DX66-69	e4990	40	23	0
DX66-69	e4990	41	24	0
DX66-69	e4990	42	25	0
DX66-69	e4990	43	24	0
DX66-69	e4990	44	23	0
DX66-69	e4990	45	21	0
DX66-69	e4990	46	21	0
DX66-69	e4990	47	23	1
DX66-69	e4990	48	22	0
DX66-69	e4990	49	19	0
DX66-69	e4990	50	23	0
DX66-69	e4990	51	21	0
DX66-69	e4990	52	21	0
DX66-69	e4990	53	21	0
DX66-69	e4990	54	25	0
DX66-69	e4991	1	22	0
DX66-69	e4991	2	21	0
DX66-69	e4991	3	19	0
DX66-69	e4991	4	23	0
DX66-69	e4991	5	25	0
DX66-69	e4991	6	20	0
DX66-69	e4991	7	24	0
DX66-69	e4991	8	23	0
DX66-69	e4991	9	22	1
DX66-69	e4991	10	21	0
DX66-69	e4991	11	22	0
DX66-69	e4991	12	21	0
DX66-69	e4991	13	21	2
DX66-69	e4991	14	22	1
DX66-69	e4991	15	20	2
DX66-69	e4991	16	20	0
DX66-69	e4991	17	21	0
DX66-69	e4991	18	22	0
DX66-69	e4991	19	23	0
DX66-69	e4991	20	17	2
DX66-69	e4991	21	24	0
DX66-69	e4991	22	22	0
DX66-69	e4991	23	20	0
DX66-69	e4991	24	22	0
DX66-69	e4991	25	26	0
DX66-69	e4991	26	25	0
DX66-69	e4991	27	24	0
DX66-69	e4991	28	22	0
DX66-69	e4991	29	23	0
DX66-69	e4991	30	24	0
DX66-69	e4991	31	25	0
DX66-69	e4991	32	23	0
DX66-69	e4991	33	25	0
DX66-69	e4991	34	19	1
DX66-69	e4991	35	19	1
DX66-69	e4991	36	20	1
DX66-69	e4991	37	23	0
DX66-69	e4991	38	21	0
DX66-69	e4991	39	23	0
DX66-69	e4991	40	25	0
DX66-69	e4991	41	23	0
DX66-69	e4991	42	22	0
DX66-69	e4991	43	22	0
DX66-69	e4991	44	24	0
DX66-69	e4991	45	20	0
DX66-69	e4991	46	24	0
DX66-69	e4991	47	21	0
DX66-69	e4991	48	24	0
DX66-69	e4991	49	21	0
DX66-69	e4991	50	24	0
DX66-69	e4991	51	23	0
DX66-69	e4991	52	21	0
DX66-69	e4991	53	25	0
DX66-69	e4992	1	24	0
DX66-69	e4992	2	23	0
DX66-69	e4992	3	22	1
DX66-69	e4992	4	21	0
DX66-69	e4992	5	23	0
DX66-69	e4992	6	23	0
DX66-69	e4992	7	26	0
DX66-69	e4992	8	21	0
DX66-69	e4992	9	22	0
DX66-69	e4992	10	26	0
DX66-69	e4992	11	21	0
DX66-69	e4992	12	26	0
DX66-69	e4992	13	19	2
DX66-69	e4992	14	23	0
DX66-69	e4992	15	20	1
DX66-69	e4992	16	20	0
DX66-69	e4992	17	23	0
DX66-69	e4992	18	21	1
DX66-69	e4992	19	23	0
DX66-69	e4992	20	21	1
DX66-69	e4992	21	27	0
DX66-69	e4992	22	23	0
DX66-69	e4992	23	23	0
DX66-69	e4992	24	23	0
DX66-69	e4992	25	22	0
DX66-69	e4992	26	20	0
DX66-69	e4992	27	24	0
DX66-69	e4992	28	24	1
DX66-69	e4992	29	20	0
DX66-69	e4992	30	25	0
DX66-69	e4992	31	19	0
DX66-69	e4992	32	22	0
DX66-69	e4992	33	23	0
DX66-69	e4992	34	20	1
DX66-69	e4992	35	22	0
DX66-69	e4992	36	20	0
DX66-69	e4992	37	19	0
DX66-69	e4992	38	24	0
DX66-69	e4992	39	21	0
DX66-69	e4992	40	21	1
DX66-69	e4992	41	21	0
DX66-69	e4992	42	20	0
DX66-69	e4992	43	23	0
DX66-69	e4992	44	25	0
DX66-69	e4992	45	24	2
DX66-69	e4992	46	19	0
DX66-69	e4992	47	24	0
DX66-69	e4992	48	19	2
DX66-69	e4992	49	21	0
DX66-69	e4992	50	25	0
DX66-69	e4992	51	24	1
DX66-69	e4992	52	19	0
DX66-69	e4992	53	22	0
DX66-69	94842	1	20	0
DX66-69	94842	2	24	0
DX66-69	94842	3	25	0
DX66-69	94842	4	20	2
DX66-69	94842	5	24	0
DX66-69	94842	6	23	1
DX66-69	94842	7	25	0
DX66-69	94842	8	22	0
DX66-69	94842	9	23	0
DX66-69	94842	10	20	1
DX66-69	94842	11	25	0
DX66-69	94842	12	23	1
DX66-69	94842	13	22	0
DX66-69	94842	14	20	1
DX66-69	94842	15	22	0
DX66-69	94842	16	19	1
DX66-69	94842	17	21	0
DX66-69	94842	18	23	0
DX66-69	94842	19	20	0
DX66-69	94842	20	22	0
DX66-69	94842	21	25	0
DX66-69	94842	22	21	0
DX66-69	94842	23	23	0
DX66-69	94842	24	22	0
DX66-69	94842	25	22	0
DX66-69	94842	26	20	0
DX66-69	94842	27	19	1
DX66-69	94842	28	21	0
DX66-69	94842	29	26	0
DX66-69	94842	30	22	0
DX66-69	94842	31	19	1
DX66-69	94842	32	20	0
DX66-69	94842	33	18	1
DX66-69	94842	34	21	0
DX66-69	94842	35	21	0
DX66-69	94842	36	23	0
DX66-69	94842	37	21	0
DX66-69	94842	38	23	0
DX66-69	94842	39	23	0
DX66-69	94842	40	20	1
DX66-69	94842	41	21	0
DX66-69	94842	42	19	0
DX66-69	94842	43	25	0
DX66-69	94842	44	22	0
DX66-69	94842	45	24	0
DX66-69	94842	46	25	0
DX66-69	94842	47	21	0
DX66-69	94842	48	21	0
DX66-69	94842	49	22	0
DX66-69	94842	50	21	0
DX66-69	94842	51	20	0
DX66-69	94842	52	22	0
DX66-69	94842	53	22	0
DX66-69	94842	54	24	0
DX66-69	94842	55	20	0
DX66-69	94842	56	25	0
DX66-69	94842	57	23	0
DX66-69	94842	58	24	0
DX66-69	94842	59	23	0
DX66-69	94842	60	23	0
DX66-69	94842	61	21	0
DX66-69	94842	62	23	0
DX66-69	94842	63	21	2
DX66-69	94842	64	23	0
DX66-69	94842	65	21	0
DX66-69	94842	66	22	1
DX66-69	94842	67	24	0
DX66-69	94842	68	24	0

## Sheet: S4.5_Figure S6 - TUNEL
S4.5 Data source for Figure S6
obs_id	mouse_id	strain	testis_tubules_nr	nr_apoptotic_cells
1	80897	Fmr1nb-	1	1
2	80897	Fmr1nb-	2	6			LEGEND:
3	80897	Fmr1nb-	3	1			obs_id - counted cell number
4	80897	Fmr1nb-	4	2			mouse_id - mouse identification number from PyRAT system
5	80897	Fmr1nb-	5	0			strain - name of the strain
6	80897	Fmr1nb-	6	0			testis_tubules_nr - tubule number on picture
7	80897	Fmr1nb-	7	1			nr_apoptotic_cells - number of apoptotic cells in one tubule
8	80897	Fmr1nb-	8	4
9	80897	Fmr1nb-	9	3
10	80897	Fmr1nb-	10	1
11	80897	Fmr1nb-	1	0
12	80897	Fmr1nb-	2	1
13	80897	Fmr1nb-	3	0
14	80897	Fmr1nb-	4	1
15	80897	Fmr1nb-	5	6
16	80897	Fmr1nb-	6	9
17	80897	Fmr1nb-	7	0
18	80897	Fmr1nb-	1	3
19	80897	Fmr1nb-	2	0
20	80897	Fmr1nb-	3	0
21	80897	Fmr1nb-	4	7
22	80897	Fmr1nb-	5	5
23	80897	Fmr1nb-	1	2
24	80897	Fmr1nb-	2	3
25	80897	Fmr1nb-	3	5
26	80897	Fmr1nb-	1	1
27	80897	Fmr1nb-	2	19
28	80897	Fmr1nb-	3	5
29	80897	Fmr1nb-	4	3
30	80897	Fmr1nb-	5	0
31	80897	Fmr1nb-	6	11
32	80897	Fmr1nb-	1	10
33	80897	Fmr1nb-	2	5
34	80897	Fmr1nb-	3	0
35	80897	Fmr1nb-	4	2
36	80897	Fmr1nb-	5	3
37	80897	Fmr1nb-	6	1
38	80897	Fmr1nb-	7	0
39	80897	Fmr1nb-	1	11
40	80897	Fmr1nb-	2	0
41	80897	Fmr1nb-	3	1
42	80897	Fmr1nb-	4	4
43	80897	Fmr1nb-	5	7
44	80897	Fmr1nb-	6	6
45	80897	Fmr1nb-	7	4
46	80897	Fmr1nb-	8	6
47	80897	Fmr1nb-	9	0
48	80897	Fmr1nb-	1	2
49	80897	Fmr1nb-	2	3
50	80897	Fmr1nb-	3	9
51	80897	Fmr1nb-	4	4
52	80897	Fmr1nb-	5	3
53	80897	Fmr1nb-	1	0
54	80897	Fmr1nb-	2	0
55	80897	Fmr1nb-	3	8
56	80897	Fmr1nb-	4	1
57	80897	Fmr1nb-	5	4
58	80897	Fmr1nb-	6	0
59	80897	Fmr1nb-	7	1
60	80897	Fmr1nb-	1	0
61	80897	Fmr1nb-	2	6
62	80897	Fmr1nb-	3	1
63	80897	Fmr1nb-	4	0
64	80897	Fmr1nb-	5	1
65	80897	Fmr1nb-	6	1
66	80897	Fmr1nb-	1	1
67	80897	Fmr1nb-	2	2
68	80897	Fmr1nb-	3	3
69	80897	Fmr1nb-	4	3
70	80897	Fmr1nb-	5	10
71	80897	Fmr1nb-	6	3
72	80897	Fmr1nb-	7	9
73	80897	Fmr1nb-	8	3
74	80897	Fmr1nb-	9	2
75	80897	Fmr1nb-	10	3
76	80897	Fmr1nb-	11	0
77	80897	Fmr1nb-	12	9
78	80897	Fmr1nb-	1	3
79	80897	Fmr1nb-	2	4
80	80897	Fmr1nb-	3	15
81	80897	Fmr1nb-	4	3
82	80897	Fmr1nb-	5	10
83	80897	Fmr1nb-	6	5
84	80897	Fmr1nb-	1	2
85	80897	Fmr1nb-	2	2
86	80897	Fmr1nb-	3	10
87	80897	Fmr1nb-	4	0
88	80897	Fmr1nb-	5	8
89	80897	Fmr1nb-	6	3
90	80897	Fmr1nb-	7	2
91	80897	Fmr1nb-	1	3
92	80897	Fmr1nb-	2	5
93	80897	Fmr1nb-	3	3
94	80897	Fmr1nb-	4	3
95	80897	Fmr1nb-	5	4
96	80897	Fmr1nb-	6	3
97	80897	Fmr1nb-	7	0
98	80897	Fmr1nb-	8	1
99	80897	Fmr1nb-	1	2
100	80897	Fmr1nb-	2	0
101	80897	Fmr1nb-	3	7
102	80897	Fmr1nb-	4	0
103	80897	Fmr1nb-	5	2
104	80897	Fmr1nb-	6	8
105	80897	Fmr1nb-	7	3
106	80897	Fmr1nb-	8	14
107	80897	Fmr1nb-	1	18
108	80897	Fmr1nb-	2	2
109	80897	Fmr1nb-	3	0
110	80897	Fmr1nb-	4	12
111	80897	Fmr1nb-	5	0
112	80897	Fmr1nb-	6	1
113	80897	Fmr1nb-	7	4
114	80897	Fmr1nb-	8	1
115	80897	Fmr1nb-	1	0
116	80897	Fmr1nb-	2	4
117	80897	Fmr1nb-	3	5
118	80897	Fmr1nb-	4	5
119	80897	Fmr1nb-	5	3
120	80897	Fmr1nb-	6	0
121	80897	Fmr1nb-	7	3
122	80897	Fmr1nb-	8	2
123	80897	Fmr1nb-	1	7
124	80897	Fmr1nb-	2	4
125	80897	Fmr1nb-	3	5
126	80897	Fmr1nb-	4	0
127	80897	Fmr1nb-	5	7
128	80897	Fmr1nb-	6	1
129	80897	Fmr1nb-	7	1
130	80897	Fmr1nb-	8	3
131	80897	Fmr1nb-	1	9
132	80897	Fmr1nb-	2	9
133	80897	Fmr1nb-	3	2
134	80897	Fmr1nb-	4	4
135	80897	Fmr1nb-	5	1
136	80897	Fmr1nb-	6	2
137	80897	Fmr1nb-	7	2
138	80897	Fmr1nb-	8	9
139	80897	Fmr1nb-	1	2
140	80897	Fmr1nb-	2	2
141	80897	Fmr1nb-	3	1
142	80897	Fmr1nb-	4	7
143	80897	Fmr1nb-	5	1
144	80897	Fmr1nb-	6	3
145	80897	Fmr1nb-	7	3
146	80897	Fmr1nb-	8	0
147	80897	Fmr1nb-	9	0
148	80897	Fmr1nb-	10	0
149	80897	Fmr1nb-	11	8
1	80898	Fmr1nb-	1	3
2	80898	Fmr1nb-	2	1
3	80898	Fmr1nb-	3	2
4	80898	Fmr1nb-	4	4
5	80898	Fmr1nb-	5	0
6	80898	Fmr1nb-	6	2
7	80898	Fmr1nb-	7	3
8	80898	Fmr1nb-	8	2
9	80898	Fmr1nb-	9	6
10	80898	Fmr1nb-	10	4
11	80898	Fmr1nb-	11	8
12	80898	Fmr1nb-	1	2
13	80898	Fmr1nb-	2	2
14	80898	Fmr1nb-	3	2
15	80898	Fmr1nb-	4	1
16	80898	Fmr1nb-	5	0
17	80898	Fmr1nb-	6	3
18	80898	Fmr1nb-	7	2
19	80898	Fmr1nb-	8	2
20	80898	Fmr1nb-	9	7
21	80898	Fmr1nb-	10	2
22	80898	Fmr1nb-	11	19
23	80898	Fmr1nb-	1	0
24	80898	Fmr1nb-	2	3
25	80898	Fmr1nb-	3	6
26	80898	Fmr1nb-	4	2
27	80898	Fmr1nb-	5	6
28	80898	Fmr1nb-	6	0
29	80898	Fmr1nb-	7	13
30	80898	Fmr1nb-	8	4
31	80898	Fmr1nb-	9	1
32	80898	Fmr1nb-	10	2
33	80898	Fmr1nb-	11	1
34	80898	Fmr1nb-	1	0
35	80898	Fmr1nb-	2	3
36	80898	Fmr1nb-	3	1
37	80898	Fmr1nb-	4	3
38	80898	Fmr1nb-	5	8
39	80898	Fmr1nb-	6	5
40	80898	Fmr1nb-	7	6
41	80898	Fmr1nb-	8	9
42	80898	Fmr1nb-	1	2
43	80898	Fmr1nb-	2	3
44	80898	Fmr1nb-	3	1
45	80898	Fmr1nb-	4	8
46	80898	Fmr1nb-	5	0
47	80898	Fmr1nb-	6	12
48	80898	Fmr1nb-	7	1
49	80898	Fmr1nb-	1	4
50	80898	Fmr1nb-	2	12
51	80898	Fmr1nb-	3	0
52	80898	Fmr1nb-	4	4
53	80898	Fmr1nb-	1	0
54	80898	Fmr1nb-	2	1
55	80898	Fmr1nb-	3	4
56	80898	Fmr1nb-	4	8
57	80898	Fmr1nb-	1	1
58	80898	Fmr1nb-	2	2
59	80898	Fmr1nb-	3	7
60	80898	Fmr1nb-	4	2
61	80898	Fmr1nb-	1	2
62	80898	Fmr1nb-	2	0
63	80898	Fmr1nb-	3	0
64	80898	Fmr1nb-	4	1
65	80898	Fmr1nb-	5	1
66	80898	Fmr1nb-	6	2
67	80898	Fmr1nb-	7	3
68	80898	Fmr1nb-	1	1
69	80898	Fmr1nb-	2	2
70	80898	Fmr1nb-	3	1
71	80898	Fmr1nb-	4	1
72	80898	Fmr1nb-	5	8
73	80898	Fmr1nb-	6	1
74	80898	Fmr1nb-	7	0
75	80898	Fmr1nb-	1	6
76	80898	Fmr1nb-	2	1
77	80898	Fmr1nb-	3	0
78	80898	Fmr1nb-	4	7
79	80898	Fmr1nb-	5	1
80	80898	Fmr1nb-	6	5
81	80898	Fmr1nb-	7	1
82	80898	Fmr1nb-	8	4
83	80898	Fmr1nb-	9	0
84	80898	Fmr1nb-	10	0
85	80898	Fmr1nb-	1	1
86	80898	Fmr1nb-	2	1
87	80898	Fmr1nb-	3	0
88	80898	Fmr1nb-	4	0
89	80898	Fmr1nb-	5	2
90	80898	Fmr1nb-	6	7
91	80898	Fmr1nb-	7	11
92	80898	Fmr1nb-	1	0
93	80898	Fmr1nb-	2	1
94	80898	Fmr1nb-	3	1
95	80898	Fmr1nb-	4	1
96	80898	Fmr1nb-	5	3
97	80898	Fmr1nb-	6	2
98	80898	Fmr1nb-	7	2
99	80898	Fmr1nb-	8	3
100	80898	Fmr1nb-	9	11
101	80898	Fmr1nb-	1	1
102	80898	Fmr1nb-	2	7
103	80898	Fmr1nb-	3	0
104	80898	Fmr1nb-	4	1
105	80898	Fmr1nb-	5	2
106	80898	Fmr1nb-	6	2
107	80898	Fmr1nb-	7	11
108	80898	Fmr1nb-	8	8
109	80898	Fmr1nb-	1	1
110	80898	Fmr1nb-	2	6
111	80898	Fmr1nb-	3	5
112	80898	Fmr1nb-	4	1
113	80898	Fmr1nb-	5	2
114	80898	Fmr1nb-	6	3
115	80898	Fmr1nb-	7	10
116	80898	Fmr1nb-	1	2
117	80898	Fmr1nb-	2	2
118	80898	Fmr1nb-	3	0
119	80898	Fmr1nb-	4	2
120	80898	Fmr1nb-	5	1
121	80898	Fmr1nb-	1	0
122	80898	Fmr1nb-	2	0
123	80898	Fmr1nb-	3	28
124	80898	Fmr1nb-	4	0
125	80898	Fmr1nb-	1	3
126	80898	Fmr1nb-	2	3
127	80898	Fmr1nb-	3	0
128	80898	Fmr1nb-	4	2
129	80898	Fmr1nb-	5	7
130	80898	Fmr1nb-	1	3
131	80898	Fmr1nb-	2	8
132	80898	Fmr1nb-	3	2
133	80898	Fmr1nb-	4	0
134	80898	Fmr1nb-	5	1
135	80898	Fmr1nb-	6	4
136	80898	Fmr1nb-	7	3
137	80898	Fmr1nb-	8	2
138	80898	Fmr1nb-	1	8
139	80898	Fmr1nb-	2	8
140	80898	Fmr1nb-	3	17
141	80898	Fmr1nb-	4	8
142	80898	Fmr1nb-	5	5
143	80898	Fmr1nb-	6	0
144	80898	Fmr1nb-	7	3
145	80898	Fmr1nb-	8	0
146	80898	Fmr1nb-	9	1
1	80899	Fmr1nb-	1	15
2	80899	Fmr1nb-	2	1
3	80899	Fmr1nb-	3	0
4	80899	Fmr1nb-	4	8
5	80899	Fmr1nb-	5	0
6	80899	Fmr1nb-	6	0
7	80899	Fmr1nb-	7	4
8	80899	Fmr1nb-	8	0
9	80899	Fmr1nb-	9	0
10	80899	Fmr1nb-	1	5
11	80899	Fmr1nb-	2	0
12	80899	Fmr1nb-	3	9
13	80899	Fmr1nb-	1	0
14	80899	Fmr1nb-	2	0
15	80899	Fmr1nb-	3	4
16	80899	Fmr1nb-	4	2
17	80899	Fmr1nb-	5	10
18	80899	Fmr1nb-	6	0
19	80899	Fmr1nb-	1	0
20	80899	Fmr1nb-	2	1
21	80899	Fmr1nb-	3	6
22	80899	Fmr1nb-	4	1
23	80899	Fmr1nb-	5	0
24	80899	Fmr1nb-	6	8
25	80899	Fmr1nb-	7	2
26	80899	Fmr1nb-	1	13
27	80899	Fmr1nb-	2	5
28	80899	Fmr1nb-	3	1
29	80899	Fmr1nb-	4	2
30	80899	Fmr1nb-	5	8
31	80899	Fmr1nb-	1	1
32	80899	Fmr1nb-	2	2
33	80899	Fmr1nb-	3	1
34	80899	Fmr1nb-	4	1
35	80899	Fmr1nb-	5	15
36	80899	Fmr1nb-	6	2
37	80899	Fmr1nb-	7	1
38	80899	Fmr1nb-	1	0
39	80899	Fmr1nb-	2	5
40	80899	Fmr1nb-	3	9
41	80899	Fmr1nb-	4	0
42	80899	Fmr1nb-	5	1
43	80899	Fmr1nb-	1	9
44	80899	Fmr1nb-	2	2
45	80899	Fmr1nb-	3	2
46	80899	Fmr1nb-	4	1
47	80899	Fmr1nb-	5	6
48	80899	Fmr1nb-	6	0
49	80899	Fmr1nb-	7	2
50	80899	Fmr1nb-	8	1
51	80899	Fmr1nb-	1	13
52	80899	Fmr1nb-	2	5
53	80899	Fmr1nb-	3	8
54	80899	Fmr1nb-	4	2
55	80899	Fmr1nb-	5	1
56	80899	Fmr1nb-	1	6
57	80899	Fmr1nb-	2	4
58	80899	Fmr1nb-	3	4
59	80899	Fmr1nb-	4	0
60	80899	Fmr1nb-	5	3
61	80899	Fmr1nb-	1	2
62	80899	Fmr1nb-	2	15
63	80899	Fmr1nb-	3	0
64	80899	Fmr1nb-	4	0
65	80899	Fmr1nb-	5	1
66	80899	Fmr1nb-	6	1
67	80899	Fmr1nb-	7	0
68	80899	Fmr1nb-	8	0
69	80899	Fmr1nb-	1	6
70	80899	Fmr1nb-	2	4
71	80899	Fmr1nb-	3	0
72	80899	Fmr1nb-	4	3
73	80899	Fmr1nb-	1	12
74	80899	Fmr1nb-	2	3
75	80899	Fmr1nb-	3	0
76	80899	Fmr1nb-	4	0
77	80899	Fmr1nb-	5	2
78	80899	Fmr1nb-	6	19
79	80899	Fmr1nb-	7	0
80	80899	Fmr1nb-	8	0
81	80899	Fmr1nb-	1	0
82	80899	Fmr1nb-	2	1
83	80899	Fmr1nb-	3	1
84	80899	Fmr1nb-	4	3
85	80899	Fmr1nb-	5	13
86	80899	Fmr1nb-	6	0
87	80899	Fmr1nb-	7	6
88	80899	Fmr1nb-	8	3
89	80899	Fmr1nb-	9	3
90	80899	Fmr1nb-	10	3
91	80899	Fmr1nb-	1	1
92	80899	Fmr1nb-	2	4
93	80899	Fmr1nb-	3	1
94	80899	Fmr1nb-	4	4
95	80899	Fmr1nb-	5	1
96	80899	Fmr1nb-	6	2
97	80899	Fmr1nb-	7	3
98	80899	Fmr1nb-	1	3
99	80899	Fmr1nb-	2	1
100	80899	Fmr1nb-	3	5
101	80899	Fmr1nb-	4	1
102	80899	Fmr1nb-	5	0
103	80899	Fmr1nb-	6	5
104	80899	Fmr1nb-	7	5
105	80899	Fmr1nb-	1	4
106	80899	Fmr1nb-	2	1
107	80899	Fmr1nb-	3	1
108	80899	Fmr1nb-	4	1
109	80899	Fmr1nb-	5	1
110	80899	Fmr1nb-	6	8
111	80899	Fmr1nb-	1	4
112	80899	Fmr1nb-	2	0
113	80899	Fmr1nb-	3	0
114	80899	Fmr1nb-	4	4
115	80899	Fmr1nb-	5	0
116	80899	Fmr1nb-	6	3
117	80899	Fmr1nb-	7	0
118	80899	Fmr1nb-	8	2
119	80899	Fmr1nb-	9	3
120	80899	Fmr1nb-	1	0
121	80899	Fmr1nb-	2	2
122	80899	Fmr1nb-	3	3
123	80899	Fmr1nb-	4	3
124	80899	Fmr1nb-	1	1
125	80899	Fmr1nb-	2	0
126	80899	Fmr1nb-	3	1
127	80899	Fmr1nb-	4	7
128	80899	Fmr1nb-	5	0
1	80902	DX1s	1	0
2	80902	DX1s	3	0
3	80902	DX1s	4	1
4	80902	DX1s	1	0
5	80902	DX1s	2	0
6	80902	DX1s	3	0
7	80902	DX1s	4	0
8	80902	DX1s	5	0
9	80902	DX1s	6	0
10	80902	DX1s	7	0
11	80902	DX1s	1	0
12	80902	DX1s	2	0
13	80902	DX1s	3	0
14	80902	DX1s	4	1
15	80902	DX1s	5	0
16	80902	DX1s	6	0
17	80902	DX1s	7	0
18	80902	DX1s	1	0
19	80902	DX1s	2	0
20	80902	DX1s	3	0
21	80902	DX1s	4	0
22	80902	DX1s	5	0
23	80902	DX1s	6	0
24	80902	DX1s	7	0
25	80902	DX1s	8	0
26	80902	DX1s	1	0
27	80902	DX1s	2	0
28	80902	DX1s	3	0
29	80902	DX1s	4	0
30	80902	DX1s	5	1
31	80902	DX1s	1	1
32	80902	DX1s	2	0
33	80902	DX1s	3	0
34	80902	DX1s	4	3
35	80902	DX1s	5	3
36	80902	DX1s	6	1
37	80902	DX1s	1	1
38	80902	DX1s	2	2
39	80902	DX1s	3	0
40	80902	DX1s	1	1
41	80902	DX1s	2	0
42	80902	DX1s	3	1
43	80902	DX1s	4	0
44	80902	DX1s	1	1
45	80902	DX1s	2	0
46	80902	DX1s	3	1
47	80902	DX1s	4	2
48	80902	DX1s	1	7
49	80902	DX1s	2	1
50	80902	DX1s	3	4
51	80902	DX1s	4	5
52	80902	DX1s	5	2
53	80902	DX1s	1	2
54	80902	DX1s	2	3
55	80902	DX1s	3	1
56	80902	DX1s	4	0
57	80902	DX1s	5	0
58	80902	DX1s	1	1
59	80902	DX1s	2	4
60	80902	DX1s	3	0
61	80902	DX1s	1	0
62	80902	DX1s	2	4
63	80902	DX1s	3	1
64	80902	DX1s	4	0
65	80902	DX1s	5	2
66	80902	DX1s	1	0
67	80902	DX1s	2	0
68	80902	DX1s	3	0
69	80902	DX1s	1	0
70	80902	DX1s	2	0
71	80902	DX1s	3	0
72	80902	DX1s	4	0
73	80902	DX1s	1	0
74	80902	DX1s	2	1
75	80902	DX1s	3	0
76	80902	DX1s	4	4
77	80902	DX1s	5	0
78	80902	DX1s	1	0
79	80902	DX1s	2	0
80	80902	DX1s	3	5
81	80902	DX1s	1	3
82	80902	DX1s	2	3
83	80902	DX1s	3	1
84	80902	DX1s	4	3
85	80902	DX1s	5	0
86	80902	DX1s	6	1
87	80902	DX1s	1	1
88	80902	DX1s	2	0
89	80902	DX1s	3	0
90	80902	DX1s	4	3
91	80902	DX1s	5	0
92	80902	DX1s	6	0
93	80902	DX1s	1	5
94	80902	DX1s	2	1
95	80902	DX1s	3	1
96	80902	DX1s	4	1
97	80902	DX1s	1	2
98	80902	DX1s	2	2
99	80902	DX1s	3	0
100	80902	DX1s	4	0
101	80902	DX1s	5	2
102	80902	DX1s	1	3
103	80902	DX1s	2	2
104	80902	DX1s	3	1
105	80902	DX1s	4	3
106	80902	DX1s	1	2
107	80902	DX1s	2	1
108	80902	DX1s	3	2
109	80902	DX1s	4	2
110	80902	DX1s	1	0
111	80902	DX1s	2	0
112	80902	DX1s	3	0
113	80902	DX1s	1	2
114	80902	DX1s	2	1
115	80902	DX1s	3	1
116	80902	DX1s	4	0
117	80902	DX1s	5	0
118	80902	DX1s	6	1
119	80902	DX1s	1	1
120	80902	DX1s	2	3
121	80902	DX1s	3	5
122	80902	DX1s	1	0
123	80902	DX1s	2	1
124	80902	DX1s	3	1
125	80902	DX1s	4	0
126	80902	DX1s	5	1
127	80902	DX1s	6	2
128	80902	DX1s	7	0
129	80902	DX1s	1	10
130	80902	DX1s	2	0
131	80902	DX1s	3	2
132	80902	DX1s	4	0
133	80902	DX1s	1	0
134	80902	DX1s	2	1
135	80902	DX1s	3	0
136	80902	DX1s	4	0
137	80902	DX1s	1	1
138	80902	DX1s	2	0
139	80902	DX1s	3	0
140	80902	DX1s	4	0
141	80902	DX1s	5	0
142	80902	DX1s	6	0
143	80902	DX1s	7	0
1	80903	DX1s	1	3
2	80903	DX1s	2	0
3	80903	DX1s	3	13
4	80903	DX1s	4	1
5	80903	DX1s	5	1
6	80903	DX1s	6	0
7	80903	DX1s	7	0
8	80903	DX1s	8	0
9	80903	DX1s	9	0
10	80903	DX1s	10	0
11	80903	DX1s	1	0
12	80903	DX1s	2	1
13	80903	DX1s	3	1
14	80903	DX1s	4	0
15	80903	DX1s	5	1
16	80903	DX1s	6	0
17	80903	DX1s	1	0
18	80903	DX1s	2	0
19	80903	DX1s	3	0
20	80903	DX1s	4	2
21	80903	DX1s	5	0
22	80903	DX1s	1	1
23	80903	DX1s	2	0
24	80903	DX1s	3	2
25	80903	DX1s	4	0
26	80903	DX1s	5	0
27	80903	DX1s	6	3
28	80903	DX1s	7	0
29	80903	DX1s	8	2
30	80903	DX1s	1	0
31	80903	DX1s	2	0
32	80903	DX1s	3	0
33	80903	DX1s	4	0
34	80903	DX1s	5	1
35	80903	DX1s	6	0
36	80903	DX1s	1	0
37	80903	DX1s	2	0
38	80903	DX1s	3	3
39	80903	DX1s	4	0
40	80903	DX1s	5	1
41	80903	DX1s	6	2
42	80903	DX1s	1	0
43	80903	DX1s	2	0
44	80903	DX1s	3	10
45	80903	DX1s	4	0
46	80903	DX1s	5	14
47	80903	DX1s	1	0
48	80903	DX1s	2	4
49	80903	DX1s	3	0
50	80903	DX1s	4	1
51	80903	DX1s	5	2
52	80903	DX1s	1	3
53	80903	DX1s	2	0
54	80903	DX1s	1	3
55	80903	DX1s	2	0
56	80903	DX1s	3	1
57	80903	DX1s	4	0
58	80903	DX1s	5	0
59	80903	DX1s	6	0
60	80903	DX1s	7	4
61	80903	DX1s	8	1
62	80903	DX1s	9	0
63	80903	DX1s	1	0
64	80903	DX1s	2	2
65	80903	DX1s	3	2
66	80903	DX1s	4	6
67	80903	DX1s	5	0
68	80903	DX1s	6	1
69	80903	DX1s	7	5
70	80903	DX1s	8	3
71	80903	DX1s	1	4
72	80903	DX1s	2	0
73	80903	DX1s	3	1
74	80903	DX1s	4	0
75	80903	DX1s	5	3
76	80903	DX1s	1	6
77	80903	DX1s	2	0
78	80903	DX1s	3	0
79	80903	DX1s	4	1
80	80903	DX1s	5	0
81	80903	DX1s	6	2
82	80903	DX1s	1	4
83	80903	DX1s	2	4
84	80903	DX1s	3	8
85	80903	DX1s	4	0
86	80903	DX1s	5	0
87	80903	DX1s	6	0
88	80903	DX1s	7	0
89	80903	DX1s	8	0
90	80903	DX1s	9	5
91	80903	DX1s	1	4
92	80903	DX1s	2	0
93	80903	DX1s	3	4
94	80903	DX1s	4	0
95	80903	DX1s	1	1
96	80903	DX1s	2	0
97	80903	DX1s	3	0
98	80903	DX1s	4	0
99	80903	DX1s	5	6
100	80903	DX1s	6	3
101	80903	DX1s	7	0
102	80903	DX1s	1	7
103	80903	DX1s	2	0
104	80903	DX1s	3	1
105	80903	DX1s	4	1
106	80903	DX1s	5	3
107	80903	DX1s	1	1
108	80903	DX1s	2	4
109	80903	DX1s	3	2
110	80903	DX1s	4	0
111	80903	DX1s	5	1
112	80903	DX1s	1	9
113	80903	DX1s	2	0
114	80903	DX1s	3	0
115	80903	DX1s	4	0
116	80903	DX1s	5	0
117	80903	DX1s	6	10
118	80903	DX1s	1	0
119	80903	DX1s	2	0
120	80903	DX1s	3	2
121	80903	DX1s	4	3
122	80903	DX1s	5	7
123	80903	DX1s	6	5
1	80904	DX1s	1	4
2	80904	DX1s	2	2
3	80904	DX1s	3	0
4	80904	DX1s	4	1
5	80904	DX1s	5	0
6	80904	DX1s	6	1
7	80904	DX1s	7	14
8	80904	DX1s	1	0
9	80904	DX1s	2	0
10	80904	DX1s	3	0
11	80904	DX1s	4	2
12	80904	DX1s	5	2
13	80904	DX1s	1	1
14	80904	DX1s	2	3
15	80904	DX1s	3	5
16	80904	DX1s	4	0
17	80904	DX1s	5	0
18	80904	DX1s	1	0
19	80904	DX1s	2	6
20	80904	DX1s	3	2
21	80904	DX1s	4	3
22	80904	DX1s	5	0
23	80904	DX1s	6	3
24	80904	DX1s	1	0
25	80904	DX1s	2	16
26	80904	DX1s	3	1
27	80904	DX1s	4	1
28	80904	DX1s	5	9
29	80904	DX1s	6	3
30	80904	DX1s	1	0
31	80904	DX1s	2	0
32	80904	DX1s	3	0
33	80904	DX1s	4	12
34	80904	DX1s	5	4
35	80904	DX1s	6	0
36	80904	DX1s	7	1
37	80904	DX1s	8	0
38	80904	DX1s	9	5
39	80904	DX1s	10	3
40	80904	DX1s	1	4
41	80904	DX1s	2	7
42	80904	DX1s	3	2
43	80904	DX1s	4	1
44	80904	DX1s	5	8
45	80904	DX1s	6	1
46	80904	DX1s	1	2
47	80904	DX1s	2	3
48	80904	DX1s	3	2
49	80904	DX1s	4	3
50	80904	DX1s	5	0
51	80904	DX1s	6	0
52	80904	DX1s	7	3
53	80904	DX1s	1	2
54	80904	DX1s	2	4
55	80904	DX1s	3	0
56	80904	DX1s	4	0
57	80904	DX1s	5	1
58	80904	DX1s	6	0
59	80904	DX1s	1	3
60	80904	DX1s	2	0
61	80904	DX1s	3	0
62	80904	DX1s	4	1
63	80904	DX1s	5	2
64	80904	DX1s	6	6
65	80904	DX1s	7	2
66	80904	DX1s	8	0
67	80904	DX1s	1	0
68	80904	DX1s	2	0
69	80904	DX1s	3	0
70	80904	DX1s	4	0
71	80904	DX1s	5	0
72	80904	DX1s	6	0
73	80904	DX1s	7	0
74	80904	DX1s	8	3
75	80904	DX1s	1	0
76	80904	DX1s	2	0
77	80904	DX1s	3	0
78	80904	DX1s	4	0
79	80904	DX1s	5	0
80	80904	DX1s	6	1
81	80904	DX1s	1	0
82	80904	DX1s	2	4
83	80904	DX1s	3	3
84	80904	DX1s	4	0
85	80904	DX1s	5	0
86	80904	DX1s	6	0
87	80904	DX1s	7	0
88	80904	DX1s	1	0
89	80904	DX1s	2	0
90	80904	DX1s	3	0
91	80904	DX1s	4	7
92	80904	DX1s	5	1
93	80904	DX1s	6	0
94	80904	DX1s	7	2
95	80904	DX1s	1	2
96	80904	DX1s	2	0
97	80904	DX1s	3	0
98	80904	DX1s	4	0
99	80904	DX1s	5	0
100	80904	DX1s	6	1
101	80904	DX1s	7	0
102	80904	DX1s	1	0
103	80904	DX1s	2	1
104	80904	DX1s	3	0
105	80904	DX1s	4	0
106	80904	DX1s	5	0
107	80904	DX1s	6	8
108	80904	DX1s	7	3
109	80904	DX1s	8	0
110	80904	DX1s	9	4
111	80904	DX1s	10	3
112	80904	DX1s	1	0
113	80904	DX1s	2	0
114	80904	DX1s	3	0
115	80904	DX1s	4	1
116	80904	DX1s	5	4
117	80904	DX1s	6	0
118	80904	DX1s	7	0
119	80904	DX1s	8	0
120	80904	DX1s	9	0
121	80904	DX1s	1	3
122	80904	DX1s	2	1
123	80904	DX1s	3	0
124	80904	DX1s	4	0
125	80904	DX1s	5	0
126	80904	DX1s	1	0
127	80904	DX1s	2	0
128	80904	DX1s	3	0
129	80904	DX1s	4	4
130	80904	DX1s	5	0
131	80904	DX1s	1	1
132	80904	DX1s	2	0
133	80904	DX1s	3	3
134	80904	DX1s	4	2
135	80904	DX1s	5	0
136	80904	DX1s	6	1

## Sheet: S4.6_Figure S3 - Fmr1nb EXPRESS
S4.6 Data source for Figure S3
Mouse ID		Fmr1nb Cp	Actb Cp	dCp	2^-dCP	mean	100x
1	DXpS_10dpp	20.79	15.08	5.71	0.0191038
2	DXpS_10dpp	20.71	14.58	6.13	0.0142786	0.017812	1.7812
3	DXpS_10dpp	21.16	15.52	5.64	0.0200535
1	DXpS_12dpp	19.28	15.2	4.08	0.0591286
2	DXpS_12dpp	19.34	14.96	4.38	0.0480273	0.0641778	6.41778
3	DXpS_12dpp	19.27	15.72	3.55	0.0853775
1	DXpS_14dpp	18.98	15.27	3.71	0.076415
2	DXpS_14dpp	19.5	14.78	4.72	0.0379436	0.0712669	7.12669
3	DXpS_14dpp	19.1	15.77	3.33	0.0994421
1	DXpS_20dpp	18.95	15.67	3.28	0.102949
2	DXpS_20dpp	18.84	15.46	3.38	0.0960547	0.108583	10.8583
3	DXpS_20dpp	18.88	15.9	2.98	0.126745
1	B6_10dpp	19.78	15.1	4.68	0.0390103
2	B6_10dpp	19.71	14.7	5.01	0.0310341	0.0433328	4.33328
3	B6_10dpp	19.71	15.65	4.06	0.059954
1	B6_12dpp	18.94	14.69	4.25	0.052556
2	B6_12dpp	19.34	15.3	4.04	0.0607909	0.0548219	5.48219
3	B6_12dpp	19.33	15.04	4.29	0.0511189
1	B6_14dpp	20.05	15.33	4.72	0.0379436
2	B6_14dpp	18.94	14.97	3.97	0.0638133	0.0625761	6.25761
3	B6_14dpp	18.52	14.98	3.54	0.0859714
1	B6_20dpp	19.31	15.56	3.75	0.0743254
2	B6_20dpp	19.15	15.7	3.45	0.0915054	0.0975252	9.75252
3	B6_20dpp	19.19	16.21	2.98	0.126745
1	PWD_10dpp	20.81	15.21	5.6	0.0206173
2	PWD_10dpp	20.9	15.01	5.89	0.0168629	0.0186444	1.86444
3	PWD_10dpp	20.63	14.87	5.76	0.018453
1	PWD_12dpp	20.34	14.93	5.41	0.0235195
2	PWD_12dpp	19.88	15.14	4.74	0.0374212	0.0363227	3.63227
3	PWD_12dpp	19.8	15.42	4.38	0.0480273
1	PWD_14dpp	20.59	15.18	5.41	0.0235195
2	PWD_14dpp	20.19	15.49	4.7	0.0384733	0.0383048	3.83048
3	PWD_14dpp	19.73	15.49	4.24	0.0529216
1	PWD_20dpp	19.61	15.48	4.13	0.0571145
2	PWD_20dpp	19.57	15.44	4.13	0.0571145	0.0637252	6.37252
3	PWD_20dpp	19.16	15.46	3.7	0.0769465
	CTRL neg - water	0	0	0
1	PWD	21.47	18.97	2.5	0.176777
2	PWD	21.33	18.84	2.49	0.178006	0.147724
3	PWD	21.67	18.17	3.5	0.0883883
1	B6	20.73	18.14	2.59	0.166086
2	B6	21.07	18.45	2.62	0.162668	0.13385
3	B6	21.58	17.8	3.78	0.0727958
1	(PWDxB6)F1	20.51	18.53	1.98	0.25349
2	(PWDxB6)F1	20.2	18.89	1.31	0.403321	0.334363
3	(PWDxB6)F1	20.27	18.74	1.53	0.346277
1	spleen/b6	30.09	15.89	14.2	5.31342e-05
2	intestine/b6	26.87	15.45	11.42	0.000364953
3	forebrain/b6	28.83	18.94	9.89	0.00105393
4	heart/b6	26.98	19.31	7.67	0.00491021
5	pancreas/b6	33.52	28.99	4.53	0.0432847
6	liver/b6	27.04	19.99	7.05	0.00754638
7	kidney/b6	27.77	18.48	9.29	0.00159746
	CTRL neg - water	33.69	37.35	-3.66	12.6407

## Sheet: S4.7_Figure S5 - Litter size
S4.7 Data source for Figure S5
	Cage	DATE IN	DOB I	progeny nr	DOB II	progeny nr	DOB III	progeny nr	DOB IV	progeny nr
B6 x DX1s	B-05361	2017-05-02	2017-05-23	5	2017-07-05	9	2017-07-27
	B-05362	2017-05-02	2017-05-25	3	2017-06-18	3	2018-07-11	4	2017-08-24	4
	B-05363	2017-05-02	2017-05-22	6	2017-08-19	4
B6 x Fmr1nbDEL	B-05358	2017-05-02	2017-05-24	1	2017-06-18	3	2017-07-08	2	2017-08-07	3
	B-05359	2017-05-02	2017-06-18	1
	B-05360	2017-05-02	2017-06-14	2	2017-07-30	3
									LEGEND:
									DATE IN - date when breeding started
									DOB - date of birth
									progeny nr - number of born progeny

## Sheet: S4.8_Figure S6 - TW_SC
S4.8 Data source for Figure S6
ID	Strain	T.W.	S.C.
48710	B6	198	95			LEGEND:
49828	B6	175	85.33			mouse_id - mouse identification number from PyRAT system
28808	B6	210	88.5			strain - name of the strain
28809	B6	201	98.5			T.W. - weight of pair of the testes [mg]
49829	B6	162	68			S.C. - sperm count - number of sperms [x106]
28827	B6	216	76
28828	B6	220	110.5
28829	B6	187	62.5
48709	B6	185	73.3
28830	B6	217	87.5
31001	B6.Fmr1nb-	190	73.63
28967	B6.Fmr1nb-	170	47.25
31563	B6.Fmr1nb-	128	34.5
31376	B6.Fmr1nb-	179	68.5
31378	B6.Fmr1nb-	178	70
35494	B6.Fmr1nb-	187	52.5
35495	B6.Fmr1nb-	165	63
35502	B6.Fmr1nb-	180	75.5
35503	B6.Fmr1nb-	132	33
31747	B6.Fmr1nb-	149	27.5
21O-B1348	DX1s	186	39.4
21O-B1349	DX1s	182	51
21O-B1501	DX1s	170	52.7
21O-B1502	DX1s	159	46.4
21O-B1503	DX1s	177	57.2
21S-74408	DX1s	168	60.8
21S-74409	DX1s	161	67.6
21G-79647	DX1s	176	55.2
21S-79073	DX1s	180	68.6
21S-84616	DX1s	173	64.5
21S-84617	DX1s	171	49.65
21S-84618	DX1s	168	49.95
21S-84619	DX1s	157	33.5
21G-81644	DX1s	179	52.7
21G-91239	DX1s.Fmr1nb-	163	44.9
21G-91240	DX1s.Fmr1nb-	159	67.8
21G-91241	DX1s.Fmr1nb-	134	26.6
21G-91373	DX1s.Fmr1nb-	171	52.3
21G-91374	DX1s.Fmr1nb-	165	27.8
21G-76560	DX1s.Fmr1nb-	152	50.1
21S-84480	DX1s.Fmr1nb-	131	44.8
21S-84481	DX1s.Fmr1nb-	146	41.1
21G-79869	DX1s.Fmr1nb-	162	65.4
21S-84296	DX1s.Fmr1nb-	170	63.6
21S-84482	DX1s.Fmr1nb-	120	24
21S-84600	DX1s.Fmr1nb-	118	31
21S-84636	DX1s.Fmr1nb-	136	32.6
21S-84637	DX1s.Fmr1nb-	157	58.15
21S-84640	DX1s.Fmr1nb-	125	32.2
21G-80727	DX1s.Fmr1nb-	124	44.9
21G-80728	DX1s.Fmr1nb-	149	37.4
21G-80729	DX1s.Fmr1nb-	147	59.6
21G-80730	DX1s.Fmr1nb-	151	47.8
21G-80851	DX1s.Fmr1nb-	159	46
21G-80852	DX1s.Fmr1nb-	157	32.4
21G-80853	DX1s.Fmr1nb-	156	37.4
21G-80854	DX1s.Fmr1nb-	154	47.8

## Sheet: S4.9_TABLE S5
S4.9 Data source for Figure S5
ID	Strain	T.W.	S.C.
21G-74792	(DX1s.Fmr1nb- x PWD)F1	57	0			LEGEND:
21G-74794	(DX1s.Fmr1nb- x PWD)F1	62	0			mouse_id - mouse identification number from PyRAT system
21G-74795	(DX1s.Fmr1nb- x PWD)F1	63	0			strain - name of the strain
21G-75168	(DX1s.Fmr1nb- x PWD)F1	55	0			T.W. - weight of pair of the testes [mg]
21G-75169	(DX1s.Fmr1nb- x PWD)F1	53	0			S.C. - sperm count - number of sperms [x106]
21G-75432	(DX1s.Fmr1nb- x PWD)F1	61	0
21G-75435	(DX1s.Fmr1nb- x PWD)F1	62	0
21G-75436	(DX1s.Fmr1nb- x PWD)F1	54	0
21G-79201	(DX1s.Fmr1nb- x PWD)F1	63	0
21G-79203	(DX1s.Fmr1nb- x PWD)F1	63	0.12
21H-36758	(DX1s x PWD)F1	68	0.01
21H-36759	(DX1s x PWD)F1	61	0.005
21H-36836	(DX1s x PWD)F1	71	0.03
21H-36838	(DX1s x PWD)F1	68	0
21H-36839	(DX1s x PWD)F1	68	0
21H-36840	(DX1s x PWD)F1	70	0.005
